# Supplementary material for: Distributions of Extracellular Peptidases Across Prokaryotic Genomes Reflect Phylogeny and Habitat
Source: Front Microbiol. 2019 Mar 5;10:413. doi: 10.3389/fmicb.2019.00413 (PMC6411800; doi:10.3389/fmicb.2019.00413)
Supplement: Supplementary file 2 [file Data_Sheet_2.CSV]

mernum	merid	pfam	seqid	pname_mysql(more accurate)	pname
MER0168116	sp003081	A01.UPA	YP_001184249	peptidase S41	subfamily A1A unassigned peptidases
MER0377591	sp004695	A01.UPA	E4N8L0	Uncharacterized protein	subfamily A1A unassigned peptidases
MER0971429	sp000718	A02.UPA	B2J0L2	Peptidase S8 and S53, subtilisin, kexin, sedolisin	subfamily A2A unassigned peptidases
MER0132059	sp018414	A08.001	GEBA2500702600	hypothetical protein	signal peptidase II
MER0499726	sp030950	A08.001	YP_007593289	hypothetical protein	signal peptidase II
MER0511039	sp015076	A08.001	YP_008978940	hypothetical protein	signal peptidase II
MER0192992	sp020748	A08.001	R6NXQ1	hypothetical protein BIFPSEUDO_03051	signal peptidase II
MER0233914	sp003078	A08.001	EEG25192	hypothetical protein EIKCOROL_00196	signal peptidase II
MER0016102	sp000926	A08.001	AFK90527	Lipoprotein signal peptidase	signal peptidase II
MER0020137	sp000839	A08.001	N9W6B0	Lipoprotein signal peptidase	family A8 unassigned peptidases
MER0022090	sp002592	A08.001	A0A0A8LZ26	Lipoprotein signal peptidase	family A8 unassigned peptidases
MER0063323	sp005440	A08.001	EAQ32843	Lipoprotein signal peptidase	signal peptidase II
MER0063418	sp003977	A08.001	ACL63374	lipoprotein signal peptidase	signal peptidase II
MER0076000	sp005218	A08.001	ABM23266	lipoprotein signal peptidase	signal peptidase II
MER0076299	sp003081	A08.001	YP_006010480	lipoprotein signal peptidase	signal peptidase II
MER0076776	sp001957	A08.001	ABM17985	lipoprotein signal peptidase	signal peptidase II
MER0076973	sp005131	A08.001	ABM43587	lipoprotein signal peptidase	signal peptidase II
MER0110873	sp015084	A08.001	ACG71256	lipoprotein signal peptidase	signal peptidase II
MER0123226	sp002236	A08.001	ACC55548	Lipoprotein signal peptidase	signal peptidase II
MER0128435	sp001953	A08.001	YP_003150302	lipoprotein signal peptidase	signal peptidase II
MER0153254	sp024865	A08.001	ACL71569	lipoprotein signal peptidase	signal peptidase II
MER0156501	sp000566	A08.001	EHT08102	lipoprotein signal peptidase	signal peptidase II
MER0194117	sp019416	A08.001	A0A0D6CU84	Lipoprotein signal peptidase	family A8 unassigned peptidases
MER0195476	sp005220	A08.001	W6EXU9	Lipoprotein signal peptidase	family A8 unassigned peptidases
MER0204513	sp022657	A08.001	YP_003658724	lipoprotein signal peptidase	signal peptidase II
MER0215170	sp023275	A08.001	YP_003695772	lipoprotein signal peptidase	signal peptidase II
MER0219472	sp027221	A08.001	YP_006864665	lipoprotein signal peptidase	signal peptidase II
MER0224152	sp027513	A08.001	H8E9J2	Lipoprotein signal peptidase	signal peptidase II
MER0231660	sp023635	A08.001	YP_004111332	lipoprotein signal peptidase	signal peptidase II
MER0237556	sp000381	A08.001	A0A0F0M368	Lipoprotein signal peptidase	family A8 unassigned peptidases
MER0242895	sp024079	A08.001	YP_004372940	lipoprotein signal peptidase	signal peptidase II
MER0247234	sp024121	A08.001	YP_004222939	lipoprotein signal peptidase	signal peptidase II
MER0249927	sp024538	A08.001	YP_004511086	Lipoprotein signal peptidase	signal peptidase II
MER0308154	sp029726	A08.001	YP_007357425	lipoprotein signal peptidase	signal peptidase II
MER0324426	sp027405	A08.001	ZP_09756617	lipoprotein signal peptidase	signal peptidase II
MER0324452	sp027456	A08.001	ZP_08960053	lipoprotein signal peptidase	signal peptidase II
MER0324453	sp016462	A08.001	N9AXL6	Lipoprotein signal peptidase	family A8 unassigned peptidases
MER0400890	sp028115	A08.001	ZP_10352709	lipoprotein signal peptidase	signal peptidase II
MER0400905	sp028123	A08.001	ZP_10494516	lipoprotein signal peptidase	signal peptidase II
MER0401294	sp027123	A08.001	ZP_09269398	lipoprotein signal peptidase	signal peptidase II
MER0401384	sp024058	A08.001	ZP_08070711	lipoprotein signal peptidase	signal peptidase II
MER0061491	sp005468	A08.001	YP_559879	Lipoprotein signal peptidase LspA	signal peptidase II
MER0324429	sp027469	A08.001	ZP_09993658	lipoprotein signal peptidase, partial	signal peptidase II
MER0094663	sp000842	A08.001	ACM78476	LspA	signal peptidase II
MER0401382	sp002267	A08.001	W6R0D8	lspA	signal peptidase II
MER0188373	sp027197	A08.001	YP_005373583	lspA gene product	signal peptidase II
MER0193017	sp005257	A08.001	ADB10182	LspA Lipoprotein signal peptidase	signal peptidase II
MER0426673	sp003193	A08.001	WP_016807179	peptidase A8	signal peptidase II
MER0401533	sp027328	A08.001	ZP_09848859	peptidase A8 signal peptidase II	signal peptidase II
MER0062886	sp005453	A08.001	ZP_01151374	Peptidase A8, signal peptidase II	signal peptidase II
MER0186224	sp027193	A08.001	YP_005461270	putative signal peptidase II	signal peptidase II
MER0086504	sp001905	A08.001	EAU68432	signal peptidase II	signal peptidase II
MER0252622	sp024575	A08.001	YP_004605330	signal peptidase II	signal peptidase II
MER0401066	sp028298	A08.001	ZP_10414937	signal peptidase II	signal peptidase II
MER0401379	sp018559	A08.001	ZP_05031477	signal peptidase II	signal peptidase II
MER0425815	sp000403	A08.001	EHU55206	signal peptidase II	signal peptidase II
MER0426701	sp024960	A08.001	ZP_08197751	signal peptidase II	signal peptidase II
MER0097487	sp003192	A08.001	BAF90238	signal peptidase II precursor	signal peptidase II
MER0114285	sp001960	A08.001	CAN94541	Signal peptidase II.	signal peptidase II
MER0049539	sp003953	A08.001	ABL81713	similar to Lipoprotein signal peptidase	signal peptidase II
MER0163809	sp029288	A08.UPW	K6WS02	Lipoprotein signal peptidase	family A8 unassigned peptidases
MER0200282	sp000835	A08.UPW	X6X6X5	Lipoprotein signal peptidase	family A8 unassigned peptidases
MER0420927	sp030950	A08.UPW	A0A087EG92	Lipoprotein signal peptidase	family A8 unassigned peptidases
MER0425890	sp003259	A08.UPW	EIC71221	lipoprotein signal peptidase	family A8 unassigned peptidases
MER0452824	sp027221	A08.UPW	A0A0F4KZR1	Lipoprotein signal peptidase	family A8 unassigned peptidases
MER0460427	sp027125	A08.UPW	R7Y3R8	Lipoprotein signal peptidase	family A8 unassigned peptidases
MER0463184	sp001103	A08.UPW	V9SKA9	Lipoprotein signal peptidase	family A8 unassigned peptidases
MER0285165	sp023376	A08.UPW	YP_004964141	unnamed protein product	family A8 unassigned peptidases
MER0499498	sp000127	A11.UPA	YP_007661162	hypothetical protein	subfamily A11A unassigned peptidases
MER0692666	sp018426	A24.018	C8X8P5	Peptidase A24A prepilin type IV	EppA peptidase
MER0691630	sp020938	A24.UNA	S4HAH8	Uncharacterized protein	subfamily A24A non peptidase homologues
MER0194212	sp018392	A24.UPA	ACU54635	conserved hypothetical protein	subfamily A24A unassigned peptidases
MER0427298	sp027450	A24.UPA	ZP_10084938	Flp pilus assembly protein, protease CpaA	subfamily A24A unassigned peptidases
MER0131400	sp018437	A24.UPA	GEBA2500560958	hypothetical protein	subfamily A24A unassigned peptidases
MER0426820	sp027333	A24.UPA	ZP_09824072	hypothetical protein CCH26_02167	subfamily A24A unassigned peptidases
MER0121273	sp011450	A24.UPA	YP_001223550	hypothetical protein CMM_2805	subfamily A24A unassigned peptidases
MER0426703	sp001943	A24.UPA	ZP_08220088	hypothetical protein SclaA2_30007	subfamily A24A unassigned peptidases
MER0427001	sp024581	A24.UPA	YP_004574597	peptidase A24 family protein	subfamily A24A unassigned peptidases
MER0332928	sp023750	A24.UPA	ZP_07740486	peptidase A24A domain protein	subfamily A24A unassigned peptidases
MER0127855	sp018397	A24.UPA	YP_002882035	peptidase A24A prepilin type IV	subfamily A24A unassigned peptidases
MER0426839	sp027320	A24.UPA	ZP_10094467	Peptidase A24A prepilin type IV	subfamily A24A unassigned peptidases
MER0661425	sp028050	A24.UPA	I4ETS0	Peptidase A24A prepilin type IV	subfamily A24A unassigned peptidases
MER0052117	sp000188	A24.UPA	BAC46706	pilus assembly protein prepilin peptidase subunit	subfamily A24A unassigned peptidases
MER0427032	sp027194	A24.UPA	YP_005448336	pilus assembly protein prepilin peptidase subunit	subfamily A24A unassigned peptidases
MER0427034	sp000188	A24.UPA	YP_005613237	pilus assembly protein prepilin peptidase subunit	subfamily A24A unassigned peptidases
MER0691858	sp029767	A24.UPA	M2YY25	Prepilin signal peptidase PulO-like peptidase	subfamily A24A unassigned peptidases
MER0646749	sp011450	A24.UPA	A0A0D5CKI9	Prepilin signalpeptidase	subfamily A24A unassigned peptidases
MER0427012	sp004695	A24.UPA	YP_004906501	putative peptidase A24A family protein	subfamily A24A unassigned peptidases
MER0202840	sp022649	A24.UPA	A0A0E9BAY3	Type 4 prepilin-like proteins leader peptide-processing enzyme	type 4 prepilin peptidase 2
MER0426951	sp018434	A24.UPA	YP_003144518	type IV leader peptidase	subfamily A24A unassigned peptidases
MER0675395	sp027158	A24.UPA	H5X6U3	Type IV leader peptidase	subfamily A24A unassigned peptidases
MER0691893	sp011450	A24.UPA	A0A067LNL3	Type IV leader peptidase	subfamily A24A unassigned peptidases
MER0427004	sp024573	A24.UPA	YP_004674422	type IV prepilin peptidase, cpaA	subfamily A24A unassigned peptidases
MER0241694	sp024921	A24.UPA	E4HH67	Uncharacterized protein	subfamily A24A unassigned peptidases
MER0621693	sp003546	A24.UPA	F1UHS9	Uncharacterized protein	subfamily A24A unassigned peptidases
MER0670675	sp000876	A24.UPA	T5HM24	Uncharacterized protein	subfamily A24A unassigned peptidases
MER0693259	sp003546	A24.UPA	A0A0E1YJD2	Uncharacterized protein	subfamily A24A unassigned peptidases
MER0054438	sp000876	A24.UPW	AAP73947	putative type 4 peptidase	family A24 unassigned peptidases
MER0195458	sp027115	A26.001	ZP_09461373	outer membrane protease	omptin
MER0195574	sp000403	A26.001	ZP_07138258	outer membrane protease	omptin
MER0101062	sp000403	A26.001	ACB20221	outer membrane protease 7	omptin
MER0279910	sp021017	A26.001	EEH84933	outer membrane protein 3b	omptin
MER0000606	sp000403	A26.001	OMPT_ECO57	Protease 7	omptin
MER0219278	sp000403	A26.001	ZP_13840848	protease 7	omptin
MER0287547	sp000403	A26.001	EHP67155	protease 7	omptin
MER0322187	sp000403	A26.001	ZP_19614970	protease 7	omptin
MER0411545	sp000403	A26.001	ZP_19637944	protease 7	omptin
MER0219142	sp000403	A26.001	ZP_20295491	protease 7, partial	omptin
MER0184824	sp000403	A26.002	EFZ69414	coagulase/fibrinolysin	OmpP peptidase
MER0108735	sp001912	A26.002	ABX21632	hypothetical protein SARI_01746	family A26 unassigned peptidases
MER0195629	sp000399	A26.002	CBX81734	IcsP/SopA	OmpP peptidase
MER0195576	sp001912	A26.002	ADR78009	omptin outer membrane serine protease	OmpP peptidase
MER0195580	sp001912	A26.002	EHY70107	outer membrane protease	family A26 unassigned peptidases
MER0195616	sp000399	A26.002	YP_003537830	outer membrane protease	OmpP peptidase
MER0195624	sp000399	A26.002	CBJ45417	outer membrane protease	OmpP peptidase
MER0411547	sp000403	A26.002	WP_001407138	outer membrane protease	OmpP peptidase
MER0162337	sp004446	A26.002	ZP_02902682	protease 7	OmpP peptidase
MER0195582	sp003125	A26.002	CBG88767	protease 7 precursor	OmpP peptidase
MER0195620	sp000566	A26.003	EHS88033	coagulase/fibrinolysin	plasminogen activator Pla
MER0195645	sp000403	A26.003	ZP_08348050	coagulase/fibrinolysin	plasminogen activator Pla
MER0318431	sp028148	A26.003	ZP_10489552	coagulase/fibrinolysin	plasminogen activator Pla
MER0001779	sp001140	A26.003	YP_636788	Coagulase/fibrolysin	plasminogen activator Pla
MER0195619	sp000381	A26.003	YP_003612613	outer membrane protease	plasminogen activator Pla
MER0195630	sp027112	A26.003	ZP_09037633	outer membrane protease	plasminogen activator Pla
MER0041751	sp001141	A26.003	ACC88330	peptidase A26 omptin	plasminogen activator Pla
MER0282132	sp000381	A26.003	YP_004951924	pla gene product	plasminogen activator Pla
MER0095397	sp011099	A26.003	YP_001176628	Plasminogen activator Pla	plasminogen activator Pla
MER0195627	sp023581	A26.003	ZP_07376883	Plasminogen activator Pla	plasminogen activator Pla
MER0232005	sp022132	A26.003	YP_004116161	Plasminogen activator Pla	plasminogen activator Pla
MER0131027	sp000567	A26.003	YP_002235876	protease VII	plasminogen activator Pla
MER0195623	sp000566	A26.003	YP_006498406	Protease VII	plasminogen activator Pla
MER0220990	sp003079	A26.003	ELP26840	Protease VII precursor	plasminogen activator Pla
MER0015551	sp001140	A26.003	Q8ZGQ6	putative outer membrane-associated protease	plasminogen activator Pla
MER0195633	sp022649	A26.003	YP_005193469	unnamed protein product	plasminogen activator Pla
MER0254972	sp005127	A26.004	YP_004731027	outer membrane protease E	protein E
MER0000608	sp001912	A26.004	PGTE_SALTY	Phosphoglycerate transport system activator	protein E
MER0059110	sp003489	A26.005	EFW51221	outer membrane protease	IcsP peptidase
MER0101082	sp001926	A26.005	YP_005454580	outer membrane protease	IcsP peptidase
MER0112657	sp005165	A26.005	EFW56761	outer membrane protease	IcsP peptidase
MER0003151	sp000933	A26.005	P95750	Proteinase SopA	IcsP peptidase
MER0020793	sp000403	A26.005	Q93IG9	SopA protein	IcsP peptidase
MER0320036	sp000867	A26.UPW	AFJ91377	hypothetical protein	family A26 unassigned peptidases
MER0510044	sp279368	A26.UPW	YP_008632069	hypothetical protein	family A26 unassigned peptidases
MER0287551	sp000040	A26.UPW	EGP57457	hypothetical protein Agau_C201807	family A26 unassigned peptidases
MER0240170	sp023903	A26.UPW	YP_004278377	hypothetical protein AGROH133_05297	family A26 unassigned peptidases
MER0195674	sp000040	A26.UPW	EHJ99482	hypothetical protein AT5A_05555	family A26 unassigned peptidases
MER0287552	sp000040	A26.UPW	EHH08632	hypothetical protein ATCR1_00525	family A26 unassigned peptidases
MER0492858	sp000403	A26.UPW	EQV93406	hypothetical protein G893_02134	family A26 unassigned peptidases
MER0040766	sp000592	A26.UPW	CBX00892	hypothetical protein LPW_25941	family A26 unassigned peptidases
MER0246161	sp024429	A26.UPW	YP_004441028	hypothetical protein Trebr_2491	family A26 unassigned peptidases
MER0242672	sp024081	A26.UPW	YP_004366086	hypothetical protein Tresu_1903	family A26 unassigned peptidases
MER0222470	sp000403	A26.UPW	ZP_19615279	hypothetical protein WCO_01256	family A26 unassigned peptidases
MER0195605	sp023677	A26.UPW	YP_005817922	ompT gene product	family A26 unassigned peptidases
MER0072216	sp004446	A26.UPW	ZP_23030692	outer membrane protease	family A26 unassigned peptidases
MER0073145	sp029839	A26.UPW	YP_007466780	outer membrane protease	family A26 unassigned peptidases
MER0073560	sp029839	A26.UPW	YP_007466547	outer membrane protease	family A26 unassigned peptidases
MER0184826	sp003889	A26.UPW	ZP_04637866	Outer membrane protease	family A26 unassigned peptidases
MER0184828	sp020869	A26.UPW	ZP_05110423	outer membrane protease	family A26 unassigned peptidases
MER0195604	sp002921	A26.UPW	YP_002647296	outer membrane protease	family A26 unassigned peptidases
MER0195646	sp027115	A26.UPW	ZP_09457888	outer membrane protease	family A26 unassigned peptidases
MER0195675	sp027128	A26.UPW	ZP_09294411	outer membrane protease	family A26 unassigned peptidases
MER0223766	sp020871	A26.UPW	ZP_15541194	Outer membrane protease	family A26 unassigned peptidases
MER0223933	sp029434	A26.UPW	ZP_11176989	outer membrane protease	family A26 unassigned peptidases
MER0313402	sp000381	A26.UPW	YP_006479756	outer membrane protease	family A26 unassigned peptidases
MER0319826	sp028150	A26.UPW	ZP_10412894	outer membrane protease	family A26 unassigned peptidases
MER0319827	sp016374	A26.UPW	ZP_10137676	outer membrane protease	family A26 unassigned peptidases
MER0320016	sp000866	A26.UPW	EJA98571	outer membrane protease	family A26 unassigned peptidases
MER0320022	sp028077	A26.UPW	ZP_10184808	outer membrane protease	family A26 unassigned peptidases
MER0492867	sp001993	A26.UPW	BAN09850	outer membrane protease	family A26 unassigned peptidases
MER0195606	sp000399	A26.UPW	CBA19191	outer membrane protease precursor	family A26 unassigned peptidases
MER0014360	sp001993	A26.UPW	Q98A65	Outer membrane serine protease	family A26 unassigned peptidases
MER0195647	sp001139	A26.UPW	YP_004298913	Peptidase A26 omptin	family A26 unassigned peptidases
MER0195682	sp000868	A26.UPW	EHS48704	peptidase A26 omptin	family A26 unassigned peptidases
MER0224651	sp027154	A26.UPW	ZP_13494334	peptidase A26 omptin	family A26 unassigned peptidases
MER0195459	sp027355	A26.UPW	EIJ69831	peptidase, A26 omptin family protein	family A26 unassigned peptidases
MER0322456	sp027355	A26.UPW	ZP_15947601	peptidase, A26 omptin family protein	family A26 unassigned peptidases
MER0195662	sp023082	A26.UPW	ZP_05887679	PlaA	family A26 unassigned peptidases
MER0224659	sp000403	A26.UPW	ZP_19639256	protease 7, partial	family A26 unassigned peptidases
MER0184827	sp020916	A26.UPW	ZP_04861347	protease VII	family A26 unassigned peptidases
MER0070471	sp011161	A26.UPW	ZP_19179017	Protease VII precursor	family A26 unassigned peptidases
MER0221127	sp029432	A26.UPW	ZP_19152292	Protease VII precursor	family A26 unassigned peptidases
MER0195610	sp004447	A26.UPW	AFJ46923	putative OmpT outer membrane protease	family A26 unassigned peptidases
MER0195651	sp000591	A26.UPW	CBJ12091	putative plasminogen activator protein	family A26 unassigned peptidases
MER0050165	sp003745	A26.UPW	ZP_00613805	similar to Outer membrane protease	family A26 unassigned peptidases
MER0061720	sp027192	A26.UPW	YP_005473965	unnamed protein product	family A26 unassigned peptidases
MER0195672	sp023825	A26.UPW	YP_003967619	unnamed protein product	family A26 unassigned peptidases
MER0698133	sp000842	A28.UPA	I4CXE2	Aspartyl protease	subfamily A28A unassigned peptidases
MER0699478	sp000842	A28.UPA	A0A0D9AE21	Aspartyl protease	subfamily A28A unassigned peptidases
MER0699496	sp000842	A28.UPA	A0A0C2S801	Aspartyl protease	subfamily A28A unassigned peptidases
MER0699500	sp000842	A28.UPA	F8H9Z5	Aspartyl protease	subfamily A28A unassigned peptidases
MER0699728	sp000842	A28.UPA	M2UWN0	Aspartyl protease	subfamily A28A unassigned peptidases
MER0699490	sp000842	A28.UPA	L0GRV1	Clan AA aspartic protease, TIGR02281 family	subfamily A28A unassigned peptidases
MER0427534	sp000020	A28.UPA	YP_005502249	hypothetical protein APA42C_18300	subfamily A28A unassigned peptidases
MER0427726	sp005505	A28.UPA	ZP_08645943	hypothetical protein ATPR_2251	subfamily A28A unassigned peptidases
MER0427739	sp027475	A28.UPA	ZP_08901275	hypothetical protein GeurL1_02493	subfamily A28A unassigned peptidases
MER0427738	sp027476	A28.UPA	ZP_08898754	hypothetical protein Gobo1_10487	subfamily A28A unassigned peptidases
MER0427647	sp003586	A28.UPA	YP_191945	hypothetical protein GOX1548	subfamily A28A unassigned peptidases
MER0699536	sp005467	A28.UPA	Q21F23	Putative aspartyl protease	subfamily A28A unassigned peptidases
MER0699658	sp029427	A28.UPA	K9E1T8	TIGR02281 family clan AA aspartic protease	subfamily A28A unassigned peptidases
MER0699615	sp000842	A28.UPA	I7ACL3	Uncharacterized protein	subfamily A28A unassigned peptidases
MER0699863	sp002272	A28.UPA	R0D5D6	Uncharacterized protein	subfamily A28A unassigned peptidases
MER0700534	sp000866	A28.UPB	J0H3R0	Clan AA aspartic protease, TIGR02281 family	subfamily A28B unassigned peptidases
MER0700748	sp000866	A28.UPB	J0V6W5	Clan AA aspartic protease, TIGR02281 family	subfamily A28B unassigned peptidases
MER0427597	sp005405	A28.UPB	YP_001684388	peptidase A2A	subfamily A28B unassigned peptidases
MER0427609	sp022656	A28.UPB	YP_003594010	peptidase A2A	subfamily A28B unassigned peptidases
MER0427651	sp002260	A28.UPB	YP_497900	peptidase A2A	subfamily A28B unassigned peptidases
MER0427829	sp022656	A28.UPB	YP_003593054	peptidase A2A	subfamily A28B unassigned peptidases
MER0151639	sp028106	A28.UPB	AFK04078	peptidase M28	subfamily A28B unassigned peptidases
MER0427625	sp024551	A28.UPB	YP_004533957	putative peptidase A2A	subfamily A28B unassigned peptidases
MER0427752	sp027141	A28.UPB	ZP_09193121	putative peptidase A2A	subfamily A28B unassigned peptidases
MER0701049	sp028056	A28.UPB	I4CBV2	Tetratricopeptide repeat protein	subfamily A28B unassigned peptidases
MER0700279	sp003176	A28.UPB	L7CBB6	Uncharacterized protein	subfamily A28B unassigned peptidases
MER0700385	sp000866	A28.UPB	B5ZXI1	Uncharacterized protein	subfamily A28B unassigned peptidases
MER0700702	sp000040	A28.UPB	G6XXB0	Uncharacterized protein	subfamily A28B unassigned peptidases
MER0700866	sp004027	A28.UPB	Q2NDV0	Uncharacterized protein	subfamily A28B unassigned peptidases
MER0701026	sp000866	A28.UPB	Q1MMV9	Uncharacterized protein	subfamily A28B unassigned peptidases
MER0151383	sp000246	A32.001	B8H4J3	Aspartyl protease perP	PerP peptidase
MER0241633	sp022656	A32.001	YP_003592698	aspartyl protease PerP	PerP peptidase
MER0232929	sp020829	A32.001	EHB75057	aspartyl protease-like protein	PerP peptidase
MER0241781	sp020829	A32.001	YP_003755988	aspartyl protease-like protein	PerP peptidase
MER0233978	sp027450	A32.001	ZP_10080888	clan AA aspartic protease, TIGR02281 family	PerP peptidase
MER0234043	sp000388	A32.001	ZP_09647772	clan AA aspartic protease, TIGR02281 family	PerP peptidase
MER0241636	sp018559	A32.001	ZP_05033681	conserved hypothetical protein TIGR02281, putative	PerP peptidase
MER0241831	sp000188	A32.001	NP_770376	hypothetical protein bll3736	PerP peptidase
MER0241796	sp011236	A32.001	YP_001206688	hypothetical protein BRADO4743	PerP peptidase
MER0241634	sp005405	A32.001	YP_001683670	hypothetical protein Caul_2044	PerP peptidase
MER0241725	sp024058	A32.001	ZP_08072495	hypothetical protein Met49242DRAFT_1883	PerP peptidase
MER0241798	sp003925	A32.001	YP_576750	hypothetical protein Nham_1468	PerP peptidase
MER0241800	sp004898	A32.001	YP_317825	hypothetical protein Nwi_1211	PerP peptidase
MER0241732	sp002760	A32.001	YP_780901	hypothetical protein RPE_1977	PerP peptidase
MER0265831	sp029475	A32.001	ZP_11419260	TIGR02281 family clan AA aspartic protease	PerP peptidase
MER0233899	sp000188	A32.001	YP_005610994	unnamed protein product	PerP peptidase
MER0233913	sp027194	A32.001	YP_005451819	unnamed protein product	PerP peptidase
MER0110680	sp000842	A32.UPW	YP_001171381	aspartyl protease	family A32 unassigned peptidases
MER0233858	sp027160	A32.UPW	ZP_09140410	aspartyl protease	family A32 unassigned peptidases
MER0265824	sp029486	A32.UPW	ZP_19203819	aspartyl protease	family A32 unassigned peptidases
MER0233051	sp027151	A32.UPW	ZP_09710847	aspartyl protease family protein	family A32 unassigned peptidases
MER0234055	sp027149	A32.UPW	ZP_09285448	aspartyl protease family protein	family A32 unassigned peptidases
MER0233417	sp024539	A32.UPW	YP_004472766	aspartyl protease-like protein	family A32 unassigned peptidases
MER0234305	sp027172	A32.UPW	ZP_09695043	aspartyl protease-like protein	family A32 unassigned peptidases
MER0234802	sp023361	A32.UPW	YP_004390614	aspartyl protease-like protein	family A32 unassigned peptidases
MER0241773	sp003272	A32.UPW	YP_001189328	aspartyl protease-like protein	family A32 unassigned peptidases
MER0241817	sp003935	A32.UPW	YP_616471	aspartyl protease-like protein	family A32 unassigned peptidases
MER0241945	sp005131	A32.UPW	YP_974066	aspartyl protease-like protein	family A32 unassigned peptidases
MER0241982	sp020874	A32.UPW	YP_003522901	aspartyl protease-like protein	family A32 unassigned peptidases
MER0325228	sp002267	A32.UPW	ZP_10763059	aspartyl protease-like protein	family A32 unassigned peptidases
MER0427593	sp005452	A32.UPW	YP_001230745	aspartyl protease-like protein	family A32 unassigned peptidases
MER0233610	sp004436	A32.UPW	ZP_09753401	clan AA aspartic protease, TIGR02281 family	family A32 unassigned peptidases
MER0234389	sp027436	A32.UPW	ZP_10114339	clan AA aspartic protease, TIGR02281 family	family A32 unassigned peptidases
MER0241913	sp025096	A32.UPW	ACT49842	conserved hypothetical protein	family A32 unassigned peptidases
MER0241888	sp018939	A32.UPW	ZP_05094368	conserved hypothetical protein TIGR02281, putative	family A32 unassigned peptidases
MER0232916	sp024943	A32.UPW	ZP_08526234	hypothetical protein AGRO_0203	family A32 unassigned peptidases
MER0241869	sp005131	A32.UPW	YP_986968	hypothetical protein Ajs_2751	family A32 unassigned peptidases
MER0241849	sp023361	A32.UPW	YP_004126143	hypothetical protein Alide_1496	family A32 unassigned peptidases
MER0234314	sp000238	A32.UPW	ZP_09503587	hypothetical protein AlS89_06560	family A32 unassigned peptidases
MER0232958	sp000040	A32.UPW	EHH04724	hypothetical protein ATCR1_16483	family A32 unassigned peptidases
MER0241721	sp000040	A32.UPW	NP_353170	hypothetical protein Atu0134	family A32 unassigned peptidases
MER0241884	sp005210	A32.UPW	YP_933685	hypothetical protein azo2181	family A32 unassigned peptidases
MER0232814	sp000188	A32.UPW	NP_774767	hypothetical protein bll8127	family A32 unassigned peptidases
MER0241786	sp004004	A32.UPW	YP_548431	hypothetical protein Bpro_1595	family A32 unassigned peptidases
MER0233154	sp004025	A32.UPW	YP_004753883	hypothetical protein CFU_3236	family A32 unassigned peptidases
MER0232817	sp024971	A32.UPW	ZP_08627498	hypothetical protein CSIRO_0559	family A32 unassigned peptidases
MER0241907	sp003220	A32.UPW	YP_001565796	hypothetical protein Daci_4782	family A32 unassigned peptidases
MER0241703	sp004026	A32.UPW	YP_286226	hypothetical protein Daro_3026	family A32 unassigned peptidases
MER0278927	sp024547	A32.UPW	AEF89092	hypothetical protein DelCs14_2072	family A32 unassigned peptidases
MER0241866	sp022246	A32.UPW	YP_002553679	hypothetical protein Dtpsy_2241	family A32 unassigned peptidases
MER0241777	sp018667	A32.UPW	YP_159933	hypothetical protein ebA5121	family A32 unassigned peptidases
MER0241825	sp007973	A32.UPW	ZP_01438372	hypothetical protein FP2506_11006	family A32 unassigned peptidases
MER0260687	sp027153	A32.UPW	ZP_08896125	hypothetical protein HMPREF0989_04371	family A32 unassigned peptidases
MER0110750	sp029781	A32.UPW	ZP_21466715	hypothetical protein Jab_2c35220	family A32 unassigned peptidases
MER0219787	sp004175	A32.UPW	ZP_09331069	hypothetical protein KYG_20163	family A32 unassigned peptidases
MER0241876	sp024931	A32.UPW	YP_003673572	hypothetical protein M301_0611	family A32 unassigned peptidases
MER0427836	sp025006	A32.UPW	ZP_09902410	hypothetical protein MalbB_17067	family A32 unassigned peptidases
MER0427831	sp002806	A32.UPW	YP_112843	hypothetical protein MCA0310	family A32 unassigned peptidases
MER0241859	sp003998	A32.UPW	YP_546243	hypothetical protein Mfla_2135	family A32 unassigned peptidases
MER0241754	sp012125	A32.UPW	YP_001352529	hypothetical protein mma_0839	family A32 unassigned peptidases
MER0241896	sp020806	A32.UPW	YP_003048039	hypothetical protein Mmol_0602	family A32 unassigned peptidases
MER0241902	sp023591	A32.UPW	YP_004039038	hypothetical protein MPQ_0620	family A32 unassigned peptidases
MER0241644	sp003925	A32.UPW	YP_575807	hypothetical protein Nham_0457	family A32 unassigned peptidases
MER0241646	sp004898	A32.UPW	YP_316979	hypothetical protein Nwi_0360	family A32 unassigned peptidases
MER0241779	sp000835	A32.UPW	ZP_01367480	hypothetical protein PaerPA_01004632	family A32 unassigned peptidases
MER0233058	sp027154	A32.UPW	EHS52409	hypothetical protein PDO_0037	family A32 unassigned peptidases
MER0241771	sp005435	A32.UPW	YP_981317	hypothetical protein Pnap_1079	family A32 unassigned peptidases
MER0265747	sp029434	A32.UPW	ZP_11174715	hypothetical protein QWE_05943	family A32 unassigned peptidases
MER0241702	sp000865	A32.UPW	YP_467746	hypothetical protein RHE_CH00195	family A32 unassigned peptidases
MER0241671	sp000865	A32.UPW	YP_001976413	hypothetical protein RHECIAT_CH0000240	family A32 unassigned peptidases
MER0241674	sp000866	A32.UPW	YP_002978243	hypothetical protein Rleg_4466	family A32 unassigned peptidases
MER0241690	sp000866	A32.UPW	YP_002283666	hypothetical protein Rleg2_4178	family A32 unassigned peptidases
MER0241668	sp002760	A32.UPW	YP_001989570	hypothetical protein Rpal_0535	family A32 unassigned peptidases
MER0241670	sp002760	A32.UPW	YP_484128	hypothetical protein RPB_0506	family A32 unassigned peptidases
MER0241661	sp002760	A32.UPW	YP_534694	hypothetical protein RPC_4853	family A32 unassigned peptidases
MER0241696	sp002760	A32.UPW	YP_567442	hypothetical protein RPD_0303	family A32 unassigned peptidases
MER0241649	sp002760	A32.UPW	YP_783716	hypothetical protein RPE_4817	family A32 unassigned peptidases
MER0325415	sp028184	A32.UPW	ZP_10380910	hypothetical protein SCD_00473	family A32 unassigned peptidases
MER0241912	sp005467	A32.UPW	YP_528918	hypothetical protein Sde_3451	family A32 unassigned peptidases
MER0325598	sp028105	A32.UPW	ZP_10421804	hypothetical protein SPAM26_00260	family A32 unassigned peptidases
MER0265877	sp029368	A32.UPW	ZP_10958267	hypothetical protein SPAM266_13653	family A32 unassigned peptidases
MER0241752	sp004023	A32.UPW	YP_314635	hypothetical protein Tbd_0877	family A32 unassigned peptidases
MER0241883	sp023022	A32.UPW	YP_003643055	hypothetical protein Tint_1338	family A32 unassigned peptidases
MER0241836	sp016100	A32.UPW	YP_002889641	hypothetical protein Tmz1t_2662	family A32 unassigned peptidases
MER0241763	sp018386	A32.UPW	YP_002945652	hypothetical protein Vapar_3770	family A32 unassigned peptidases
MER0241723	sp018386	A32.UPW	YP_004156644	hypothetical protein Varpa_4364	family A32 unassigned peptidases
MER0241865	sp005129	A32.UPW	YP_998204	hypothetical protein Veis_3465	family A32 unassigned peptidases
MER0241860	sp023409	A32.UPW	CAZ88341	hypothetical protein; putative exported protein	family A32 unassigned peptidases
MER0241834	sp004357	A32.UPW	YP_001022228	peptidase	family A32 unassigned peptidases
MER0241835	sp016794	A32.UPW	YP_001790275	peptidase aspartic family	family A32 unassigned peptidases
MER0233167	sp024961	A32.UPW	ZP_08505758	Putative aspartyl protease	family A32 unassigned peptidases
MER0241911	sp005069	A32.UPW	YP_662951	putative peptidase A2A	family A32 unassigned peptidases
MER0241712	sp005330	A32.UPW	YP_001099178	putative signal peptide	family A32 unassigned peptidases
MER0241643	sp023355	A32.UPW	ZP_07025811	retroviral aspartyl protease domain protein	family A32 unassigned peptidases
MER0241897	sp000836	A32.UPW	YP_257691	retroviral aspartyl protease domain-containing protein	family A32 unassigned peptidases
MER0241969	sp022664	A32.UPW	ZP_06421205	tetratricopeptide repeat protein	family A32 unassigned peptidases
MER0265605	sp029476	A32.UPW	ZP_11424847	TIGR02281 family clan AA aspartic protease	family A32 unassigned peptidases
MER0265622	sp029477	A32.UPW	ZP_11429984	TIGR02281 family clan AA aspartic protease	family A32 unassigned peptidases
MER0110756	sp002267	A32.UPW	ZP_21058997	Transporter	family A32 unassigned peptidases
MER0232868	sp024902	A32.UPW	YP_005029416	unnamed protein product	family A32 unassigned peptidases
MER0234336	sp003283	A32.UPW	YP_005436249	unnamed protein product	family A32 unassigned peptidases
MER0235519	sp026709	A32.UPW	YP_004915512	unnamed protein product	family A32 unassigned peptidases
MER0287592	sp003272	A32.UPW	YP_004382016	unnamed protein product	family A32 unassigned peptidases
MER0428706	sp004344	C01.125	ZP_09148850	hypothetical protein HMPREF9473_00912	Cwp84 peptidase
MER0069534	sp000592	C01.128	YP_003619929	cysteine protease, papain C1 family	subfamily C1A unassigned peptidases
MER0069535	sp000592	C01.128	YP_001249850	hypothetical protein LPC_0519	subfamily C1A unassigned peptidases
MER0052800	sp004050	C01.156	ACL13528	cysteine protease	CysP peptidase
MER0428094	sp023378	C01.156	CBL14836	Cysteine protease	subfamily C1A unassigned peptidases
MER0428098	sp023564	C01.156	CBL38784	Cysteine protease	subfamily C1A unassigned peptidases
MER0158653	sp015944	C01.156	EDS22683	hypothetical protein CLOSS21_00516	subfamily C1A unassigned peptidases
MER0030409	sp000691	C01.156	F8WJY5_MYCGA	unique hypothetical	CysP peptidase
MER0428520	sp020752	C01.160	ZP_03762684	hypothetical protein CLOSTASPAR_06726	morrenain b I
MER0428149	sp004344	C01.160	EFC98077	lysozyme	morrenain b I
MER0031642	sp001131	C01.164	CYSP2	cysteine peptidase CysP2	CPXaC peptidase
MER0031234	sp002535	C01.164	Q8PIP2	Cysteine protease	CPXaC peptidase
MER0034527	sp001131	C01.164	Q8P7B8	Cysteine protease	CPXaC peptidase
MER0048490	sp002015	C01.164	ACD58017	cysteine protease	CPXaC peptidase
MER0159225	sp002015	C01.164	YP_005627937	cysteine protease	CPXaC peptidase
MER0236616	sp011101	C01.164	YP_003376539	cysteine protease	CPXaC peptidase
MER0273972	sp024878	C01.164	YP_004852351	cysteine protease	CPXaC peptidase
MER0428597	sp020763	C01.164	ZP_06730598	cysteine protease	CPXaC peptidase
MER0701824	sp029423	C01.164	L7FSD5	Cysteine protease	CPXaC peptidase
MER0704073	sp029423	C01.164	L7HCX7	Cysteine protease	CPXaC peptidase
MER0027593	sp020763	C01.164	YP_008638546	hypothetical protein	CPXaC peptidase
MER0132858	sp018401	C01.164	GEBA2500495193	hypothetical protein	CPXaC peptidase
MER0501744	sp030784	C01.164	YP_008676588	hypothetical protein	subfamily C1A unassigned peptidases
MER0428740	sp001944	C01.164	ZP_09881791	papain cysteine protease family protein	CPXaC peptidase
MER0704497	sp001131	C01.164	A0A077SAE8	Papain cysteine protease family protein	CPXaC peptidase
MER0428658	sp018742	C01.164	ZP_08189266	Papain family cysteine protease	CPXaC peptidase
MER0705347	sp002535	C01.164	A0A0A6TXL0	Peptidase C1	CPXaC peptidase
MER0705394	sp001131	C01.164	A0A0E3UGS8	Peptidase C1	CPXaC peptidase
MER0428738	sp027321	C01.164	ZP_09836667	peptidase C1A papain	CPXaC peptidase
MER0055953	sp000279	C01.164	EAP61632	peptidase C1A, papain	subfamily C1A unassigned peptidases
MER0062306	sp001131	C01.164	YP_364744	putative cysteine protease precursor	CPXaC peptidase
MER0081835	sp002035	C01.167	CAJ68619	cell surface protein	Cwp13
MER0428590	sp023068	C01.167	ZP_06424338	cell surface protein	subfamily C1A unassigned peptidases
MER0116535	sp014565	C01.167	BAG08527	conserved hypothetical protein	subfamily C1A unassigned peptidases
MER0428602	sp014565	C01.167	ZP_06945834	conserved hypothetical protein	subfamily C1A unassigned peptidases
MER0198274	sp020807	C01.167	ACR76481	cysteine proteinase	subfamily C1A unassigned peptidases
MER0158650	sp015937	C01.167	EDR98016	hypothetical protein ANACAC_01639	subfamily C1A unassigned peptidases
MER0158651	sp015937	C01.167	EDR98244	hypothetical protein ANACAC_01869	subfamily C1A unassigned peptidases
MER0158807	sp018758	C01.167	EEA84168	hypothetical protein CLOHIR_02186	subfamily C1A unassigned peptidases
MER0428631	sp023662	C01.167	ZP_07525579	papain family cysteine protease	subfamily C1A unassigned peptidases
MER0231477	sp023163	C01.167	YP_004090363	peptidase C1A papain	subfamily C1A unassigned peptidases
MER0428632	sp023580	C01.167	ZP_07627372	peptidase C1-like protein	subfamily C1A unassigned peptidases
MER0133504	sp027207	C01.167	YP_005269513	unnamed protein product	subfamily C1A unassigned peptidases
MER0231355	sp027100	C01.167	YP_005050300	unnamed protein product	subfamily C1A unassigned peptidases
MER0426651	sp028053	C01.UNA	I3YLW0	Aminopeptidase C	subfamily C1A non peptidase homologues
MER0702562	sp019191	C01.UNA	R5K3D6	Aminopeptidase C	subfamily C1A non peptidase homologues
MER0703426	sp029372	C01.UNA	S0GGZ3	Bleomycin hydrolase	subfamily C1A non peptidase homologues
MER0703732	sp023437	C01.UNA	D7JCM1	Cysteine peptidase	subfamily C1A non peptidase homologues
MER0702952	sp025030	C01.UNA	F8N6M8	Cysteine peptidase family protein	subfamily C1A non peptidase homologues
MER0705515	sp027485	C01.UNA	I2F6S3	Cysteine protease	subfamily C1A non peptidase homologues
MER0554803	sp028061	C01.UNA	I4B704	Fibronectin type III domain protein	subfamily C1A non peptidase homologues
MER0247522	sp024545	C01.UNA	YP_004451038	hypothetical protein Halhy_6346	subfamily C1A non peptidase homologues
MER0702701	sp000148	C01.UNA	A0A078Q4A5	Papain cysteine protease family protein	subfamily C1A non peptidase homologues
MER0704985	sp018889	C01.UNA	R6BRA2	Putative cysteine peptidase	subfamily C1A non peptidase homologues
MER0596587	sp030950	C01.UNA	M4RET1	Uncharacterized protein	subfamily C1A non peptidase homologues
MER0691663	sp002996	C01.UNA	K2AP94	Uncharacterized protein	subfamily C1A non peptidase homologues
MER0694423	sp019508	C01.UNA	R5DHQ5	Uncharacterized protein	subfamily C1A non peptidase homologues
MER0694630	sp002996	C01.UNA	K1Z3A5	Uncharacterized protein	subfamily C1A non peptidase homologues
MER0702345	sp027341	C01.UNA	R6V0M7	Uncharacterized protein	subfamily C1A non peptidase homologues
MER0702512	sp027359	C01.UNA	H8GTR0	Uncharacterized protein	subfamily C1A non peptidase homologues
MER0703054	sp029372	C01.UNA	A0A0F5JH84	Uncharacterized protein	subfamily C1A non peptidase homologues
MER0703470	sp019508	C01.UNA	R5DM45	Uncharacterized protein	subfamily C1A non peptidase homologues
MER0703874	sp029372	C01.UNA	K6APQ2	Uncharacterized protein	subfamily C1A non peptidase homologues
MER0704554	sp018859	C01.UNA	R6HJV1	Uncharacterized protein	subfamily C1A non peptidase homologues
MER0133440	sp027207	C01.UNA	YP_005269211	unnamed protein product	subfamily C1A non peptidase homologues
MER0184167	sp020898	C01.UNB	ZP_03782573	hypothetical protein RUMHYD_02022	subfamily C1B non peptidase homologues
MER0428723	sp027345	C01.UNB	ZP_09549703	peptidase C1B bleomycin hydrolase	subfamily C1B non peptidase homologues
MER0126843	sp004859	C01.UNW	ACF07231	cysteine protease	family C1 non peptidase homologues
MER0428739	sp027341	C01.UPA	ZP_09861301	aminopeptidase	subfamily C1A unassigned peptidases
MER0064697	sp018400	C01.UPA	ZP_07865507	aminopeptidase C	subfamily C1A unassigned peptidases
MER0066230	sp002947	C01.UPA	NP_810702	aminopeptidase C	subfamily C1A unassigned peptidases
MER0095620	sp011407	C01.UPA	YP_001303602	aminopeptidase C	subfamily C1A unassigned peptidases
MER0095653	sp011407	C01.UPA	YP_001304242	aminopeptidase C	subfamily C1A unassigned peptidases
MER0106135	sp012335	C01.UPA	ZP_01885097	aminopeptidase C	subfamily C1A unassigned peptidases
MER0278969	sp020949	C01.UPA	EFK59430	aminopeptidase C	subfamily C1A unassigned peptidases
MER0278994	sp026612	C01.UPA	EFV03129	aminopeptidase C	subfamily C1A unassigned peptidases
MER0279157	sp020942	C01.UPA	EFK33612	aminopeptidase C	subfamily C1A unassigned peptidases
MER0279769	sp025004	C01.UPA	EGQ16299	aminopeptidase C	subfamily C1A unassigned peptidases
MER0345816	sp027387	C01.UPA	ZP_09894627	aminopeptidase C	subfamily C1A unassigned peptidases
MER0345819	sp028121	C01.UPA	YP_006527198	aminopeptidase C	subfamily C1A unassigned peptidases
MER0345820	sp027108	C01.UPA	YP_004988098	aminopeptidase C	subfamily C1A unassigned peptidases
MER0345824	sp028131	C01.UPA	ZP_10731823	aminopeptidase C	subfamily C1A unassigned peptidases
MER0345825	sp027386	C01.UPA	YP_006255439	aminopeptidase C	subfamily C1A unassigned peptidases
MER0345831	sp027252	C01.UPA	YP_006427301	aminopeptidase C	subfamily C1A unassigned peptidases
MER0428084	sp022666	C01.UPA	CBK64108	Aminopeptidase C	subfamily C1A unassigned peptidases
MER0428418	sp011791	C01.UPA	YP_001301100	aminopeptidase C	subfamily C1A unassigned peptidases
MER0428487	sp010677	C01.UPA	ZP_01694701	aminopeptidase C	subfamily C1A unassigned peptidases
MER0428489	sp012335	C01.UPA	ZP_01885522	aminopeptidase C	subfamily C1A unassigned peptidases
MER0428585	sp022669	C01.UPA	ZP_07883252	aminopeptidase C	subfamily C1A unassigned peptidases
MER0428628	sp023557	C01.UPA	ZP_07364814	aminopeptidase C	subfamily C1A unassigned peptidases
MER0428647	sp024908	C01.UPA	ZP_08084451	aminopeptidase C	subfamily C1A unassigned peptidases
MER0428652	sp024920	C01.UPA	ZP_08135695	aminopeptidase C	subfamily C1A unassigned peptidases
MER0428660	sp024967	C01.UPA	ZP_08202101	aminopeptidase C	subfamily C1A unassigned peptidases
MER0428661	sp024967	C01.UPA	ZP_08202102	aminopeptidase C	subfamily C1A unassigned peptidases
MER0428681	sp025071	C01.UPA	ZP_08672484	aminopeptidase C	subfamily C1A unassigned peptidases
MER0428684	sp024916	C01.UPA	ZP_08675659	aminopeptidase C	subfamily C1A unassigned peptidases
MER0428690	sp024888	C01.UPA	ZP_08818465	aminopeptidase C	subfamily C1A unassigned peptidases
MER0345829	sp024604	C01.UPA	YP_004741195	aminopeptidase G	subfamily C1A unassigned peptidases
MER0428153	sp020897	C01.UPA	EFE13078	bacterial group 2 Ig-like protein	subfamily C1A unassigned peptidases
MER0428185	sp014565	C01.UPA	EGS32937	bacterial Ig-like domain, group 2	subfamily C1A unassigned peptidases
MER0428187	sp014565	C01.UPA	EGS34706	bacterial Ig-like domain, group 2	subfamily C1A unassigned peptidases
MER0106102	sp011947	C01.UPA	CAL44424	Bleomycin hydrolase	subfamily C1A unassigned peptidases
MER0428461	sp024884	C01.UPA	YP_004843769	Bleomycin hydrolase	subfamily C1A unassigned peptidases
MER0364071	sp023820	C01.UPA	AFZ56220	Cathepsin L	subfamily C1A unassigned peptidases
MER0704279	sp029423	C01.UPA	L0SZF2	Cathepsin L1	subfamily C1A unassigned peptidases
MER0222162	sp023457	C01.UPA	YP_003831741	cell surface protein	subfamily C1A unassigned peptidases
MER0274296	sp024881	C01.UPA	YP_004837641	cell surface protein	subfamily C1A unassigned peptidases
MER0428752	sp023711	C01.UPA	ZP_10119888	cell surface protein	subfamily C1A unassigned peptidases
MER0705099	sp002035	C01.UPA	T3D6R1	Cell wall binding repeat 2 family protein	subfamily C1A unassigned peptidases
MER0153522	sp002034	C01.UPA	ACL76771	cellulosome protein dockerin type I	subfamily C1A unassigned peptidases
MER0116532	sp014565	C01.UPA	ZP_04018716	conserved hypothetical protein	subfamily C1A unassigned peptidases
MER0345815	sp022665	C01.UPA	ZP_06006757	conserved hypothetical protein	subfamily C1A unassigned peptidases
MER0428523	sp020950	C01.UPA	ZP_04055609	conserved hypothetical protein	subfamily C1A unassigned peptidases
MER0428524	sp000220	C01.UPA	ZP_04057476	conserved hypothetical protein	subfamily C1A unassigned peptidases
MER0428556	sp022663	C01.UPA	ZP_05918371	conserved hypothetical protein	subfamily C1A unassigned peptidases
MER0428613	sp023395	C01.UPA	ZP_07061543	conserved hypothetical protein	subfamily C1A unassigned peptidases
MER0428630	sp023640	C01.UPA	ZP_07399803	conserved hypothetical protein	subfamily C1A unassigned peptidases
MER0152122	sp015083	C01.UPA	ACL03995	conserved repeat domain protein	subfamily C1A unassigned peptidases
MER0428730	sp023603	C01.UPA	ZP_09615714	Curculin domain protein lectin	subfamily C1A unassigned peptidases
MER0428459	sp005343	C01.UPA	YP_004734755	cysteine peptidase	subfamily C1A unassigned peptidases
MER0428581	sp022660	C01.UPA	ZP_06405135	cysteine peptidase	subfamily C1A unassigned peptidases
MER0428587	sp022664	C01.UPA	ZP_06421479	cysteine peptidase	subfamily C1A unassigned peptidases
MER0041864	sp018425	C01.UPA	ZP_04034999	cysteine protease	subfamily C1A unassigned peptidases
MER0062132	sp010740	C01.UPA	EAQ38420	cysteine protease	subfamily C1A unassigned peptidases
MER0062134	sp010741	C01.UPA	EAQ41344	Cysteine protease	subfamily C1A unassigned peptidases
MER0070818	sp000604	C01.UPA	ABJ77508	Cysteine protease	subfamily C1A unassigned peptidases
MER0087328	sp008869	C01.UPA	EAV42215	cysteine protease	subfamily C1A unassigned peptidases
MER0104773	sp018436	C01.UPA	ZP_04489978	cysteine protease	subfamily C1A unassigned peptidases
MER0364214	sp029212	C01.UPA	YP_006996101	cysteine protease	subfamily C1A unassigned peptidases
MER0428090	sp023381	C01.UPA	CBL03846	Cysteine protease	subfamily C1A unassigned peptidases
MER0428095	sp027127	C01.UPA	CBL16308	Cysteine protease	subfamily C1A unassigned peptidases
MER0428096	sp016099	C01.UPA	CBL33992	Cysteine protease	subfamily C1A unassigned peptidases
MER0428526	sp000129	C01.UPA	ZP_04123385	Cysteine protease	subfamily C1A unassigned peptidases
MER0528034	sp019627	C01.UPA	N1MRH4	Cysteine protease	subfamily C1A unassigned peptidases
MER0703172	sp020804	C01.UPA	R5ZYU6	Cysteine protease	subfamily C1A unassigned peptidases
MER0705231	sp028052	C01.UPA	I3YSC1	Cysteine protease	subfamily C1A unassigned peptidases
MER0705386	sp029133	C01.UPA	M1LPX6	Cysteine protease	subfamily C1A unassigned peptidases
MER0180690	sp010677	C01.UPA	ZP_01694633	cysteine protease, putative	subfamily C1A unassigned peptidases
MER0428438	sp023550	C01.UPA	YP_003962149	cysteine proteinase	subfamily C1A unassigned peptidases
MER0428548	sp020831	C01.UPA	ZP_05427438	cysteine proteinase	subfamily C1A unassigned peptidases
MER0428564	sp022954	C01.UPA	ZP_06142181	cysteine proteinase	subfamily C1A unassigned peptidases
MER0125447	sp004859	C01.UPA	ACF07381	hypothetical lipoprotein, cysteine protease	subfamily C1A unassigned peptidases
MER0428435	sp023550	C01.UPA	YP_003959190	hypothetical protein	subfamily C1A unassigned peptidases
MER0497386	sp032700	C01.UPA	YP_007954169	hypothetical protein	CPXaC peptidase
MER0497403	sp032700	C01.UPA	YP_007954543	hypothetical protein	CPXaC peptidase
MER0497665	sp126768	C01.UPA	YP_008737646	hypothetical protein	CPXaC peptidase
MER0497685	sp126768	C01.UPA	YP_008738190	hypothetical protein	CPXaC peptidase
MER0501024	sp000129	C01.UPA	YP_008826120	hypothetical protein	subfamily C1A unassigned peptidases
MER0501105	sp002111	C01.UPA	YP_008591122	hypothetical protein	subfamily C1A unassigned peptidases
MER0507174	sp018607	C01.UPA	YP_007670336	hypothetical protein	subfamily C1A unassigned peptidases
MER0370616	sp002996	C01.UPA	EKD30705	hypothetical protein ACD_77C00487G0015	subfamily C1A unassigned peptidases
MER0428500	sp016084	C01.UPA	ZP_02424431	hypothetical protein ALIPUT_00548	subfamily C1A unassigned peptidases
MER0428492	sp012333	C01.UPA	ZP_01961092	hypothetical protein BACCAC_02718	subfamily C1A unassigned peptidases
MER0428493	sp012333	C01.UPA	ZP_01961978	hypothetical protein BACCAC_03623	subfamily C1A unassigned peptidases
MER0428515	sp020756	C01.UPA	ZP_03681140	hypothetical protein BACCELL_05515	subfamily C1A unassigned peptidases
MER0428503	sp018549	C01.UPA	ZP_03012093	hypothetical protein BACCOP_04025	subfamily C1A unassigned peptidases
MER0428514	sp020001	C01.UPA	ZP_03644359	hypothetical protein BACCOPRO_02744	subfamily C1A unassigned peptidases
MER0228481	sp018859	C01.UPA	EEB26519	hypothetical protein BACDOR_00959	subfamily C1A unassigned peptidases
MER0428507	sp018859	C01.UPA	ZP_03302042	hypothetical protein BACDOR_03436	subfamily C1A unassigned peptidases
MER0428509	sp019191	C01.UPA	ZP_03459069	hypothetical protein BACEGG_01853	subfamily C1A unassigned peptidases
MER0428504	sp018348	C01.UPA	ZP_03015610	hypothetical protein BACINT_03201	subfamily C1A unassigned peptidases
MER0428498	sp012334	C01.UPA	ZP_02068220	hypothetical protein BACOVA_05234	subfamily C1A unassigned peptidases
MER0428506	sp018537	C01.UPA	ZP_03209673	hypothetical protein BACPLE_03350	subfamily C1A unassigned peptidases
MER0428501	sp015938	C01.UPA	ZP_02435330	hypothetical protein BACSTE_01573	subfamily C1A unassigned peptidases
MER0428499	sp012338	C01.UPA	ZP_02069735	hypothetical protein BACUNI_01150	subfamily C1A unassigned peptidases
MER0069668	sp000148	C01.UPA	YP_212808	hypothetical protein BF3195	subfamily C1A unassigned peptidases
MER0215333	sp005404	C01.UPA	YP_003716853	hypothetical protein CA2559_10538	subfamily C1A unassigned peptidases
MER0158606	sp012329	C01.UPA	EDP17167	hypothetical protein CLOBOL_02239	subfamily C1A unassigned peptidases
MER0184166	sp020897	C01.UPA	ZP_03733946	hypothetical protein CLOM621_03989	subfamily C1A unassigned peptidases
MER0428519	sp020752	C01.UPA	ZP_03757382	hypothetical protein CLOSTASPAR_01383	subfamily C1A unassigned peptidases
MER0428517	sp020895	C01.UPA	ZP_03708861	hypothetical protein CLOSTMETH_03622	subfamily C1A unassigned peptidases
MER0428423	sp020804	C01.UPA	YP_002929607	hypothetical protein EUBELI_00124	subfamily C1A unassigned peptidases
MER0428495	sp012357	C01.UPA	ZP_02025265	hypothetical protein EUBVEN_00501	subfamily C1A unassigned peptidases
MER0428496	sp012357	C01.UPA	ZP_02026569	hypothetical protein EUBVEN_01832	subfamily C1A unassigned peptidases
MER0428533	sp021057	C01.UPA	ZP_04454201	hypothetical protein GCWU000342_00188	subfamily C1A unassigned peptidases
MER0428678	sp012334	C01.UPA	ZP_08595337	hypothetical protein HMPREF1017_02445	subfamily C1A unassigned peptidases
MER0428679	sp012334	C01.UPA	ZP_08597425	hypothetical protein HMPREF1017_04533	subfamily C1A unassigned peptidases
MER0428677	sp024911	C01.UPA	ZP_08591778	hypothetical protein HMPREF1018_03796	subfamily C1A unassigned peptidases
MER0428699	sp027652	C01.UPA	ZP_09046160	hypothetical protein HMPREF1020_00239	subfamily C1A unassigned peptidases
MER0428716	sp027442	C01.UPA	ZP_09338981	hypothetical protein HMPREF1033_02327	subfamily C1A unassigned peptidases
MER0345822	sp028067	C01.UPA	ZP_10372519	hypothetical protein HMPREF1071_03387	subfamily C1A unassigned peptidases
MER0428701	sp027147	C01.UPA	ZP_09104290	hypothetical protein HMPREF9138_00762	subfamily C1A unassigned peptidases
MER0428728	sp027520	C01.UPA	ZP_09590235	hypothetical protein HMPREF9140_00353	subfamily C1A unassigned peptidases
MER0428705	sp027394	C01.UPA	ZP_09121135	hypothetical protein HMPREF9332_00692	subfamily C1A unassigned peptidases
MER0428682	sp025071	C01.UPA	ZP_08673035	hypothetical protein HMPREF9419_1267	subfamily C1A unassigned peptidases
MER0279316	sp025104	C01.UPA	EGV34261	hypothetical protein HMPREF9431_00594	subfamily C1A unassigned peptidases
MER0428734	sp027346	C01.UPA	ZP_09641900	hypothetical protein HMPREF9449_00286	subfamily C1A unassigned peptidases
MER0428735	sp027346	C01.UPA	ZP_09642895	hypothetical protein HMPREF9449_01281	subfamily C1A unassigned peptidases
MER0428696	sp027623	C01.UPA	ZP_09023282	hypothetical protein HMPREF9450_02197	subfamily C1A unassigned peptidases
MER0428671	sp024937	C01.UPA	ZP_08474583	hypothetical protein HMPREF9455_02749	subfamily C1A unassigned peptidases
MER0428669	sp024949	C01.UPA	ZP_08468722	hypothetical protein HMPREF9456_00317	subfamily C1A unassigned peptidases
MER0428704	sp027310	C01.UPA	ZP_09114955	hypothetical protein HMPREF9467_01927	subfamily C1A unassigned peptidases
MER0345809	sp000483	C01.UPA	EHO05105	hypothetical protein HMPREF9714_03468	subfamily C1A unassigned peptidases
MER0428205	sp000483	C01.UPA	EHO11840	hypothetical protein HMPREF9715_01934	subfamily C1A unassigned peptidases
MER0428724	sp027519	C01.UPA	ZP_09551944	hypothetical protein HMPREF9944_00208	subfamily C1A unassigned peptidases
MER0428726	sp027519	C01.UPA	ZP_09553606	hypothetical protein HMPREF9944_01870	subfamily C1A unassigned peptidases
MER0124627	sp015106	C01.UPA	ZP_02162092	hypothetical protein KAOT1_03117	subfamily C1A unassigned peptidases
MER0060080	sp011578	C01.UPA	YP_001256795	hypothetical protein MAG386	subfamily C1A unassigned peptidases
MER0272415	sp024870	C01.UPA	YP_004790438	hypothetical protein MPUT_0579	subfamily C1A unassigned peptidases
MER0428497	sp012337	C01.UPA	ZP_02031300	hypothetical protein PARMER_01285	subfamily C1A unassigned peptidases
MER0428511	sp019508	C01.UPA	ZP_03478149	hypothetical protein PRABACTJOHN_03840	subfamily C1A unassigned peptidases
MER0428490	sp012339	C01.UPA	ZP_01890319	hypothetical protein SCB49_14240	subfamily C1A unassigned peptidases
MER0222459	sp020866	C01.UPA	YP_003842512	Kelch repeat type 1-containing protein	subfamily C1A unassigned peptidases
MER0058756	sp000690	C01.UPA	ABC01133	membrane protein, putative	subfamily C1A unassigned peptidases
MER0345580	sp024096	C01.UPA	YP_004195036	outer membrane autotransporter barrel domain-containing protein	subfamily C1A unassigned peptidases
MER0638988	sp000227	C01.UPA	K8E461	Papain cysteine protease family protein	subfamily C1A unassigned peptidases
MER0701991	sp003213	C01.UPA	A0A088TZQ8	Papain cysteine protease family protein	subfamily C1A unassigned peptidases
MER0704017	sp000227	C01.UPA	K8E6R7	Papain cysteine protease family protein	subfamily C1A unassigned peptidases
MER0276049	sp012334	C01.UPA	EFF58916	papain family cysteine protease	subfamily C1A unassigned peptidases
MER0428209	sp027537	C01.UPA	EIE01046	papain family cysteine protease	subfamily C1A unassigned peptidases
MER0428525	sp000220	C01.UPA	ZP_04057560	papain family cysteine protease	subfamily C1A unassigned peptidases
MER0428653	sp018909	C01.UPA	ZP_08169128	papain family cysteine protease	subfamily C1A unassigned peptidases
MER0428654	sp018909	C01.UPA	ZP_08169144	papain family cysteine protease	subfamily C1A unassigned peptidases
MER0702469	sp014565	C01.UPA	D6S805	Papain family cysteine protease	subfamily C1A unassigned peptidases
MER0703729	sp028239	C01.UPA	T0FFC7	Papain family cysteine protease	subfamily C1A unassigned peptidases
MER0703869	sp028238	C01.UPA	V6H9L7	Papain family cysteine protease	subfamily C1A unassigned peptidases
MER0704500	sp029351	C01.UPA	L1Q8U4	Papain family cysteine protease	subfamily C1A unassigned peptidases
MER0704848	sp014565	C01.UPA	D9PP65	Papain family cysteine protease	subfamily C1A unassigned peptidases
MER0705180	sp023643	C01.UPA	D7N8S0	Papain family cysteine protease	subfamily C1A unassigned peptidases
MER0702892	sp024116	C01.UPA	F4QH99	Papain family cysteine protease family protein	subfamily C1A unassigned peptidases
MER0100340	sp016897	C01.UPA	ACI17440	papain family cysteine protease, putative	subfamily C1A unassigned peptidases
MER0147434	sp027206	C01.UPA	YP_005323160	pepC gene product	subfamily C1A unassigned peptidases
MER0703088	sp027310	C01.UPA	N9Z6V7	Peptidase	subfamily C1A unassigned peptidases
MER0705547	sp012329	C01.UPA	R0A2J1	Peptidase	subfamily C1A unassigned peptidases
MER0127377	sp018395	C01.UPA	YP_003152326	peptidase C1A papain	subfamily C1A unassigned peptidases
MER0128823	sp018436	C01.UPA	ADB42442	peptidase C1A papain	subfamily C1A unassigned peptidases
MER0152069	sp015083	C01.UPA	ACL03084	peptidase C1A papain	subfamily C1A unassigned peptidases
MER0184175	sp020866	C01.UPA	ZP_04807294	peptidase C1A papain	subfamily C1A unassigned peptidases
MER0221779	sp023456	C01.UPA	YP_003820943	peptidase C1A papain	subfamily C1A unassigned peptidases
MER0222532	sp020866	C01.UPA	YP_003844264	peptidase C1A papain	subfamily C1A unassigned peptidases
MER0227833	sp023525	C01.UPA	YP_004042979	peptidase c1a papain	subfamily C1A unassigned peptidases
MER0231551	sp023163	C01.UPA	YP_004092625	peptidase C1A papain	subfamily C1A unassigned peptidases
MER0243280	sp024070	C01.UPA	YP_004346556	peptidase C1A papain	subfamily C1A unassigned peptidases
MER0247666	sp024545	C01.UPA	YP_004450437	peptidase C1A papain	subfamily C1A unassigned peptidases
MER0250271	sp024545	C01.UPA	YP_004446198	peptidase C1A papain	subfamily C1A unassigned peptidases
MER0279234	sp023727	C01.UPA	ADY53270	peptidase C1A papain	subfamily C1A unassigned peptidases
MER0280135	sp026676	C01.UPA	ADZ81647	peptidase C1A papain	subfamily C1A unassigned peptidases
MER0345818	sp027385	C01.UPA	ZP_09631348	peptidase C1A papain	subfamily C1A unassigned peptidases
MER0345823	sp027392	C01.UPA	ZP_08846793	peptidase c1a papain	subfamily C1A unassigned peptidases
MER0428135	sp027340	C01.UPA	CCH02889	peptidase C1A papain	subfamily C1A unassigned peptidases
MER0428421	sp016907	C01.UPA	YP_001819875	peptidase C1A papain	subfamily C1A unassigned peptidases
MER0428443	sp023905	C01.UPA	YP_004238643	peptidase C1A papain	subfamily C1A unassigned peptidases
MER0428445	sp023900	C01.UPA	YP_004260638	peptidase C1A papain	subfamily C1A unassigned peptidases
MER0428446	sp023897	C01.UPA	YP_004261741	peptidase C1A papain	subfamily C1A unassigned peptidases
MER0428449	sp024070	C01.UPA	YP_004344399	peptidase C1A papain	subfamily C1A unassigned peptidases
MER0428452	sp024976	C01.UPA	YP_004431408	peptidase C1A papain	subfamily C1A unassigned peptidases
MER0428456	sp024574	C01.UPA	YP_004653987	peptidase C1A papain	subfamily C1A unassigned peptidases
MER0428736	sp027535	C01.UPA	ZP_09658828	peptidase C1A papain	subfamily C1A unassigned peptidases
MER0428553	sp022846	C01.UPA	ZP_05743006	peptidase C1A, papain	subfamily C1A unassigned peptidases
MER0129372	sp018428	C01.UPA	ACU05821	peptidase C1B bleomycin hydrolase	subfamily C1A unassigned peptidases
MER0193996	sp018403	C01.UPA	ACU63612	peptidase C1B bleomycin hydrolase	subfamily C1A unassigned peptidases
MER0235132	sp023788	C01.UPA	YP_004162641	peptidase C1B bleomycin hydrolase	subfamily C1A unassigned peptidases
MER0345830	sp027345	C01.UPA	ZP_09548945	peptidase C1B bleomycin hydrolase	subfamily C1A unassigned peptidases
MER0428427	sp018403	C01.UPA	YP_003120413	peptidase C1B bleomycin hydrolase	subfamily C1A unassigned peptidases
MER0428444	sp024938	C01.UPA	YP_004252532	peptidase C1B bleomycin hydrolase	subfamily C1A unassigned peptidases
MER0428453	sp023605	C01.UPA	YP_004441310	peptidase C1B bleomycin hydrolase	subfamily C1A unassigned peptidases
MER0428668	sp003319	C01.UPA	ZP_08457244	peptidase C1B bleomycin hydrolase	subfamily C1A unassigned peptidases
MER0428674	sp025030	C01.UPA	ZP_08578947	peptidase C1B bleomycin hydrolase	subfamily C1A unassigned peptidases
MER0084766	sp005464	C01.UPA	YP_001193504	peptidase C1B, bleomycin hydrolase	subfamily C1A unassigned peptidases
MER0345813	sp028127	C01.UPA	ZP_10481987	peptidase C1B, bleomycin hydrolase	subfamily C1A unassigned peptidases
MER0428448	sp024085	C01.UPA	YP_004329124	peptidase C1-like family	subfamily C1A unassigned peptidases
MER0083352	sp010740	C01.UPA	ZP_01051312	peptidase C1-like family protein	subfamily C1A unassigned peptidases
MER0271453	sp027518	C01.UPA	ZP_09107241	peptidase C1-like family protein	subfamily C1A unassigned peptidases
MER0279536	sp025003	C01.UPA	EGJ56804	peptidase C1-like family protein	subfamily C1A unassigned peptidases
MER0370642	sp029439	C01.UPA	ZP_19274525	peptidase C1-like family protein	subfamily C1A unassigned peptidases
MER0428576	sp022661	C01.UPA	ZP_06289333	peptidase C1-like family protein	subfamily C1A unassigned peptidases
MER0428664	sp025038	C01.UPA	ZP_08296248	peptidase C1-like family protein	subfamily C1A unassigned peptidases
MER0428665	sp025050	C01.UPA	ZP_08298568	peptidase C1-like family protein	subfamily C1A unassigned peptidases
MER0428666	sp024997	C01.UPA	ZP_08319128	peptidase C1-like family protein	subfamily C1A unassigned peptidases
MER0428667	sp025003	C01.UPA	ZP_08448075	peptidase C1-like family protein	subfamily C1A unassigned peptidases
MER0428703	sp027518	C01.UPA	ZP_09107861	peptidase C1-like family protein	subfamily C1A unassigned peptidases
MER0061219	sp011791	C01.UPA	ZP_06742185	peptidase C1-like protein	subfamily C1A unassigned peptidases
MER0221333	sp020952	C01.UPA	YP_003814032	peptidase C1-like protein	subfamily C1A unassigned peptidases
MER0278882	sp023580	C01.UPA	EFN90826	peptidase C1-like protein	subfamily C1A unassigned peptidases
MER0345828	sp028273	C01.UPA	EJF35544	peptidase C1-like protein	subfamily C1A unassigned peptidases
MER0345835	sp028274	C01.UPA	ZP_10368671	peptidase C1-like protein	subfamily C1A unassigned peptidases
MER0428085	sp023597	C01.UPA	ZP_06764840	peptidase C1-like protein	subfamily C1A unassigned peptidases
MER0428478	sp002222	C01.UPA	YP_006299528	peptidase C1-like protein	subfamily C1A unassigned peptidases
MER0428570	sp022672	C01.UPA	ZP_06267729	peptidase C1-like protein	subfamily C1A unassigned peptidases
MER0428571	sp022672	C01.UPA	ZP_06267950	peptidase C1-like protein	subfamily C1A unassigned peptidases
MER0428594	sp012334	C01.UPA	ZP_06722703	peptidase C1-like protein	subfamily C1A unassigned peptidases
MER0428625	sp023469	C01.UPA	ZP_07322661	peptidase C1-like protein	subfamily C1A unassigned peptidases
MER0428627	sp023469	C01.UPA	ZP_07323147	peptidase C1-like protein	subfamily C1A unassigned peptidases
MER0428633	sp023580	C01.UPA	ZP_07628254	peptidase C1-like protein	subfamily C1A unassigned peptidases
MER0428747	sp027521	C01.UPA	ZP_09966869	peptidase C1-like protein	subfamily C1A unassigned peptidases
MER0203572	sp022652	C01.UPA	ADE82002	peptidase, C1 family	subfamily C1A unassigned peptidases
MER0428441	sp002063	C01.UPA	YP_006018392	Peptidase, cysteine peptidase active site protein	subfamily C1A unassigned peptidases
MER0234924	sp023785	C01.UPA	YP_004151146	PKD domain containing protein	subfamily C1A unassigned peptidases
MER0428565	sp022954	C01.UPA	ZP_06142252	preprotein translocase subunit SecD-like protein	subfamily C1A unassigned peptidases
MER0040007	sp002161	C01.UPA	NP_968531-1	putative aminopeptidase C	subfamily C1A unassigned peptidases
MER0182310	sp020795	C01.UPA	BAH76689	putative cysteine peptidase	subfamily C1A unassigned peptidases
MER0428146	sp022671	C01.UPA	EEX71494	putative cysteine peptidase	subfamily C1A unassigned peptidases
MER0428547	sp018976	C01.UPA	ZP_05417446	putative cysteine peptidase	subfamily C1A unassigned peptidases
MER0428554	sp022668	C01.UPA	ZP_05857064	putative cysteine peptidase	subfamily C1A unassigned peptidases
MER0428567	sp018889	C01.UPA	ZP_06251794	putative cysteine peptidase	subfamily C1A unassigned peptidases
MER0428569	sp022662	C01.UPA	ZP_06256089	putative cysteine peptidase	subfamily C1A unassigned peptidases
MER0428612	sp023395	C01.UPA	ZP_07060863	putative cysteine peptidase	subfamily C1A unassigned peptidases
MER0428549	sp020831	C01.UPA	ZP_05427510	putative cysteine proteinase	Cwp13
MER0428157	sp023085	C01.UPA	EFF67693	putative fibronectin type III domain protein	subfamily C1A unassigned peptidases
MER0428578	sp022847	C01.UPA	ZP_06291882	putative GA module, partial	subfamily C1A unassigned peptidases
MER0428532	sp020934	C01.UPA	ZP_04389192	putative lipoprotein	subfamily C1A unassigned peptidases
MER0030498	sp003176	C01.UPA	Q7UGT6	Similar to cysteine proteinase	subfamily C1A unassigned peptidases
MER0427890	sp000691	C01.UPA	ADH95183	truncated cysteine protease	CysP peptidase
MER0428662	sp020943	C01.UPA	ZP_08240878	UbiD family decarboxylase	subfamily C1A unassigned peptidases
MER0701842	sp028110	C01.UPA	A0A017SUU1	Uncharacterized protein	subfamily C1A unassigned peptidases
MER0702411	sp000113	C01.UPA	J8KHX3	Uncharacterized protein	subfamily C1A unassigned peptidases
MER0703988	sp003213	C01.UPA	A0A071M511	Uncharacterized protein	subfamily C1A unassigned peptidases
MER0704256	sp029348	C01.UPA	K8DXZ6	Uncharacterized protein	subfamily C1A unassigned peptidases
MER0704291	sp022954	C01.UPA	W7UED1	Uncharacterized protein	subfamily C1A unassigned peptidases
MER0705196	sp011578	C01.UPA	I5D6B4	Uncharacterized protein	subfamily C1A unassigned peptidases
MER0701761	sp022847	C01.UPA	A0A096BBS1	Uncharacterized protein (Fragment)	subfamily C1A unassigned peptidases
MER0057174	sp005391	C01.UPA	ABA87309	Uncharacterized protein with a C-terminal OMP domain-like	subfamily C1A unassigned peptidases
MER0145177	sp027210	C01.UPA	YP_005653285	unnamed protein product	subfamily C1A unassigned peptidases
MER0146741	sp027206	C01.UPA	YP_005321928	unnamed protein product	subfamily C1A unassigned peptidases
MER0283003	sp027100	C01.UPA	YP_005050442	unnamed protein product	subfamily C1A unassigned peptidases
MER0231240	sp022662	C01.UPB	ZP_06257093	aminopeptidase	subfamily C1B unassigned peptidases
MER0293430	sp027341	C01.UPB	ZP_09860026	aminopeptidase	subfamily C1B unassigned peptidases
MER0703093	sp000269	C01.UPB	A0A085CF28	Aminopeptidase	subfamily C1B unassigned peptidases
MER0705839	sp018889	C01.UPB	R6BQT2	Aminopeptidase	subfamily C1B unassigned peptidases
MER0231157	sp022665	C01.UPB	EFA44293	aminopeptidase C	subfamily C1B unassigned peptidases
MER0232604	sp022660	C01.UPB	EFC71418	aminopeptidase C	subfamily C1B unassigned peptidases
MER0232875	sp023557	C01.UPB	EFM01354	aminopeptidase C	subfamily C1B unassigned peptidases
MER0233225	sp022668	C01.UPB	EEX19326	aminopeptidase C	subfamily C1B unassigned peptidases
MER0233872	sp020950	C01.UPB	EEK17076	aminopeptidase C	subfamily C1B unassigned peptidases
MER0234098	sp020934	C01.UPB	EEN83590	aminopeptidase C	subfamily C1B unassigned peptidases
MER0242424	sp022669	C01.UPB	ZP_07882506	aminopeptidase C	subfamily C1B unassigned peptidases
MER0277358	sp022671	C01.UPB	EEX72370	aminopeptidase C	subfamily C1B unassigned peptidases
MER0293453	sp023395	C01.UPB	ZP_07059960	aminopeptidase C	subfamily C1B unassigned peptidases
MER0293456	sp026612	C01.UPB	ZP_07963236	aminopeptidase C	subfamily C1B unassigned peptidases
MER0293461	sp025071	C01.UPB	ZP_08673492	aminopeptidase C	subfamily C1B unassigned peptidases
MER0293466	sp024916	C01.UPB	ZP_08674607	aminopeptidase C	subfamily C1B unassigned peptidases
MER0293477	sp024920	C01.UPB	ZP_08136934	aminopeptidase C	subfamily C1B unassigned peptidases
MER0623633	sp028052	C01.UPB	I3YYH5	Aminopeptidase C	subfamily C1B unassigned peptidases
MER0487009	sp024604	C01.UPB	A0A0B7HX31	Aminopeptidase G	subfamily C1B unassigned peptidases
MER0101310	sp003958	C01.UPB	EAM61766	Bleomycin hydrolase	subfamily C1B unassigned peptidases
MER0227847	sp023525	C01.UPB	YP_004043337	bleomycin hydrolase	subfamily C1B unassigned peptidases
MER0235119	sp023788	C01.UPB	YP_004162166	Bleomycin hydrolase	subfamily C1B unassigned peptidases
MER0240506	sp023900	C01.UPB	YP_004257872	Bleomycin hydrolase	subfamily C1B unassigned peptidases
MER0293383	sp003319	C01.UPB	ZP_08458306	Bleomycin hydrolase	subfamily C1B unassigned peptidases
MER0293405	sp024938	C01.UPB	YP_004253351	Bleomycin hydrolase	subfamily C1B unassigned peptidases
MER0293438	sp025030	C01.UPB	ZP_08578873	Bleomycin hydrolase	subfamily C1B unassigned peptidases
MER0106134	sp012333	C01.UPB	EDM22609	hypothetical protein BACCAC_00997	subfamily C1B unassigned peptidases
MER0139870	sp018549	C01.UPB	EDU99581	hypothetical protein BACCOP_03425	subfamily C1B unassigned peptidases
MER0293435	sp020001	C01.UPB	ZP_03642037	hypothetical protein BACCOPRO_00385	subfamily C1B unassigned peptidases
MER0160501	sp018859	C01.UPB	ZP_03301413	hypothetical protein BACDOR_02796	subfamily C1B unassigned peptidases
MER0293421	sp019191	C01.UPB	ZP_03459640	hypothetical protein BACEGG_02431	subfamily C1B unassigned peptidases
MER0139604	sp018537	C01.UPB	EDY96290	hypothetical protein BACPLE_00726	subfamily C1B unassigned peptidases
MER0293419	sp015938	C01.UPB	ZP_02434819	hypothetical protein BACSTE_01050	subfamily C1B unassigned peptidases
MER0106154	sp012338	C01.UPB	EDO54295	hypothetical protein BACUNI_02303	subfamily C1B unassigned peptidases
MER0293474	sp025092	C01.UPB	ZP_08835144	hypothetical protein HMPREF0666_01320	subfamily C1B unassigned peptidases
MER0271512	sp024911	C01.UPB	ZP_08590100	hypothetical protein HMPREF1018_02116	subfamily C1B unassigned peptidases
MER0293441	sp027442	C01.UPB	ZP_09338994	hypothetical protein HMPREF1033_02340	subfamily C1B unassigned peptidases
MER0101302	sp011791	C01.UPB	EIY75283	hypothetical protein HMPREF1058_03144	subfamily C1B unassigned peptidases
MER0345763	sp028181	C01.UPB	ZP_10376071	hypothetical protein HMPREF1068_02351	subfamily C1B unassigned peptidases
MER0345836	sp023597	C01.UPB	EIY88096	hypothetical protein HMPREF1074_00485	subfamily C1B unassigned peptidases
MER0370341	sp029372	C01.UPB	ZP_11293151	hypothetical protein HMPREF1076_02329	subfamily C1B unassigned peptidases
MER0293479	sp027147	C01.UPB	ZP_09105708	hypothetical protein HMPREF9138_02180	subfamily C1B unassigned peptidases
MER0293470	sp027520	C01.UPB	ZP_09589946	hypothetical protein HMPREF9140_00064	subfamily C1B unassigned peptidases
MER0293433	sp027394	C01.UPB	ZP_09121790	hypothetical protein HMPREF9332_01347	subfamily C1B unassigned peptidases
MER0370310	sp029370	C01.UPB	ZP_18879911	hypothetical protein HMPREF9447_00944	subfamily C1B unassigned peptidases
MER0293391	sp027346	C01.UPB	ZP_09643621	hypothetical protein HMPREF9449_02007	subfamily C1B unassigned peptidases
MER0280307	sp024937	C01.UPB	EGJ99663	hypothetical protein HMPREF9455_03926	subfamily C1B unassigned peptidases
MER0293368	sp024949	C01.UPB	ZP_08469838	hypothetical protein HMPREF9456_01433	subfamily C1B unassigned peptidases
MER0106141	sp012337	C01.UPB	EDN87369	hypothetical protein PARMER_01134	subfamily C1B unassigned peptidases
MER0170392	sp019508	C01.UPB	ZP_03477648	hypothetical protein PRABACTJOHN_03336	subfamily C1B unassigned peptidases
MER0162074	sp018889	C01.UPB	ZP_03617788	hypothetical protein PREVCOP_03299	subfamily C1B unassigned peptidases
MER0702134	sp011407	C01.UPB	A0A078TKQ6	Papain cysteine protease family protein	subfamily C1B unassigned peptidases
MER0702757	sp011407	C01.UPB	A0A069S0H5	Papain cysteine protease family protein	subfamily C1B unassigned peptidases
MER0703083	sp000148	C01.UPB	A0A078Q5G6	Papain cysteine protease family protein	subfamily C1B unassigned peptidases
MER0704317	sp011407	C01.UPB	A0A069S9S8	Papain cysteine protease family protein	subfamily C1B unassigned peptidases
MER0653374	sp015938	C01.UPB	R6B887	Peptidase C1-like family	subfamily C1B unassigned peptidases
MER0702604	sp015938	C01.UPB	R6B3K2	Peptidase C1-like family	subfamily C1B unassigned peptidases
MER0702883	sp016084	C01.UPB	R7JGJ5	Peptidase C1-like family	subfamily C1B unassigned peptidases
MER0705851	sp018348	C01.UPB	R5M828	Peptidase C1-like family	subfamily C1B unassigned peptidases
MER0293415	sp024997	C01.UPB	ZP_08321063	peptidase C1-like family protein	subfamily C1B unassigned peptidases
MER0293418	sp025003	C01.UPB	ZP_08449177	peptidase C1-like family protein	subfamily C1B unassigned peptidases
MER0702618	sp029529	C01.UPB	L1NG56	Peptidase C1-like family protein	subfamily C1B unassigned peptidases
MER0705688	sp011407	C01.UPB	A0A069RXZ6	Peptidase C1-like family protein	subfamily C1B unassigned peptidases
MER0705812	sp011407	C01.UPB	A0A078S8U2	Peptidase C1-like family protein	subfamily C1B unassigned peptidases
MER0229774	sp022672	C01.UPB	EFB92192	peptidase C1-like protein	subfamily C1B unassigned peptidases
MER0237396	sp023580	C01.UPB	EFN92044	peptidase C1-like protein	subfamily C1B unassigned peptidases
MER0237585	sp023469	C01.UPB	EFL45848	peptidase C1-like protein	subfamily C1B unassigned peptidases
MER0034581	sp000818	C01.UPB	BAG33027	putative aminopeptidase	subfamily C1B unassigned peptidases
MER0028001	sp002947	C01.UPB	Q8A8K6	putative aminopeptidase C	subfamily C1B unassigned peptidases
MER0095623	sp011407	C01.UPB	YP_001303635	putative aminopeptidase C	subfamily C1B unassigned peptidases
MER0236882	sp023605	C01.UPB	EFR34596	putative aminopeptidase C	subfamily C1B unassigned peptidases
MER0243026	sp024085	C01.UPB	YP_004329403	putative aminopeptidase E	subfamily C1B unassigned peptidases
MER0276825	sp025038	C01.UPB	EGF53245	putative aminopeptidase E	subfamily C1B unassigned peptidases
MER0293425	sp025050	C01.UPB	ZP_08302335	putative aminopeptidase E	subfamily C1B unassigned peptidases
MER0433348	sp029370	C01.UPB	K9DST1	Uncharacterized protein	subfamily C1B unassigned peptidases
MER0538638	sp029372	C01.UPB	S0GEN9	Uncharacterized protein	subfamily C1B unassigned peptidases
MER0694390	sp018859	C01.UPB	R6HI01	Uncharacterized protein	subfamily C1B unassigned peptidases
MER0702212	sp028181	C01.UPB	I9RXM8	Uncharacterized protein	subfamily C1B unassigned peptidases
MER0703767	sp029443	C01.UPB	K0WW62	Uncharacterized protein	subfamily C1B unassigned peptidases
MER0703896	sp011407	C01.UPB	K6B6Y5	Uncharacterized protein	subfamily C1B unassigned peptidases
MER0703920	sp000269	C01.UPB	R9CN12	Uncharacterized protein	subfamily C1B unassigned peptidases
MER0705797	sp011407	C01.UPB	K6AMM2	Uncharacterized protein	subfamily C1B unassigned peptidases
MER0705802	sp019508	C01.UPB	R5D8P9	Uncharacterized protein	subfamily C1B unassigned peptidases
MER0705806	sp011407	C01.UPB	K6A714	Uncharacterized protein	subfamily C1B unassigned peptidases
MER0705970	sp027533	C02.UNA	W0IVT3	Peptidase C2	subfamily C2A non peptidase homologues
MER0242145	sp018398	C02.UPA	YP_003155356	Calpain family cysteine protease	subfamily C2A unassigned peptidases
MER0429494	sp027514	C02.UPA	ZP_09852604	Calpain family cysteine protease	subfamily C2A unassigned peptidases
MER0003948	sp002947	C02.UPA	NP_812871	conserved hypothetical protein	subfamily C2A unassigned peptidases
MER0429495	sp027341	C02.UPA	ZP_09858577	hypothetical protein BfaeM_07015	subfamily C2A unassigned peptidases
MER0241512	sp015945	C02.UPA	ZP_02733073	hypothetical protein GobsU_14824	subfamily C2A unassigned peptidases
MER0242104	sp024062	C02.UPA	ZP_07966539	hypothetical protein HMPREF9336_02911	subfamily C2A unassigned peptidases
MER0204563	sp022657	C02.UPA	YP_003659885	hypothetical protein Srot_2619	subfamily C2A unassigned peptidases
MER0707249	sp027341	C02.UPA	R6UXV3	Uncharacterized protein	subfamily C2A unassigned peptidases
MER0707293	sp018976	C02.UPA	R6S676	Uncharacterized protein	subfamily C2A unassigned peptidases
MER0001346	sp000988	C10.001	SPEB_STRPY	Strepotococcal cysteine protease / Streptococcal pyrogenic exotoxin B	streptopain
MER0291517	sp023693	C10.001	ZP_07824722	streptopain	streptopain
MER0291518	sp025066	C10.001	ZP_08399026	streptopain	streptopain
MER0001723	sp000818	C10.002	PRTT_PORGI	Cysteine protease/haemagglutinin	PrtT peptidase
MER0010975	sp000818	C10.003	PERIOD	thiol protease	periodontain
MER0185164	sp020756	C10.004	ZP_03679365	hypothetical protein BACCELL_03722	interpain A
MER0144401	sp018348	C10.004	EDV05487	hypothetical protein BACINT_04634	interpain A
MER0342866	sp020756	C10.004	EIY17051	hypothetical protein HMPREF1062_06153	interpain A
MER0342865	sp028067	C10.004	ZP_10373485	hypothetical protein HMPREF1071_04353	family C10 unassigned peptidases
MER0291533	sp027147	C10.004	ZP_09104528	hypothetical protein HMPREF9138_01000	interpain A
MER0291542	sp027520	C10.004	ZP_09591792	hypothetical protein HMPREF9140_01910	interpain A
MER0291532	sp024920	C10.004	ZP_08136085	hypothetical protein HMPREF9141_1295	interpain A
MER0352340	sp029370	C10.004	ZP_18883336	hypothetical protein HMPREF9447_04369	interpain A
MER0352332	sp029370	C10.004	ZP_18883350	hypothetical protein HMPREF9447_04383	interpain A
MER0179292	sp018889	C10.004	ZP_03616128	hypothetical protein PREVCOP_01594	interpain A
MER0291549	sp024916	C10.004	ZP_08676520	interpain A	interpain A
MER0243256	sp024085	C10.004	YP_004328690	peptidase C10 family	interpain A
MER0204591	sp022661	C10.004	ZP_06290018	peptidase C10 family protein	interpain A
MER0291547	sp023469	C10.004	ZP_07323329	peptidase C10 family protein	interpain A
MER0352360	sp029529	C10.004	ZP_19273109	peptidase C10 family protein	interpain A
MER0203602	sp022652	C10.004	ADE82295	putative thiol protease/hemagglutinin prtT	interpain A
MER0269815	sp027518	C10.004	ZP_09107008	streptopain domain protein	interpain A
MER0291520	sp025003	C10.004	ZP_08445669	streptopain domain protein	interpain A
MER0185167	sp020950	C10.UPW	ZP_04056036	conserved hypothetical protein	family C10 unassigned peptidases
MER0204651	sp022669	C10.UPW	ZP_07884105	conserved hypothetical protein	interpain A
MER0279395	sp026612	C10.UPW	EFV04246	conserved hypothetical protein	family C10 unassigned peptidases
MER0291523	sp023557	C10.UPW	ZP_07365788	conserved hypothetical protein	interpain A
MER0291528	sp023557	C10.UPW	ZP_07365641	conserved hypothetical protein	family C10 unassigned peptidases
MER0185163	sp016084	C10.UPW	ZP_02426007	hypothetical protein ALIPUT_02165	family C10 unassigned peptidases
MER0204629	sp016084	C10.UPW	ZP_02426009	hypothetical protein ALIPUT_02167	family C10 unassigned peptidases
MER0185165	sp020756	C10.UPW	ZP_03679366	hypothetical protein BACCELL_03723	interpain A
MER0144621	sp018348	C10.UPW	ZP_03015004	hypothetical protein BACINT_02589	family C10 unassigned peptidases
MER0144483	sp018348	C10.UPW	EDV05486	hypothetical protein BACINT_04633	interpain A
MER0117871	sp012338	C10.UPW	ZP_02068835	hypothetical protein BACUNI_00235	family C10 unassigned peptidases
MER0204627	sp002947	C10.UPW	NP_811130	hypothetical protein BT_2217	family C10 unassigned peptidases
MER0204631	sp020942	C10.UPW	ZP_03851876	hypothetical protein HMPREF0204_2669	family C10 unassigned peptidases
MER0291529	sp024908	C10.UPW	ZP_08084950	hypothetical protein HMPREF0663_11486	interpain A
MER0279605	sp025092	C10.UPW	EGW47261	hypothetical protein HMPREF0666_01568	family C10 unassigned peptidases
MER0280133	sp025092	C10.UPW	EGW46720	hypothetical protein HMPREF0666_02211	family C10 unassigned peptidases
MER0291559	sp025092	C10.UPW	ZP_08836313	hypothetical protein HMPREF0666_02489	family C10 unassigned peptidases
MER0291583	sp024911	C10.UPW	ZP_08591621	hypothetical protein HMPREF1018_03639	family C10 unassigned peptidases
MER0342876	sp028181	C10.UPW	ZP_10374730	hypothetical protein HMPREF1068_01010	interpain A
MER0342869	sp028181	C10.UPW	ZP_10374739	hypothetical protein HMPREF1068_01019	interpain A
MER0342875	sp028181	C10.UPW	ZP_10374743	hypothetical protein HMPREF1068_01023	interpain A
MER0342871	sp028067	C10.UPW	ZP_10369909	hypothetical protein HMPREF1071_00777	interpain A
MER0352359	sp029372	C10.UPW	ZP_11291827	hypothetical protein HMPREF1076_01005	interpain A
MER0204608	sp022663	C10.UPW	ZP_05918071	hypothetical protein HMPREF6745_2026	family C10 unassigned peptidases
MER0291557	sp025004	C10.UPW	ZP_08670562	hypothetical protein HMPREF9136_1560	interpain A
MER0291566	sp027147	C10.UPW	ZP_09104376	hypothetical protein HMPREF9138_00848	family C10 unassigned peptidases
MER0291568	sp027147	C10.UPW	ZP_09105438	hypothetical protein HMPREF9138_01910	family C10 unassigned peptidases
MER0291552	sp027147	C10.UPW	ZP_09105888	hypothetical protein HMPREF9138_02360	family C10 unassigned peptidases
MER0291586	sp027520	C10.UPW	ZP_09591603	hypothetical protein HMPREF9140_01721	family C10 unassigned peptidases
MER0291554	sp024920	C10.UPW	ZP_08135302	hypothetical protein HMPREF9141_0511	family C10 unassigned peptidases
MER0279229	sp024916	C10.UPW	EGQ14205	hypothetical protein HMPREF9144_2137	family C10 unassigned peptidases
MER0291570	sp027394	C10.UPW	ZP_09121539	hypothetical protein HMPREF9332_01096	family C10 unassigned peptidases
MER0352334	sp029370	C10.UPW	ZP_18883337	hypothetical protein HMPREF9447_04370	interpain A
MER0291556	sp027519	C10.UPW	ZP_09552385	hypothetical protein HMPREF9944_00649	family C10 unassigned peptidases
MER0291521	sp027519	C10.UPW	ZP_09552478	hypothetical protein HMPREF9944_00742	interpain A
MER0204648	sp022672	C10.UPW	EIM32108	Peptidase C10 family	family C10 unassigned peptidases
MER0243106	sp024085	C10.UPW	YP_004328562	peptidase C10 family	family C10 unassigned peptidases
MER0243298	sp024085	C10.UPW	YP_004328782	peptidase C10 family	family C10 unassigned peptidases
MER0291561	sp027521	C10.UPW	ZP_09967720	peptidase C10 family / Por secretion system C-terminal sorting domain multi-domain protein	family C10 unassigned peptidases
MER0185168	sp020934	C10.UPW	ZP_04389634	Peptidase C10 family protein	family C10 unassigned peptidases
MER0185174	sp020952	C10.UPW	ZP_06408481	peptidase C10 family protein	family C10 unassigned peptidases
MER0204602	sp022660	C10.UPW	ZP_06406254	peptidase C10 family protein	family C10 unassigned peptidases
MER0204609	sp022661	C10.UPW	ZP_06290145	peptidase C10 family protein	interpain A
MER0204623	sp022661	C10.UPW	ZP_06289176	peptidase C10 family protein	family C10 unassigned peptidases
MER0204641	sp022671	C10.UPW	ZP_05735527	peptidase C10 family protein	family C10 unassigned peptidases
MER0223518	sp023469	C10.UPW	ZP_07324342	peptidase C10 family protein	interpain A
MER0278991	sp023469	C10.UPW	EFL46991	peptidase C10 family protein	family C10 unassigned peptidases
MER0279691	sp023469	C10.UPW	EFL45922	peptidase C10 family protein	family C10 unassigned peptidases
MER0291531	sp002222	C10.UPW	YP_006299172	peptidase C10 family protein	interpain A
MER0291548	sp024916	C10.UPW	ZP_08674497	peptidase C10 family protein	family C10 unassigned peptidases
MER0291577	sp025050	C10.UPW	ZP_08299833	peptidase C10 family protein	family C10 unassigned peptidases
MER0291580	sp025003	C10.UPW	ZP_08447961	peptidase C10 family protein	family C10 unassigned peptidases
MER0352347	sp029529	C10.UPW	ZP_19272243	peptidase C10 family protein	interpain A
MER0352376	sp029529	C10.UPW	ZP_19271854	peptidase C10 family protein	family C10 unassigned peptidases
MER0291575	sp024997	C10.UPW	ZP_08320773	peptidase C10 family protein, partial	family C10 unassigned peptidases
MER0291576	sp024997	C10.UPW	ZP_08322350	peptidase C10 family protein, partial	family C10 unassigned peptidases
MER0204597	sp022666	C10.UPW	CBK63179	Peptidase C10 family.	family C10 unassigned peptidases
MER0117752	sp015083	C10.UPW	YP_002433061	peptidase C10 streptopain	family C10 unassigned peptidases
MER0243250	sp024070	C10.UPW	YP_004346544	peptidase C10 streptopain	family C10 unassigned peptidases
MER0291581	sp023750	C10.UPW	ZP_07738774	peptidase C10 streptopain	family C10 unassigned peptidases
MER0291584	sp023750	C10.UPW	ZP_07738776	peptidase C10 streptopain	family C10 unassigned peptidases
MER0249055	sp024545	C10.UPW	YP_004450294	peptidase C10, Streptopain	family C10 unassigned peptidases
MER0352373	sp029443	C10.UPW	ZP_11020113	por secretion system C-terminal sorting domain-containing protein	family C10 unassigned peptidases
MER0279533	sp024920	C10.UPW	EGC20252	PrtT protein	family C10 unassigned peptidases
MER0185172	sp020952	C10.UPW	ZP_04832870	putative interpain A	family C10 unassigned peptidases
MER0204632	sp020934	C10.UPW	ZP_04390456	putative lipoprotein	family C10 unassigned peptidases
MER0204604	sp022664	C10.UPW	ZP_06422552	putative pyrogenic exotoxin B	family C10 unassigned peptidases
MER0247868	sp024548	C10.UPW	YP_004530844	putative pyrogenic exotoxin B	family C10 unassigned peptidases
MER0185173	sp020952	C10.UPW	ZP_04833269	putative thiol protease/hemagglutinin PrtT	family C10 unassigned peptidases
MER0204611	sp022660	C10.UPW	ZP_06406901	putative thiol protease/hemagglutinin PrtT	interpain A
MER0204613	sp022662	C10.UPW	ZP_06255888	putative thiol protease/hemagglutinin PrtT	interpain A
MER0204619	sp022668	C10.UPW	ZP_05858151	putative thiol protease/hemagglutinin PrtT	family C10 unassigned peptidases
MER0204650	sp022669	C10.UPW	ZP_06420313	putative thiol protease/hemagglutinin PrtT	interpain A
MER0291579	sp027392	C10.UPW	ZP_08845867	RHS repeat-associated core domain-containing protein	family C10 unassigned peptidases
MER0195562	sp025071	C10.UPW	ZP_08674100	streptopain	family C10 unassigned peptidases
MER0204620	sp022660	C10.UPW	ZP_06405089	streptopain	family C10 unassigned peptidases
MER0291550	sp024916	C10.UPW	ZP_08676492	streptopain	family C10 unassigned peptidases
MER0185169	sp020934	C10.UPW	ZP_04390474	thiol protease/hemagglutinin PrtT	family C10 unassigned peptidases
MER0291582	sp023437	C10.UPW	ZP_06982208	thiol protease/hemagglutinin PrtT	family C10 unassigned peptidases
MER0291524	sp024916	C10.UPW	ZP_08674976	trypsin like proteinase PrtT	interpain A
MER0291530	sp025071	C10.UPW	ZP_08671901	trypsin like proteinase PrtT	interpain A
MER0152306	sp000280	C11.001	BAG85141	clostripain	clostripain
MER0429498	sp027356	C11.001	ZP_10008893	Clostripain family	clostripain
MER0155374	sp016937	C11.001	ACM52135	Fibronectin type III domain protein	clostripain
MER0023098	sp002748	C11.001	ZP_00019030	hypothetical protein	clostripain
MER0613326	sp023518	C11.001	E1IC59	Peptidase S8 and S53 subtilisin kexin sedolisin	clostripain
MER0039929	sp000148	C11.004	A0A016AUI6	Clostripain family protein	fragipain
MER0611715	sp033640	C11.UNW	S0ESZ1	Clostripain family	family C11 non peptidase homologues
MER0503573	sp010773	C11.UNW	B8G973	Uncharacterized protein	family C11 non peptidase homologues
MER0016853	sp000283	C11.UPW	ZP_02863649	alpha-clostripain	family C11 unassigned peptidases
MER0246010	sp024429	C11.UPW	YP_004440945	cell wall/surface repeat protein	family C11 unassigned peptidases
MER0072906	sp003003	C11.UPW	A0A0A0IMJ1	Clostripain	family C11 unassigned peptidases
MER0185179	sp000280	C11.UPW	A0A0A2HHJ0	Clostripain	family C11 unassigned peptidases
MER0185181	sp000280	C11.UPW	YP_003034096	clostripain	family C11 unassigned peptidases
MER0187572	sp000280	C11.UPW	A0A0A0I0Q3	Clostripain	family C11 unassigned peptidases
MER0245093	sp000280	C11.UPW	A0A0A0HYR9	Clostripain	family C11 unassigned peptidases
MER0291587	sp003006	C11.UPW	EHN13632	clostripain	family C11 unassigned peptidases
MER0617327	sp003003	C11.UPW	A0A072Y843	Clostripain	family C11 unassigned peptidases
MER0628432	sp003003	C11.UPW	A0A072YSY1	Clostripain	family C11 unassigned peptidases
MER0635597	sp000280	C11.UPW	A0A072X8R7	Clostripain	family C11 unassigned peptidases
MER0637218	sp000280	C11.UPW	A0A0B4W7X3	Clostripain	family C11 unassigned peptidases
MER0637890	sp003003	C11.UPW	A0A0A0IAS8	Clostripain	family C11 unassigned peptidases
MER0639003	sp000280	C11.UPW	A0A073CTA7	Clostripain	family C11 unassigned peptidases
MER0242166	sp027127	C11.UPW	CBL16306	Clostripain family	family C11 unassigned peptidases
MER0291607	sp018852	C11.UPW	ZP_08159102	clostripain family	family C11 unassigned peptidases
MER0122812	sp012334	C11.UPW	R6J3A1	clostripain family protein	family C11 unassigned peptidases
MER0291604	sp027356	C11.UPW	ZP_10008857	Clostripain family protein	family C11 unassigned peptidases
MER0291626	sp025038	C11.UPW	R6LPH4	Clostripain family protein	family C11 unassigned peptidases
MER0429462	sp026671	C11.UPW	ZP_08502960	clostripain family protein	family C11 unassigned peptidases
MER0642934	sp000206	C11.UPW	A0A088TX76	Clostripain family protein	family C11 unassigned peptidases
MER0428964	sp023597	C11.UPW	CBK69177	Clostripain family.	family C11 unassigned peptidases
MER0429469	sp027111	C11.UPW	X5KK48	Clostripain-like protein	family C11 unassigned peptidases
MER0642091	sp000269	C11.UPW	R9CHC9	Clostripain-like protein	family C11 unassigned peptidases
MER0028004	sp002947	C11.UPW	Q8A866	clostripain-related protein	family C11 unassigned peptidases
MER0204164	sp022655	C11.UPW	ADF53398	clostripain-related protein	family C11 unassigned peptidases
MER0195725	sp029781	C11.UPW	ZP_21461120	cysteine peptidase C11 clostripain family	family C11 unassigned peptidases
MER0222071	sp023457	C11.UPW	YP_003832415	cysteine protease C11 family protein	family C11 unassigned peptidases
MER0499450	sp023597	C11.UPW	YP_007794439	hypothetical protein	family C11 unassigned peptidases
MER0499911	sp034464	C11.UPW	YP_008616898	hypothetical protein	family C11 unassigned peptidases
MER0507445	sp022660	C11.UPW	YP_008470605	hypothetical protein	family C11 unassigned peptidases
MER0352552	sp002996	C11.UPW	EKD72732	hypothetical protein ACD_45C00602G0005	family C11 unassigned peptidases
MER0352512	sp002996	C11.UPW	EKD68809	hypothetical protein ACD_47C00428G0001, partial	family C11 unassigned peptidases
MER0352551	sp029526	C11.UPW	ZP_10996597	hypothetical protein AJC13_06247	family C11 unassigned peptidases
MER0429427	sp016084	C11.UPW	ZP_02424162	hypothetical protein ALIPUT_00277	family C11 unassigned peptidases
MER0185186	sp020756	C11.UPW	ZP_03675980	hypothetical protein BACCELL_00303	family C11 unassigned peptidases
MER0231017	sp020756	C11.UPW	ZP_03677544	hypothetical protein BACCELL_01881	family C11 unassigned peptidases
MER0185185	sp019191	C11.UPW	ZP_03458954	hypothetical protein BACEGG_01738	family C11 unassigned peptidases
MER0181970	sp020765	C11.UPW	ACR31688	Hypothetical protein bglu_2g13260	family C11 unassigned peptidases
MER0144718	sp003006	C11.UPW	EDU36901	hypothetical protein CLOSPO_03070	family C11 unassigned peptidases
MER0429463	sp012334	C11.UPW	ZP_08594369	hypothetical protein HMPREF1017_01477	family C11 unassigned peptidases
MER0269821	sp024911	C11.UPW	ZP_08592441	hypothetical protein HMPREF1018_04459	family C11 unassigned peptidases
MER0342887	sp028181	C11.UPW	ZP_10377327	hypothetical protein HMPREF1068_03607	family C11 unassigned peptidases
MER0342884	sp023597	C11.UPW	EIY84673	hypothetical protein HMPREF1074_03843	family C11 unassigned peptidases
MER0352508	sp029370	C11.UPW	ZP_18883700	hypothetical protein HMPREF9447_04733	family C11 unassigned peptidases
MER0291633	sp027623	C11.UPW	ZP_09022889	hypothetical protein HMPREF9450_01804	family C11 unassigned peptidases
MER0291634	sp024937	C11.UPW	ZP_08475250	hypothetical protein HMPREF9455_03416	family C11 unassigned peptidases
MER0429485	sp020869	C11.UPW	ZP_09619210	hypothetical protein LDG_5553	family C11 unassigned peptidases
MER0094020	sp003213	C11.UPW	A0UAJ4	Hypothetical protein precursor	family C11 unassigned peptidases
MER0608231	sp018852	C11.UPW	A0A011UH94	Peptidase C11	family C11 unassigned peptidases
MER0094036	sp005130	C11.UPW	YP_001544586	peptidase C11 clostripain	family C11 unassigned peptidases
MER0101389	sp012353	C11.UPW	ABV33791	peptidase C11 clostripain	family C11 unassigned peptidases
MER0136297	sp015083	C11.UPW	ACL04193	peptidase C11 clostripain	family C11 unassigned peptidases
MER0223996	sp023039	C11.UPW	YP_003908799	peptidase C11 clostripain	family C11 unassigned peptidases
MER0234657	sp023785	C11.UPW	YP_004134183	peptidase C11 clostripain	family C11 unassigned peptidases
MER0235100	sp023788	C11.UPW	YP_004161495	peptidase C11 clostripain	family C11 unassigned peptidases
MER0240332	sp023901	C11.UPW	YP_004265653	peptidase C11 clostripain	family C11 unassigned peptidases
MER0242150	sp023533	C11.UPW	ZP_07324656	peptidase C11 clostripain	family C11 unassigned peptidases
MER0242151	sp023533	C11.UPW	ZP_07326858	peptidase C11 clostripain	family C11 unassigned peptidases
MER0242155	sp023533	C11.UPW	ZP_07326857	peptidase C11 clostripain	family C11 unassigned peptidases
MER0242156	sp023533	C11.UPW	ZP_07324657	peptidase C11 clostripain	family C11 unassigned peptidases
MER0242158	sp022942	C11.UPW	ZP_08194005	peptidase C11 clostripain	family C11 unassigned peptidases
MER0242159	sp018852	C11.UPW	YP_004090266	peptidase C11 clostripain	family C11 unassigned peptidases
MER0246265	sp024429	C11.UPW	YP_004439882	peptidase C11 clostripain	family C11 unassigned peptidases
MER0291593	sp021275	C11.UPW	YP_003240081	peptidase C11 clostripain	family C11 unassigned peptidases
MER0291602	sp027434	C11.UPW	ZP_10103881	peptidase C11 clostripain	family C11 unassigned peptidases
MER0291605	sp027305	C11.UPW	ZP_09103158	peptidase C11 clostripain	family C11 unassigned peptidases
MER0291618	sp024938	C11.UPW	R6FER6	Peptidase C11 clostripain	family C11 unassigned peptidases
MER0429460	sp003319	C11.UPW	ZP_08458068	peptidase C11 clostripain	family C11 unassigned peptidases
MER0071408	sp004011	C11.UPW	ABK17718	peptidase C11, clostripain	family C11 unassigned peptidases
MER0075535	sp003953	C11.UPW	ABL80795	peptidase C11, clostripain	family C11 unassigned peptidases
MER0088268	sp005297	C11.UPW	YP_001243891	peptidase C11, clostripain	family C11 unassigned peptidases
MER0182033	sp020765	C11.UPW	ACR32639	Peptidase C11, clostripain	family C11 unassigned peptidases
MER0079312	sp000280	C11.UPW	A0A0E1QG50	Putative clostripain	family C11 unassigned peptidases
MER0203591	sp022652	C11.UPW	ADE81602	putative lipoprotein	family C11 unassigned peptidases
MER0221348	sp020952	C11.UPW	YP_003814378	putative lipoprotein	family C11 unassigned peptidases
MER0429444	sp022671	C11.UPW	ZP_05735325	putative peptidase	family C11 unassigned peptidases
MER0039686	sp000117	C11.UPW	T5HPU3	Uncharacterized protein	family C11 unassigned peptidases
MER0095672	sp011407	C11.UPW	K6B4Z4	Uncharacterized protein	family C11 unassigned peptidases
MER0118601	sp012338	C11.UPW	R9HP05	Uncharacterized protein	family C11 unassigned peptidases
MER0164837	sp015938	C11.UPW	S3YPX2	Uncharacterized protein	family C11 unassigned peptidases
MER0185193	sp000148	C11.UPW	K1GP44	Uncharacterized protein	family C11 unassigned peptidases
MER0256631	sp000109	C11.UPW	A0A0D7XBX2	Uncharacterized protein	family C11 unassigned peptidases
MER0291622	sp027310	C11.UPW	R6JXC6	Uncharacterized protein	family C11 unassigned peptidases
MER0297773	sp019508	C11.UPW	K5Z305	Uncharacterized protein	family C11 unassigned peptidases
MER0622031	sp020949	C11.UPW	D7VSB1	Uncharacterized protein	family C11 unassigned peptidases
MER0623959	sp002996	C11.UPW	K2C6Q3	Uncharacterized protein	family C11 unassigned peptidases
MER0628412	sp000113	C11.UPW	R8UTM8	Uncharacterized protein	family C11 unassigned peptidases
MER0630119	sp012338	C11.UPW	I9J7B8	Uncharacterized protein	family C11 unassigned peptidases
MER0630472	sp000206	C11.UPW	A0A081VAN9	Uncharacterized protein	family C11 unassigned peptidases
MER0637287	sp022665	C11.UPW	D1Q0Q0	Uncharacterized protein	family C11 unassigned peptidases
MER0640068	sp020756	C11.UPW	E2NC71	Uncharacterized protein	family C11 unassigned peptidases
MER0127059	sp018415	C11.UPW	YP_003270186	unnamed protein product	family C11 unassigned peptidases
MER0178256	sp027195	C11.UPW	YP_005441015	unnamed protein product	family C11 unassigned peptidases
MER0291595	sp023472	C11.UPW	YP_006044609	unnamed protein product	family C11 unassigned peptidases
MER0626772	sp029568	C110.UNW	WP_015287481	hypothetical protein	family C110 non peptidase homologues
MER0627154	sp033691	C110.UNW	WP_041715614	hypothetical protein	family C110 non peptidase homologues
MER0627090	sp011437	C110.UNW	WP_028086575	transglutaminase	family C110 non peptidase homologues
MER0627152	sp019394	C110.UNW	EEF65802	transglutaminase-like protein	family C110 non peptidase homologues
MER0627191	sp002507	C110.UPW	EET59806	bacterial group 2 Ig-like protein	family C110 unassigned peptidases
MER0626510	sp027462	C110.UPW	WP_009171597	cell wall-binding protein	family C110 unassigned peptidases
MER0626614	sp000279	C110.UPW	WP_017208964	cell wall-binding protein	family C110 unassigned peptidases
MER0626777	sp029344	C110.UPW	WP_023973000	cell wall-binding protein	family C110 unassigned peptidases
MER0627088	sp000279	C110.UPW	WP_041897192	cell wall-binding protein	family C110 unassigned peptidases
MER0626618	sp023534	C110.UPW	WP_014062989	copper amine oxidase	family C110 unassigned peptidases
MER0626737	sp020877	C110.UPW	WP_013150429	copper amine oxidase	family C110 unassigned peptidases
MER0626739	sp028095	C110.UPW	WP_006570323	copper amine oxidase	family C110 unassigned peptidases
MER0626798	sp024553	C110.UPW	WP_013810020	copper amine oxidase	family C110 unassigned peptidases
MER0626799	sp024512	C110.UPW	WP_003542910	copper amine oxidase	family C110 unassigned peptidases
MER0627052	sp005255	C110.UPW	WP_003869606	copper amine oxidase	family C110 unassigned peptidases
MER0626427	sp024942	C110.UPW	WP_009267287	hypothetical protein	family C110 unassigned peptidases
MER0626483	sp027352	C110.UPW	WP_027880114	hypothetical protein	family C110 unassigned peptidases
MER0626561	sp027387	C110.UPW	WP_007137440	hypothetical protein	family C110 unassigned peptidases
MER0626632	sp015068	C110.UPW	WP_008270379	hypothetical protein	family C110 unassigned peptidases
MER0626697	sp019430	C110.UPW	WP_022250110	hypothetical protein	family C110 unassigned peptidases
MER0626746	sp011578	C110.UPW	WP_013022265	hypothetical protein	family C110 unassigned peptidases
MER0626774	sp027108	C110.UPW	WP_041628004	hypothetical protein	family C110 unassigned peptidases
MER0626796	sp024870	C110.UPW	WP_014035287	hypothetical protein	family C110 unassigned peptidases
MER0626884	sp016089	C110.UPW	WP_006875299	hypothetical protein	family C110 unassigned peptidases
MER0626908	sp019394	C110.UPW	WP_006057602	hypothetical protein	family C110 unassigned peptidases
MER0626929	sp000113	C110.UPW	WP_000038556	hypothetical protein	family C110 unassigned peptidases
MER0627017	sp023351	C110.UPW	WP_013237564	hypothetical protein	family C110 unassigned peptidases
MER0627075	sp012357	C110.UPW	WP_005358710	hypothetical protein	family C110 unassigned peptidases
MER0627094	sp000113	C110.UPW	WP_000288207	hypothetical protein	family C110 unassigned peptidases
MER0627243	sp021010	C110.UPW	WP_023353804	hypothetical protein	family C110 unassigned peptidases
MER0626980	sp003021	C110.UPW	EDN01085	hypothetical protein BACCAP_01026	family C110 unassigned peptidases
MER0627228	sp023085	C110.UPW	EFF68356	hypothetical protein BUTYVIB_01627	family C110 unassigned peptidases
MER0627035	sp030784	C110.UPW	AGX44468	hypothetical protein CLSA_c35070	family C110 unassigned peptidases
MER0626714	sp024514	C110.UPW	EFV20417	hypothetical protein HMPREF1026_00379	family C110 unassigned peptidases
MER0627168	sp000281	C110.UPW	ENZ31388	hypothetical protein HMPREF1084_02907	family C110 unassigned peptidases
MER0627108	sp023072	C110.UPW	EFB89507	hypothetical protein HMPREF7215_0788	family C110 unassigned peptidases
MER0627065	sp003185	C110.UPW	WP_034490042	hypothetical protein, partial	family C110 unassigned peptidases
MER0627132	sp029351	C110.UPW	WP_044925320	hypothetical protein, partial	family C110 unassigned peptidases
MER0626488	sp020866	C110.UPW	ADL50966	Ig domain protein group 2 domain protein	family C110 unassigned peptidases
MER0626596	sp020866	C110.UPW	ADL50967	Ig domain protein group 2 domain protein	family C110 unassigned peptidases
MER0626723	sp027304	C110.UPW	AFM43195	Ig-like domain-containing surface protein	family C110 unassigned peptidases
MER0428007	sp027340	C110.UPW	WP_015333216	Kyphoscoliosis peptidase	family C110 unassigned peptidases
MER0626621	sp024870	C110.UPW	WP_015587568	lipoprotein	family C110 unassigned peptidases
MER0627276	sp003290	C110.UPW	WP_012678936	lipoprotein	family C110 unassigned peptidases
MER0627055	sp000113	C110.UPW	WP_016114552	murein endopeptidase	family C110 unassigned peptidases
MER0626926	sp000113	C110.UPW	WP_001996073	peptidase	family C110 unassigned peptidases
MER0626943	sp019448	C110.UPW	WP_012093996	peptidase	family C110 unassigned peptidases
MER0627054	sp003074	C110.UPW	WP_003197037	peptidase	family C110 unassigned peptidases
MER0627157	sp000129	C110.UPW	WP_044790736	peptidase	family C110 unassigned peptidases
MER0626968	sp020807	C110.UPW	WP_022292687	peptidoglycan endo-beta-N-acetylglucosaminidase	family C110 unassigned peptidases
MER0627273	sp005204	C110.UPW	BAI63332	peptidoglycan endo-beta-N-acetylglucosaminidase	family C110 unassigned peptidases
MER0627067	sp019448	C110.UPW	WP_011983595	S-layer domain-containing protein	family C110 unassigned peptidases
MER0626928	sp003074	C110.UPW	WP_044440953	S-layer protein	family C110 unassigned peptidases
MER0627031	sp000113	C110.UPW	WP_016716682	S-layer protein	family C110 unassigned peptidases
MER0627080	sp000129	C110.UPW	WP_000288195	S-layer protein	family C110 unassigned peptidases
MER0627087	sp000113	C110.UPW	WP_016078005	S-layer protein	family C110 unassigned peptidases
MER0627237	sp003074	C110.UPW	WP_042982298	S-layer protein	family C110 unassigned peptidases
MER0627246	sp005457	C110.UPW	WP_033730912	S-layer protein	family C110 unassigned peptidases
MER0627045	sp000113	C110.UPW	EEK68966	S-layer protein / Peptidoglycan endo-beta-N-acetylglucosaminidase	family C110 unassigned peptidases
MER0627099	sp000129	C110.UPW	EEM85104	S-layer protein / Peptidoglycan endo-beta-N-acetylglucosaminidase	family C110 unassigned peptidases
MER0627103	sp000113	C110.UPW	EEK52110	S-layer protein / Peptidoglycan endo-beta-N-acetylglucosaminidase	family C110 unassigned peptidases
MER0627104	sp000129	C110.UPW	EAO55710	S-layer protein / Peptidoglycan endo-beta-N-acetylglucosaminidase	family C110 unassigned peptidases
MER0627115	sp000113	C110.UPW	EEK85522	S-layer protein / Peptidoglycan endo-beta-N-acetylglucosaminidase	family C110 unassigned peptidases
MER0627119	sp000129	C110.UPW	EEM23932	S-layer protein / Peptidoglycan endo-beta-N-acetylglucosaminidase	family C110 unassigned peptidases
MER0627262	sp003074	C110.UPW	WP_003187723	S-layer protein / Peptidoglycan endo-beta-N-acetylglucosaminidase	family C110 unassigned peptidases
MER0627207	sp000988	C110.UPW	WP_032460636	S-layer protein, partial	family C110 unassigned peptidases
MER0626882	sp003002	C110.UPW	ABK62042	S-layer-like domain, putative	family C110 unassigned peptidases
MER0627129	sp002996	C110.UPW	AHF23891	surface antigen BspA-like protein	family C110 unassigned peptidases
MER0626370	sp002128	C110.UPW	WP_044688657	transglutaminase	family C110 unassigned peptidases
MER0626390	sp002128	C110.UPW	WP_044774784	transglutaminase	family C110 unassigned peptidases
MER0626495	sp028127	C110.UPW	WP_008462575	transglutaminase	family C110 unassigned peptidases
MER0626503	sp028131	C110.UPW	WP_007811765	transglutaminase	family C110 unassigned peptidases
MER0626604	sp030784	C110.UPW	WP_022747620	transglutaminase	family C110 unassigned peptidases
MER0626626	sp000122	C110.UPW	WP_023990307	transglutaminase	family C110 unassigned peptidases
MER0626694	sp000122	C110.UPW	WP_039270266	transglutaminase	family C110 unassigned peptidases
MER0626699	sp027253	C110.UPW	WP_014279429	transglutaminase	family C110 unassigned peptidases
MER0626708	sp027253	C110.UPW	WP_043922287	transglutaminase	family C110 unassigned peptidases
MER0626758	sp023168	C110.UPW	WP_013175436	transglutaminase	family C110 unassigned peptidases
MER0626762	sp028093	C110.UPW	WP_010344663	transglutaminase	family C110 unassigned peptidases
MER0626769	sp027253	C110.UPW	WP_044644486	transglutaminase	family C110 unassigned peptidases
MER0626819	sp024493	C110.UPW	WP_009594081	transglutaminase	family C110 unassigned peptidases
MER0626841	sp027297	C110.UPW	WP_015255990	transglutaminase	family C110 unassigned peptidases
MER0626871	sp027299	C110.UPW	WP_007131697	transglutaminase	family C110 unassigned peptidases
MER0626985	sp020834	C110.UPW	WP_007063614	transglutaminase	family C110 unassigned peptidases
MER0627012	sp003003	C110.UPW	WP_039249919	transglutaminase	family C110 unassigned peptidases
MER0627066	sp000279	C110.UPW	WP_017211795	transglutaminase	family C110 unassigned peptidases
MER0627187	sp029344	C110.UPW	WP_023973993	transglutaminase	family C110 unassigned peptidases
MER0627235	sp018607	C110.UPW	WP_015482183	transglutaminase	family C110 unassigned peptidases
MER0627239	sp000279	C110.UPW	WP_026885439	transglutaminase	family C110 unassigned peptidases
MER0627288	sp018852	C110.UPW	WP_013499675	transglutaminase	family C110 unassigned peptidases
MER0627296	sp000280	C110.UPW	WP_012431074	transglutaminase	family C110 unassigned peptidases
MER0627297	sp023563	C110.UPW	WP_013659100	transglutaminase	family C110 unassigned peptidases
MER0626489	sp018403	C110.UPW	ACU59570	transglutaminase domain protein	family C110 unassigned peptidases
MER0626879	sp022954	C110.UPW	WP_009986104	transglutaminase domain protein	family C110 unassigned peptidases
MER0627038	sp023531	C110.UPW	EFM11953	transglutaminase domain protein	family C110 unassigned peptidases
MER0570196	sp024070	C110.UPW	WP_013685560	transglutaminase domain-containing protein	family C110 unassigned peptidases
MER0588303	sp027580	C110.UPW	WP_002706759	transglutaminase domain-containing protein	family C110 unassigned peptidases
MER0626541	sp029133	C110.UPW	WP_015392564	transglutaminase domain-containing protein	family C110 unassigned peptidases
MER0626586	sp023525	C110.UPW	WP_013445732	transglutaminase domain-containing protein	family C110 unassigned peptidases
MER0626748	sp030784	C110.UPW	WP_022747628	transglutaminase domain-containing protein	family C110 unassigned peptidases
MER0626838	sp027580	C110.UPW	WP_002706042	transglutaminase domain-containing protein	family C110 unassigned peptidases
MER0626852	sp024545	C110.UPW	WP_013766624	transglutaminase domain-containing protein	family C110 unassigned peptidases
MER0626905	sp029331	C110.UPW	AFV12334	transglutaminase domain-containing protein	family C110 unassigned peptidases
MER0627063	sp064606	C110.UPW	WP_023162950	transglutaminase domain-containing protein	family C110 unassigned peptidases
MER0627069	sp002899	C110.UPW	ABB15759	transglutaminase family protein	family C110 unassigned peptidases
MER0627220	sp004344	C110.UPW	WP_022032063	transglutaminase family protein	family C110 unassigned peptidases
MER0626580	sp027298	C110.UPW	WP_010498468	transglutaminase-like enzyme cysteine protease	family C110 unassigned peptidases
MER0626981	sp000113	C110.UPW	AIE79172	transglutaminase-like predicted protease	family C110 unassigned peptidases
MER0627180	sp023533	C110.UPW	WP_010250600	transglutaminase-like protease	family C110 unassigned peptidases
MER0626457	sp002128	C110.UPW	ADE31418	Transglutaminase-like protein	family C110 unassigned peptidases
MER0626766	sp027161	C110.UPW	WP_008086963	transglutaminase-like protein	family C110 unassigned peptidases
MER0627172	sp000987	C110.UPW	CKF52982	Transglutaminase-like protein	family C110 unassigned peptidases
MER0627214	sp027162	C110.UPW	WP_006739138	transglutaminase-like protein	family C110 unassigned peptidases
MER0626667	sp016099	C110.UPW	WP_022270679	transglutaminase-like superfamily	family C110 unassigned peptidases
MER0626966	sp020807	C110.UPW	CBK91105	Transglutaminase-like superfamily	family C110 unassigned peptidases
MER0627219	sp003074	C110.UPW	AIK39702	transglutaminase-like superfamily protein	family C110 unassigned peptidases
MER0626615	sp023416	C110.UPW	CBK79352	Transglutaminase-like superfamily./Putative cell wall binding repeat	family C110 unassigned peptidases
MER0626974	sp029133	C110.UPW	WP_015394235	transglutaminase-like superfamily/putative cell wall binding repeat protein	family C110 unassigned peptidases
MER1020437	sp002128	C113.001	WP_012027720	ribonuclease	IgdE peptidase
MER0746542	sp000981	C113.UPW	CCW42936	FIG01119219: hypothetical protein	family C113 homologues, unassigned
MER0428027	sp002128	C113.UPW	WP_024412941	hypothetical protein	family C113 homologues, unassigned
MER0581820	sp002128	C113.UPW	WP_024416363	hypothetical protein	family C113 homologues, unassigned
MER0583124	sp002128	C113.UPW	WP_024414493	hypothetical protein	family C113 homologues, unassigned
MER0586214	sp002128	C113.UPW	WP_044754153	hypothetical protein	family C113 homologues, unassigned
MER0595825	sp002128	C113.UPW	WP_024381951	hypothetical protein	family C113 homologues, unassigned
MER0599410	sp002128	C113.UPW	WP_044684005	hypothetical protein	family C113 homologues, unassigned
MER0605199	sp002128	C113.UPW	WP_044666819	hypothetical protein	family C113 homologues, unassigned
MER0627163	sp002128	C113.UPW	WP_044671755	hypothetical protein	family C113 homologues, unassigned
MER0628981	sp002128	C113.UPW	WP_044672596	hypothetical protein	family C113 homologues, unassigned
MER0633911	sp002128	C113.UPW	WP_044772576	hypothetical protein	family C113 homologues, unassigned
MER0646611	sp002128	C113.UPW	WP_024383620	hypothetical protein	family C113 homologues, unassigned
MER0646690	sp002128	C113.UPW	WP_024388957	hypothetical protein	family C113 homologues, unassigned
MER0651084	sp002128	C113.UPW	WP_044475488	hypothetical protein	family C113 homologues, unassigned
MER0653470	sp002128	C113.UPW	WP_024386700	hypothetical protein	family C113 homologues, unassigned
MER0660737	sp025066	C113.UPW	WP_003085269	hypothetical protein	family C113 homologues, unassigned
MER0662787	sp023693	C113.UPW	WP_007895676	hypothetical protein	family C113 homologues, unassigned
MER0663635	sp002128	C113.UPW	WP_044678077	hypothetical protein	family C113 homologues, unassigned
MER0695391	sp002128	C113.UPW	WP_024386254	hypothetical protein	family C113 homologues, unassigned
MER0695938	sp002128	C113.UPW	WP_044676225	hypothetical protein	family C113 homologues, unassigned
MER0696226	sp002128	C113.UPW	WP_024399592	hypothetical protein	family C113 homologues, unassigned
MER0697847	sp002128	C113.UPW	WP_053867045	hypothetical protein	family C113 homologues, unassigned
MER0698667	sp002128	C113.UPW	WP_029751765	hypothetical protein	family C113 homologues, unassigned
MER0699015	sp002128	C113.UPW	WP_044691589	hypothetical protein	family C113 homologues, unassigned
MER0702998	sp002128	C113.UPW	WP_044770518	hypothetical protein	family C113 homologues, unassigned
MER0820033	sp021010	C113.UPW	WP_035039024	hypothetical protein	family C113 homologues, unassigned
MER0756637	sp000981	C113.UPW	EPT99261	hypothetical protein SAG0109_04160	family C113 homologues, unassigned
MER0728475	sp000981	C113.UPW	EPU40877	hypothetical protein SAG0170_01955	family C113 homologues, unassigned
MER0637202	sp002128	C113.UPW	WP_024405940	hypothetical protein, partial	family C113 homologues, unassigned
MER0637632	sp002128	C113.UPW	WP_024383851	hypothetical protein, partial	family C113 homologues, unassigned
MER0695402	sp002128	C113.UPW	WP_024412227	hypothetical protein, partial	family C113 homologues, unassigned
MER0821242	sp000280	C113.UPW	AIW54599	putative transglutaminase family protein	family C113 homologues, unassigned
MER0363171	sp002128	C113.UPW	WP_014639000	ribonuclease	family C113 homologues, unassigned
MER0427915	sp002128	C113.UPW	WP_024382860	ribonuclease	family C113 homologues, unassigned
MER0428067	sp002128	C113.UPW	WP_044671803	ribonuclease	family C113 homologues, unassigned
MER0523091	sp002128	C113.UPW	WP_044683049	ribonuclease	family C113 homologues, unassigned
MER0585892	sp002128	C113.UPW	WP_024406212	ribonuclease	family C113 homologues, unassigned
MER0598940	sp002128	C113.UPW	WP_044762560	ribonuclease	family C113 homologues, unassigned
MER0758433	sp028288	C113.UPW	WP_003044374	ribonuclease	family C113 homologues, unassigned
MER0761100	sp005204	C113.UPW	WP_046176958	ribonuclease	family C113 homologues, unassigned
MER0765473	sp005204	C113.UPW	WP_046166029	ribonuclease	family C113 homologues, unassigned
MER0765644	sp005204	C113.UPW	WP_003051871	ribonuclease	family C113 homologues, unassigned
MER0228642	sp002128	C113.UPW	AER15932	ribonucleases G and E	family C113 homologues, unassigned
MER0705843	sp003290	C113.UPW	KIS19971	ribonucleases G and E	family C113 homologues, unassigned
MER0717390	sp000981	C113.UPW	CFW66620	ribonucleases G and E	family C113 homologues, unassigned
MER0758163	sp000981	C113.UPW	CFQ52811	ribonucleases G and E	family C113 homologues, unassigned
MER0636908	sp002128	C113.UPW	WP_024393919	transglutaminase	family C113 homologues, unassigned
MER0640357	sp002128	C113.UPW	WP_044752120	transglutaminase	family C113 homologues, unassigned
MER0655717	sp002128	C113.UPW	WP_044771392	transglutaminase	family C113 homologues, unassigned
MER0655742	sp002128	C113.UPW	WP_014736321	transglutaminase	family C113 homologues, unassigned
MER0663947	sp002128	C113.UPW	WP_044763471	transglutaminase	family C113 homologues, unassigned
MER0665047	sp002128	C113.UPW	WP_044757585	transglutaminase	family C113 homologues, unassigned
MER0676493	sp002128	C113.UPW	WP_024395399	transglutaminase	family C113 homologues, unassigned
MER0683092	sp002128	C113.UPW	WP_044686649	transglutaminase	family C113 homologues, unassigned
MER0696522	sp002128	C113.UPW	WP_044769938	transglutaminase	family C113 homologues, unassigned
MER0819590	sp000281	C113.UPW	KHD14431	transglutaminase	family C113 homologues, unassigned
MER0758552	sp027161	C113.UPW	WP_008089535	transglutaminase-like protein	family C113 homologues, unassigned
MER0820003	sp021010	C113.UPW	ESL04087	transglutaminase-like protein	family C113 homologues, unassigned
MER0071147	sp000836	C13.UPW	ABA76720	conserved hypothetical protein	family C13 unassigned peptidases
MER0096252	sp002015	C13.UPW	ACD59276	conserved hypothetical protein	family C13 unassigned peptidases
MER0123861	sp018388	C13.UPW	ACG77278	conserved hypothetical protein	family C13 unassigned peptidases
MER0292310	sp027356	C13.UPW	ZP_10009954	Glycosylphosphatidylinositol transamidase , subunit GPI8	family C13 unassigned peptidases
MER0182352	sp020795	C13.UPW	BAH78072	hypothetical protein	family C13 unassigned peptidases
MER0197227	sp011101	C13.UPW	CBA15826	hypothetical protein	family C13 unassigned peptidases
MER0501072	sp002111	C13.UPW	YP_008589890	hypothetical protein	family C13 unassigned peptidases
MER0507671	sp001944	C13.UPW	YP_007650545	hypothetical protein	family C13 unassigned peptidases
MER0185328	sp020756	C13.UPW	ZP_03677530	hypothetical protein BACCELL_01867	family C13 unassigned peptidases
MER0255513	sp004025	C13.UPW	YP_004753222	hypothetical protein CFU_2572	family C13 unassigned peptidases
MER0344351	sp020756	C13.UPW	EIY32185	hypothetical protein HMPREF1062_02119	family C13 unassigned peptidases
MER0344352	sp012338	C13.UPW	EIY81681	hypothetical protein HMPREF1073_00919	family C13 unassigned peptidases
MER0358490	sp019508	C13.UPW	ZP_17320680	hypothetical protein HMPREF1077_02110	family C13 unassigned peptidases
MER0429464	sp024916	C13.UPW	ZP_08676997	hypothetical protein HMPREF9144_2809, partial	family C13 unassigned peptidases
MER0013642	sp000835	C13.UPW	EGM20148	hypothetical protein PA13_10269	family C13 unassigned peptidases
MER0108264	sp011447	C13.UPW	EDM75598	Legumain	family C13 unassigned peptidases
MER0270395	sp024938	C13.UPW	YP_004254713	Legumain	family C13 unassigned peptidases
MER0647740	sp020952	C13.UPW	A0A096AJV5	Legumain	family C13 unassigned peptidases
MER0097090	sp003272	C13.UPW	YP_001189291	MORN repeat-containing protein	family C13 unassigned peptidases
MER0429032	sp022671	C13.UPW	EEX70531	peptidase C13 family protein	family C13 unassigned peptidases
MER0152819	sp015180	C13.UPW	ACL62853	Peptidase C13, legumain asparaginyl peptidase	family C13 unassigned peptidases
MER0204342	sp022656	C13.UPW	ADG09808	Peptidase C13, legumain asparaginyl peptidase	family C13 unassigned peptidases
MER0222005	sp022843	C13.UPW	YP_003819083	Peptidase C13, legumain asparaginyl peptidase	family C13 unassigned peptidases
MER0001848	sp000246	C13.UPW	ACL95654	peptidase, C13 family	family C13 unassigned peptidases
MER0095996	sp000596	C13.UPW	YP_760134	putative lipoprotein	family C13 unassigned peptidases
MER0152098	sp015083	C13.UPW	ACL03826	two component regulator propeller domain protein	family C13 unassigned peptidases
MER0611986	sp020756	C13.UPW	R6LH28	Uncharacterized protein	family C13 unassigned peptidases
MER0648835	sp002222	C13.UPW	A0A0D9NDX5	Uncharacterized protein	family C13 unassigned peptidases
MER0650677	sp025071	C13.UPW	V8C9I9	Uncharacterized protein	family C13 unassigned peptidases
MER0691680	sp029372	C13.UPW	S0GRX1	Uncharacterized protein	family C13 unassigned peptidases
MER0284448	sp000147	C13.UPW	YP_005015346	unnamed protein product	family C13 unassigned peptidases
MER0027486	sp000188	C14.026	NP_770251	bll3611	subfamily C14B unassigned peptidases
MER0027483	sp000188	C14.026	NP_767584	blr0944	subfamily C14B unassigned peptidases
MER0019212	sp000188	C14.026	Q89IK1	Blr5633 protein	subfamily C14B unassigned peptidases
MER0048746	sp003329	C14.026	AAZ24535	ICE-like protease p20 domain protein	subfamily C14B unassigned peptidases
MER0019353	sp001993	C14.026	Q98JS7	mlr1804 protein	subfamily C14B unassigned peptidases
MER0073230	sp002760	C14.026	ABJ05532	peptidase C14, caspase catalytic subunit p20	subfamily C14B unassigned peptidases
MER0240835	sp023904	C14.A07	YP_004247931	hypothetical protein SpiBuddy_1913	subfamily C14B unassigned peptidases
MER0097194	sp010743	C14.A07	YP_001529886	peptidase C14 caspase catalytic subunit p20	subfamily C14B unassigned peptidases
MER0249695	sp024545	C14.A07	YP_004446433	peptidase C14 caspase catalytic subunit p20	subfamily C14B unassigned peptidases
MER0146586	sp027206	C14.A07	YP_005320808	unnamed protein product	subfamily C14B unassigned peptidases
MER0283740	sp027096	C14.A07	YP_005063807	unnamed protein product	subfamily C14B unassigned peptidases
MER0283741	sp027096	C14.A07	YP_005063808	unnamed protein product	subfamily C14B unassigned peptidases
MER0221058	sp018588	C14.UNB	YP_003796597	hypothetical protein NIDE0907	subfamily C14B non peptidase homologues
MER0241312	sp018588	C14.UNB	YP_003797304	hypothetical protein NIDE1644	subfamily C14B non peptidase homologues
MER0221125	sp018588	C14.UNB	YP_003798961	hypothetical protein NIDE3349	subfamily C14B non peptidase homologues
MER0063893	sp002760	C14.UNB	ABD05608	peptidase C14, caspase catalytic subunit p20	subfamily C14B non peptidase homologues
MER0073222	sp002760	C14.UNB	ABJ04864	peptidase C14, caspase catalytic subunit p20	subfamily C14B non peptidase homologues
MER0136363	sp016911	C14.UNB	ACK50839	protein of unknown function DUF323	subfamily C14B non peptidase homologues
MER0061154	sp004298	C14.UNB	YP_001236738	putative Peptidase, Caspase-like domain and TPR repeats	subfamily C14B non peptidase homologues
MER0067035	sp027194	C14.UNB	YP_005447821	unnamed protein product	subfamily C14B non peptidase homologues
MER0069591	sp027194	C14.UNB	YP_005449552	unnamed protein product	subfamily C14B non peptidase homologues
MER0072044	sp027194	C14.UNB	YP_005450639	unnamed protein product	subfamily C14B non peptidase homologues
MER0018681	sp000188	C14.UNW	Q89XG2	Blr0352 protein	family C14 non peptidase homologues
MER0046002	sp002760	C14.UNW	CAE30117	Caspase-1, p20:TPR repeat	family C14 non peptidase homologues
MER0031247	sp001993	C14.UNW	Q985X8	Hypothetical protein mlr7482	family C14 non peptidase homologues
MER0054933	sp004898	C14.UNW	ABA06279	Peptidase C14	family C14 non peptidase homologues
MER0059970	sp011422	C14.UNW	ACA15459	peptidase C14 caspase catalytic subunit p20	family C14 non peptidase homologues
MER0067099	sp002760	C14.UNW	ACE99418	peptidase C14 caspase catalytic subunit p20	family C14 non peptidase homologues
MER0100991	sp016792	C14.UNW	ACB93795	peptidase C14 caspase catalytic subunit p20	family C14 non peptidase homologues
MER0137781	sp016911	C14.UNW	ACK50297	peptidase C14 caspase catalytic subunit p20	family C14 non peptidase homologues
MER0153079	sp015180	C14.UNW	ACL60346	peptidase C14 caspase catalytic subunit p20	family C14 non peptidase homologues
MER0153602	sp015180	C14.UNW	ACL56335	peptidase C14 caspase catalytic subunit p20	family C14 non peptidase homologues
MER0231141	sp002760	C14.UNW	YP_004111128	peptidase C14 caspase catalytic subunit p20	family C14 non peptidase homologues
MER0252543	sp021127	C14.UNW	YP_004614123	peptidase C14 caspase catalytic subunit p20	family C14 non peptidase homologues
MER0061347	sp002760	C14.UNW	ABE38247	peptidase C14, caspase catalytic subunit p20	family C14 non peptidase homologues
MER0067717	sp002760	C14.UNW	YP_533043	peptidase C14, caspase catalytic subunit p20	family C14 non peptidase homologues
MER0067753	sp002760	C14.UNW	YP_534527	peptidase C14, caspase catalytic subunit p20	family C14 non peptidase homologues
MER0072226	sp003925	C14.UNW	ABE61813	peptidase C14, caspase catalytic subunit p20	family C14 non peptidase homologues
MER0073243	sp002760	C14.UNW	ABJ06217	peptidase C14, caspase catalytic subunit p20	family C14 non peptidase homologues
MER0134186	sp004932	C14.UNW	ACI93075	peptidase C14, caspase catalytic subunit p20	family C14 non peptidase homologues
MER0121076	sp011422	C14.UNW	ACA19359	protein of unknown function DUF323	family C14 non peptidase homologues
MER0061155	sp004298	C14.UNW	YP_001236734	putative Peptidase	family C14 non peptidase homologues
MER0040236	sp003535	C14.UNW	YP_064948-1	related to paracaspase	family C14 non peptidase homologues
MER0239838	sp001905	C14.UPB	ZP_01465308	ActD	subfamily C14B unassigned peptidases
MER0252056	sp024584	C14.UPB	YP_004669438	ActD-like protein	subfamily C14B unassigned peptidases
MER0019017	sp000188	C14.UPB	Q89EN1	Bll7042 protein	subfamily C14B unassigned peptidases
MER0026724	sp000188	C14.UPB	BAC51166	blr5901	subfamily C14B unassigned peptidases
MER0027487	sp000188	C14.UPB	NP_772587	blr5947	subfamily C14B unassigned peptidases
MER0026978	sp000188	C14.UPB	Q89FZ4	blr6554	subfamily C14B unassigned peptidases
MER0241349	sp018538	C14.UPB	ZP_05072557	caspase domain protein	subfamily C14B unassigned peptidases
MER0241290	sp004764	C14.UPB	YP_422198	caspase domain-containing protein	subfamily C14B unassigned peptidases
MER0019358	sp001804	C14.UPB	ZP_00684015	Caspase-1, p20:Polysaccharide deacetylase	subfamily C14B unassigned peptidases
MER0061661	sp005468	C14.UPB	ABE35480	conserved hypothetical protein	subfamily C14B unassigned peptidases
MER0071079	sp000604	C14.UPB	ABJ77313	Conserved hypothetical protein	subfamily C14B unassigned peptidases
MER0241274	sp010745	C14.UPB	EDZ38863	Conserved hypothetical protein	subfamily C14B unassigned peptidases
MER0241302	sp010677	C14.UPB	ZP_01694569	conserved hypothetical protein	subfamily C14B unassigned peptidases
MER0060931	sp011236	C14.UPB	YP_001207146	conserved hypothetical protein with a TPR motif and a caspase domain; putative exported protein	subfamily C14B unassigned peptidases
MER0060936	sp011236	C14.UPB	YP_001206911	conserved hypothetical protein; putative signal peptide; putative caspase domain	subfamily C14B unassigned peptidases
MER0026659	sp002754	C14.UPB	ZP_00043080	hypothetical protein	subfamily C14B unassigned peptidases
MER0112718	sp018436	C14.UPB	GEBA2500531528	hypothetical protein	subfamily C14B unassigned peptidases
MER0114787	sp018415	C14.UPB	GEBA2500505312	hypothetical protein	subfamily C14B unassigned peptidases
MER0127710	sp018406	C14.UPB	GEBA2500632004	hypothetical protein	subfamily C14B unassigned peptidases
MER0128827	sp018436	C14.UPB	GEBA2500529673	hypothetical protein	subfamily C14B unassigned peptidases
MER0133212	sp018411	C14.UPB	GEBA2500512110	hypothetical protein	subfamily C14B unassigned peptidases
MER0500353	sp032801	C14.UPB	YP_008048082	hypothetical protein	subfamily C14B unassigned peptidases
MER0502287	sp903250	C14.UPB	YP_008856479	hypothetical protein	subfamily C14B unassigned peptidases
MER0503445	sp903164	C14.UPB	YP_008680476	hypothetical protein	subfamily C14B unassigned peptidases
MER0503447	sp903164	C14.UPB	YP_008680491	hypothetical protein	subfamily C14B unassigned peptidases
MER0503825	sp886420	C14.UPB	YP_008867076	hypothetical protein	subfamily C14B unassigned peptidases
MER0504521	sp002804	C14.UPB	YP_008939823	hypothetical protein	subfamily C14B unassigned peptidases
MER0504935	sp089236	C14.UPB	YP_008973993	hypothetical protein	subfamily C14B unassigned peptidases
MER0507716	sp001944	C14.UPB	YP_007652699	hypothetical protein	subfamily C14B unassigned peptidases
MER0508217	sp018386	C14.UPB	YP_008514403	hypothetical protein	subfamily C14B unassigned peptidases
MER0510973	sp000865	C14.UPB	YP_008367416	hypothetical protein	subfamily C14B unassigned peptidases
MER0393592	sp024057	C14.UPB	ZP_01445071	hypothetical protein 1100011001316_R2601_07718	subfamily C14B unassigned peptidases
MER0241275	sp020756	C14.UPB	ZP_03676726	hypothetical protein BACCELL_01053	subfamily C14B unassigned peptidases
MER0241284	sp018537	C14.UPB	ZP_03209390	hypothetical protein BACPLE_03064	subfamily C14B unassigned peptidases
MER0241285	sp015181	C14.UPB	ZP_02190952	hypothetical protein BAL199_19773	subfamily C14B unassigned peptidases
MER0429395	sp004298	C14.UPB	YP_001239951	hypothetical protein BBta_3976	subfamily C14B unassigned peptidases
MER0429396	sp004298	C14.UPB	YP_001240302	hypothetical protein BBta_4352	subfamily C14B unassigned peptidases
MER0238185	sp022943	C14.UPB	YP_004231045	hypothetical protein BC1001_4596	subfamily C14B unassigned peptidases
MER0224037	sp023039	C14.UPB	YP_003910115	hypothetical protein BC1003_4901	subfamily C14B unassigned peptidases
MER0039930	sp000148	C14.UPB	ZP_05283200	hypothetical protein Bfra3_18177	subfamily C14B unassigned peptidases
MER0429408	sp000188	C14.UPB	YP_005607747	hypothetical protein BJ6T_28810	subfamily C14B unassigned peptidases
MER0429411	sp000188	C14.UPB	YP_005608673	hypothetical protein BJ6T_38110	subfamily C14B unassigned peptidases
MER0429413	sp000188	C14.UPB	YP_005609901	hypothetical protein BJ6T_50510	subfamily C14B unassigned peptidases
MER0429415	sp000188	C14.UPB	YP_005612257	hypothetical protein BJ6T_74220	subfamily C14B unassigned peptidases
MER0429501	sp027450	C14.UPB	ZP_10079934	hypothetical protein Bra1253DRAFT_00584	subfamily C14B unassigned peptidases
MER0429502	sp027450	C14.UPB	ZP_10080317	hypothetical protein Bra1253DRAFT_00975	subfamily C14B unassigned peptidases
MER0429503	sp027450	C14.UPB	ZP_10083930	hypothetical protein Bra1253DRAFT_04726	subfamily C14B unassigned peptidases
MER0393705	sp027450	C14.UPB	ZP_10085627	hypothetical protein Bra1253DRAFT_06529	subfamily C14B unassigned peptidases
MER0429487	sp000388	C14.UPB	ZP_09646775	hypothetical protein Bra471DRAFT_02271	subfamily C14B unassigned peptidases
MER0429488	sp000388	C14.UPB	ZP_09648353	hypothetical protein Bra471DRAFT_03878	subfamily C14B unassigned peptidases
MER0429489	sp000388	C14.UPB	ZP_09648746	hypothetical protein Bra471DRAFT_04284	subfamily C14B unassigned peptidases
MER0429490	sp000388	C14.UPB	ZP_09650289	hypothetical protein Bra471DRAFT_05856	subfamily C14B unassigned peptidases
MER0429491	sp000388	C14.UPB	ZP_09651730	hypothetical protein Bra471DRAFT_07343	subfamily C14B unassigned peptidases
MER0429392	sp011236	C14.UPB	YP_001205557	hypothetical protein BRADO3551	subfamily C14B unassigned peptidases
MER0429499	sp027168	C14.UPB	ZP_10024268	hypothetical protein BURK_11089	subfamily C14B unassigned peptidases
MER0241340	sp003304	C14.UPB	YP_182112	hypothetical protein DET1403	subfamily C14B unassigned peptidases
MER0193248	sp012342	C14.UPB	ACZ62297	hypothetical protein DhcVS_1185	subfamily C14B unassigned peptidases
MER0251728	sp024584	C14.UPB	YP_004665594	hypothetical protein LILAB_13045	subfamily C14B unassigned peptidases
MER0429417	sp005442	C14.UPB	ZP_01056752	hypothetical protein MED193_01580	subfamily C14B unassigned peptidases
MER0068528	sp000696	C14.UPB	YP_634800	hypothetical protein MXAN_6683	subfamily C14B unassigned peptidases
MER0221082	sp018588	C14.UPB	YP_003797590	hypothetical protein NIDE1939	subfamily C14B unassigned peptidases
MER0162579	sp005432	C14.UPB	ZP_00999556	hypothetical protein OB2597_13338	subfamily C14B unassigned peptidases
MER0159724	sp008866	C14.UPB	ZP_01255220	hypothetical protein P700755_06326	subfamily C14B unassigned peptidases
MER0139476	sp007974	C14.UPB	EAU44736	hypothetical protein R2601_07718	subfamily C14B unassigned peptidases
MER0429422	sp011243	C14.UPB	ZP_01756545	hypothetical protein RSK20926_01592, partial	subfamily C14B unassigned peptidases
MER0251520	sp024574	C14.UPB	YP_004653985	hypothetical protein Runsl_0403	subfamily C14B unassigned peptidases
MER0172941	sp008869	C14.UPB	ZP_01546317	hypothetical protein SIAM614_12698	subfamily C14B unassigned peptidases
MER0429418	sp008869	C14.UPB	ZP_01546348	hypothetical protein SIAM614_12853	subfamily C14B unassigned peptidases
MER0137221	sp008869	C14.UPB	EAV42966	hypothetical protein SIAM614_16517	subfamily C14B unassigned peptidases
MER0429421	sp008869	C14.UPB	ZP_01549038	hypothetical protein SIAM614_21902	subfamily C14B unassigned peptidases
MER0173392	sp008869	C14.UPB	ZP_01549040	hypothetical protein SIAM614_21912	subfamily C14B unassigned peptidases
MER0211840	sp023167	C14.UPB	YP_003708637	hypothetical protein wcw_0256	subfamily C14B unassigned peptidases
MER0239790	sp001905	C14.UPB	YP_003950218	ice-like protease	subfamily C14B unassigned peptidases
MER0251563	sp024584	C14.UPB	YP_004667746	ICE-like protease	subfamily C14B unassigned peptidases
MER0067959	sp000696	C14.UPB	YP_629086	ICE-like protease p20 domain protein	subfamily C14B unassigned peptidases
MER0068446	sp000696	C14.UPB	YP_633107	ICE-like protease p20 domain protein	subfamily C14B unassigned peptidases
MER0019354	sp001993	C14.UPB	Q98IJ9	mlr2366 protein	subfamily C14B unassigned peptidases
MER0068867	sp003806	C14.UPB	YP_612838	OmpA/MotB	subfamily C14B unassigned peptidases
MER0125718	sp003736	C14.UPB	ABZ96074	Peptidase	subfamily C14B unassigned peptidases
MER0429393	sp011236	C14.UPB	YP_001205958	peptidase	subfamily C14B unassigned peptidases
MER0429394	sp011236	C14.UPB	YP_001205959	peptidase	subfamily C14B unassigned peptidases
MER0047817	sp011422	C14.UPB	ACA16115	peptidase C14 caspase catalytic subunit p20	subfamily C14B unassigned peptidases
MER0059936	sp011422	C14.UPB	ACA15469	peptidase C14 caspase catalytic subunit p20	subfamily C14B unassigned peptidases
MER0060154	sp011422	C14.UPB	ACA15102	peptidase C14 caspase catalytic subunit p20	subfamily C14B unassigned peptidases
MER0061773	sp011422	C14.UPB	ACA14617	peptidase C14 caspase catalytic subunit p20	subfamily C14B unassigned peptidases
MER0064082	sp003977	C14.UPB	ACL64889	peptidase C14 caspase catalytic subunit p20	subfamily C14B unassigned peptidases
MER0079741	sp012343	C14.UPB	ACB78899	peptidase C14 caspase catalytic subunit p20	subfamily C14B unassigned peptidases
MER0088531	sp005205	C14.UPB	YP_001378070	peptidase C14 caspase catalytic subunit p20	subfamily C14B unassigned peptidases
MER0097158	sp010743	C14.UPB	ABW66582	peptidase C14 caspase catalytic subunit p20	subfamily C14B unassigned peptidases
MER0097216	sp010743	C14.UPB	ABW68701	peptidase C14 caspase catalytic subunit p20	subfamily C14B unassigned peptidases
MER0097218	sp010743	C14.UPB	ABW68703	peptidase C14 caspase catalytic subunit p20	subfamily C14B unassigned peptidases
MER0098596	sp016793	C14.UPB	ACB25009	peptidase C14 caspase catalytic subunit p20	subfamily C14B unassigned peptidases
MER0108350	sp015084	C14.UPB	ACG72681	peptidase C14 caspase catalytic subunit p20	subfamily C14B unassigned peptidases
MER0108667	sp015084	C14.UPB	ACG72217	peptidase C14 caspase catalytic subunit p20	subfamily C14B unassigned peptidases
MER0121075	sp011422	C14.UPB	ACA19357	peptidase C14 caspase catalytic subunit p20	subfamily C14B unassigned peptidases
MER0123770	sp000866	C14.UPB	ZP_02295172	peptidase C14 caspase catalytic subunit p20	subfamily C14B unassigned peptidases
MER0126246	sp011019	C14.UPB	ACD94803	peptidase C14 caspase catalytic subunit p20	subfamily C14B unassigned peptidases
MER0133808	sp000866	C14.UPB	ACI59215	peptidase C14 caspase catalytic subunit p20	subfamily C14B unassigned peptidases
MER0133809	sp000866	C14.UPB	ACI59222	peptidase C14 caspase catalytic subunit p20	subfamily C14B unassigned peptidases
MER0135580	sp016911	C14.UPB	ACK51801	peptidase C14 caspase catalytic subunit p20	subfamily C14B unassigned peptidases
MER0135874	sp016911	C14.UPB	ACK51312	peptidase C14 caspase catalytic subunit p20	subfamily C14B unassigned peptidases
MER0135930	sp016911	C14.UPB	ACK51301	peptidase C14 caspase catalytic subunit p20	subfamily C14B unassigned peptidases
MER0153100	sp015180	C14.UPB	ACL60995	peptidase C14 caspase catalytic subunit p20	subfamily C14B unassigned peptidases
MER0153601	sp015180	C14.UPB	ACL56326	peptidase C14 caspase catalytic subunit p20	subfamily C14B unassigned peptidases
MER0153641	sp015180	C14.UPB	ACL57450	peptidase C14 caspase catalytic subunit p20	subfamily C14B unassigned peptidases
MER0153938	sp003977	C14.UPB	ACL64330	peptidase C14 caspase catalytic subunit p20	subfamily C14B unassigned peptidases
MER0182149	sp003793	C14.UPB	ACS62053	peptidase C14 caspase catalytic subunit p20	subfamily C14B unassigned peptidases
MER0194505	sp019385	C14.UPB	ACS78211	peptidase C14 caspase catalytic subunit p20	subfamily C14B unassigned peptidases
MER0194506	sp019385	C14.UPB	ACS78236	peptidase C14 caspase catalytic subunit p20	subfamily C14B unassigned peptidases
MER0194580	sp019385	C14.UPB	ACS80165	peptidase C14 caspase catalytic subunit p20	subfamily C14B unassigned peptidases
MER0195103	sp003454	C14.UPB	ACX74517	peptidase C14 caspase catalytic subunit p20	subfamily C14B unassigned peptidases
MER0221981	sp022843	C14.UPB	YP_003818492	peptidase C14 caspase catalytic subunit p20	subfamily C14B unassigned peptidases
MER0231071	sp002760	C14.UPB	YP_004107842	peptidase C14 caspase catalytic subunit p20	subfamily C14B unassigned peptidases
MER0235047	sp023788	C14.UPB	YP_004160296	peptidase C14 caspase catalytic subunit p20	subfamily C14B unassigned peptidases
MER0235296	sp018386	C14.UPB	YP_004152892	peptidase c14 caspase catalytic subunit p20	subfamily C14B unassigned peptidases
MER0239535	sp023666	C14.UPB	YP_004271353	peptidase C14 caspase catalytic subunit p20	subfamily C14B unassigned peptidases
MER0241301	sp018541	C14.UPB	YP_003022184	peptidase C14 caspase catalytic subunit p20	subfamily C14B unassigned peptidases
MER0241310	sp021595	C14.UPB	YP_003166661	peptidase C14 caspase catalytic subunit p20	subfamily C14B unassigned peptidases
MER0241355	sp021595	C14.UPB	YP_003166159	peptidase C14 caspase catalytic subunit p20	subfamily C14B unassigned peptidases
MER0247663	sp024545	C14.UPB	YP_004450436	peptidase C14 caspase catalytic subunit p20	subfamily C14B unassigned peptidases
MER0248904	sp024550	C14.UPB	YP_004526394	peptidase C14 caspase catalytic subunit p20	subfamily C14B unassigned peptidases
MER0249680	sp024538	C14.UPB	YP_004514314	peptidase C14 caspase catalytic subunit p20	subfamily C14B unassigned peptidases
MER0249713	sp024545	C14.UPB	YP_004448044	peptidase C14 caspase catalytic subunit p20	subfamily C14B unassigned peptidases
MER0249715	sp024545	C14.UPB	YP_004448045	peptidase C14 caspase catalytic subunit p20	subfamily C14B unassigned peptidases
MER0250918	sp021127	C14.UPB	YP_004608898	peptidase C14 caspase catalytic subunit p20	subfamily C14B unassigned peptidases
MER0251508	sp021127	C14.UPB	YP_004610327	peptidase C14 caspase catalytic subunit p20	subfamily C14B unassigned peptidases
MER0252912	sp021127	C14.UPB	YP_004612439	peptidase C14 caspase catalytic subunit p20	subfamily C14B unassigned peptidases
MER0054903	sp004898	C14.UPB	ABA04535	peptidase C14, caspase catalytic subunit p20	subfamily C14B unassigned peptidases
MER0054908	sp004898	C14.UPB	ABA04917	peptidase C14, caspase catalytic subunit p20	subfamily C14B unassigned peptidases
MER0061384	sp002760	C14.UPB	YP_486595	Peptidase C14, caspase catalytic subunit p20	subfamily C14B unassigned peptidases
MER0061385	sp002760	C14.UPB	ABE39698	peptidase C14, caspase catalytic subunit p20	subfamily C14B unassigned peptidases
MER0063894	sp002760	C14.UPB	ABD06868	Peptidase C14, caspase catalytic subunit p20	subfamily C14B unassigned peptidases
MER0071385	sp004011	C14.UPB	ABK16255	peptidase C14, caspase catalytic subunit p20	subfamily C14B unassigned peptidases
MER0073254	sp002760	C14.UPB	ABJ06893	peptidase C14, caspase catalytic subunit p20	subfamily C14B unassigned peptidases
MER0073268	sp002760	C14.UPB	ABJ08132	peptidase C14, caspase catalytic subunit p20	subfamily C14B unassigned peptidases
MER0074191	sp000748	C14.UPB	ABL72912	peptidase C14, caspase catalytic subunit p20	subfamily C14B unassigned peptidases
MER0080821	sp004008	C14.UPB	ABJ82609	peptidase C14, caspase catalytic subunit p20	subfamily C14B unassigned peptidases
MER0081083	sp000748	C14.UPB	ABL70549	peptidase C14, caspase catalytic subunit p20	subfamily C14B unassigned peptidases
MER0087329	sp008869	C14.UPB	ZP_01549041	Peptidase C14, caspase catalytic subunit p20	bacterial metacaspase
MER0087352	sp008869	C14.UPB	EAV44553	peptidase C14, caspase catalytic subunit p20	subfamily C14B unassigned peptidases
MER0087470	sp010772	C14.UPB	YP_001261885	peptidase C14, caspase catalytic subunit p20	subfamily C14B unassigned peptidases
MER0241288	sp020847	C14.UPB	EES51787	peptidase C14, caspase catalytic subunit p20	subfamily C14B unassigned peptidases
MER0318119	sp027451	C14.UPB	ZP_08863410	peptidase C14, caspase catalytic subunit p20	subfamily C14B unassigned peptidases
MER0429441	sp018564	C14.UPB	ZP_05081014	peptidase C14, caspase catalytic subunit p20	subfamily C14B unassigned peptidases
MER0026657	sp002535	C14.UPB	NP_644665	polysaccharide deacetylase	subfamily C14B unassigned peptidases
MER0043947	sp002015	C14.UPB	YP_453398	polysaccharide deacetylase	subfamily C14B unassigned peptidases
MER0065401	sp020801	C14.UPB	YP_589366	polysaccharide deacetylase	subfamily C14B unassigned peptidases
MER0094747	sp005387	C14.UPB	ACD18380	protein of unknown function DUF323	subfamily C14B unassigned peptidases
MER0038062	sp000181	C14.UPB	Q7WDK3	Putative exported protein	subfamily C14B unassigned peptidases
MER0092802	sp000979	C14.UPB	CAQ48044	putative polysaccharide deacetylase family protein	subfamily C14B unassigned peptidases
MER0114374	sp001960	C14.UPB	CAN96770	putative WD-40 repeat protein	subfamily C14B unassigned peptidases
MER0249411	sp024545	C14.UPB	YP_004449379	sulfatase-modifying factor protein	subfamily C14B unassigned peptidases
MER0249425	sp024545	C14.UPB	YP_004449380	sulfatase-modifying factor protein	subfamily C14B unassigned peptidases
MER0249428	sp024545	C14.UPB	YP_004449381	sulfatase-modifying factor protein	subfamily C14B unassigned peptidases
MER0429492	sp004436	C14.UPB	ZP_09752183	type VI secretion lipoprotein, VC_A0113 family	subfamily C14B unassigned peptidases
MER0058797	sp004764	C14.UPB	BAE49425	Uncharacterized protein	subfamily C14B unassigned peptidases
MER0026658	sp002114	C14.UPB	Q8EYH5	unknown protein	subfamily C14B unassigned peptidases
MER0054633	sp003166	C14.UPB	YP_005468014	unnamed protein product	subfamily C14B unassigned peptidases
MER0064978	sp027192	C14.UPB	YP_005475232	unnamed protein product	subfamily C14B unassigned peptidases
MER0066785	sp027194	C14.UPB	YP_005447678	unnamed protein product	subfamily C14B unassigned peptidases
MER0068118	sp027194	C14.UPB	YP_005448609	unnamed protein product	subfamily C14B unassigned peptidases
MER0068559	sp027194	C14.UPB	YP_005449106	unnamed protein product	subfamily C14B unassigned peptidases
MER0069642	sp027194	C14.UPB	YP_005449622	unnamed protein product	subfamily C14B unassigned peptidases
MER0069643	sp027194	C14.UPB	YP_005449681	unnamed protein product	subfamily C14B unassigned peptidases
MER0072543	sp027194	C14.UPB	YP_005450789	unnamed protein product	subfamily C14B unassigned peptidases
MER0073436	sp027194	C14.UPB	YP_005451244	unnamed protein product	subfamily C14B unassigned peptidases
MER0074538	sp027194	C14.UPB	YP_005451474	unnamed protein product	subfamily C14B unassigned peptidases
MER0085498	sp027194	C14.UPB	YP_005452897	unnamed protein product	subfamily C14B unassigned peptidases
MER0089028	sp027194	C14.UPB	YP_005453460	unnamed protein product	subfamily C14B unassigned peptidases
MER0091786	sp027194	C14.UPB	YP_005454158	unnamed protein product	subfamily C14B unassigned peptidases
MER0146627	sp027206	C14.UPB	YP_005321559	unnamed protein product	subfamily C14B unassigned peptidases
MER0146670	sp027206	C14.UPB	YP_005321927	unnamed protein product	subfamily C14B unassigned peptidases
MER0147297	sp027206	C14.UPB	YP_005323092	unnamed protein product	subfamily C14B unassigned peptidases
MER0187597	sp027197	C14.UPB	YP_005371166	unnamed protein product	subfamily C14B unassigned peptidases
MER0188345	sp027197	C14.UPB	YP_005373227	unnamed protein product	subfamily C14B unassigned peptidases
MER0188406	sp027197	C14.UPB	YP_005373756	unnamed protein product	subfamily C14B unassigned peptidases
MER0283557	sp022951	C14.UPB	YP_005053807	unnamed protein product	subfamily C14B unassigned peptidases
MER0283799	sp027097	C14.UPB	YP_005040970	unnamed protein product	subfamily C14B unassigned peptidases
MER0286448	sp002750	C14.UPB	YP_005168919	unnamed protein product	subfamily C14B unassigned peptidases
MER0286457	sp002750	C14.UPB	YP_005168926	unnamed protein product	subfamily C14B unassigned peptidases
MER0241381	sp010677	C14.UPB	ZP_01690029	WD-40 repeat	subfamily C14B unassigned peptidases
MER0251314	sp021127	C14.UPB	YP_004610324	WD40 repeat-containing protein	subfamily C14B unassigned peptidases
MER0241323	sp002903	C14.UPB	ZP_07333476	YD repeat protein	subfamily C14B unassigned peptidases
MER0128828	sp018436	C14.UPW	GEBA2500529669	hypothetical protein	family C14 unassigned peptidases
MER0251723	sp024574	C14.UPW	YP_004656285	hypothetical protein Runsl_2756	family C14 unassigned peptidases
MER0120826	sp012359	C14.UPW	ACG57906	peptidase C14 caspase catalytic subunit p20	family C14 unassigned peptidases
MER0242903	sp024081	C14.UPW	YP_004365656	peptidase C14 caspase catalytic subunit p20	family C14 unassigned peptidases
MER0040431	sp001980	C15.001	YP_005317508	pcp gene product	family C15 unassigned peptidases
MER0115822	sp015058	C15.001	ABZ86840	Pyroglutamyl-peptidase I	family C15 unassigned peptidases
MER0138064	sp018543	C15.001	YP_002171110	pyrrolidone-carboxylate peptidase	family C15 unassigned peptidases
MER0255119	sp024602	C15.001	YP_004646726	Pyrrolidone-carboxylate peptidase	family C15 unassigned peptidases
MER0697158	sp002608	C15.UNW	Q8EIK4	Putative periplasmic peptidase C15 superfamily	family C15 non peptidase homologues
MER0696931	sp000932	C15.UNW	Q0HRE4	Uncharacterized protein	family C15 non peptidase homologues
MER0696963	sp028074	C15.UNW	U1ML35	Uncharacterized protein	family C15 non peptidase homologues
MER0696996	sp000834	C15.UNW	Q3IJ05	Uncharacterized protein	family C15 non peptidase homologues
MER0697070	sp003934	C15.UNW	Q12JX7	Uncharacterized protein	family C15 non peptidase homologues
MER0697220	sp023486	C15.UNW	E1SQK1	Uncharacterized protein	family C15 non peptidase homologues
MER0697640	sp028118	C15.UNW	U1L1G1	Uncharacterized protein	family C15 non peptidase homologues
MER0697694	sp028075	C15.UNW	U1K4C4	Uncharacterized protein	family C15 non peptidase homologues
MER0697728	sp000932	C15.UNW	A0L0U5	Uncharacterized protein	family C15 non peptidase homologues
MER0697830	sp002126	C15.UNW	D4ZCA9	Uncharacterized protein	family C15 non peptidase homologues
MER0224757	sp005399	C19.098	ZP_02466831	ubiquitin-specific proteinase 31, putative	TssM peptidase
MER0510793	sp903231	C19.UPW	YP_008871824	hypothetical protein	family C19 unassigned peptidases
MER0480281	sp016219	C19.UPW	YP_002794879	MltD	family C19 unassigned peptidases
MER0001351	sp000818	C25.001	CPG1_PORGI	arginine-specific cysteine proteinase RgpB	gingipain RgpA
MER0002599	sp000818	C25.002	P72197	lysine-specific cysteine proteinase Kgp	gingipain Kgp
MER0247587	sp000818	C25.002	YP_004510134	lysine-specific cysteine proteinase Kgp	gingipain Kgp
MER0002270	sp000818	C25.003	CPG2_PORGI	Gingipain R	gingipain RgpB
MER0034582	sp000818	C25.004	BAG32541	conserved hypothetical protein	PG0026 peptidase
MER0203648	sp022652	C25.004	ADE81582	conserved hypothetical protein	PG0026 peptidase
MER0435971	sp018607	C25.004	ZP_01052732	conserved hypothetical protein	family C25 unassigned peptidases
MER0436267	sp022663	C25.004	ZP_05916150	conserved hypothetical protein	family C25 unassigned peptidases
MER0436288	sp018889	C25.004	ZP_06252414	conserved hypothetical protein	family C25 unassigned peptidases
MER0436341	sp023395	C25.004	ZP_07061727	conserved hypothetical protein	family C25 unassigned peptidases
MER0436356	sp023469	C25.004	ZP_07322748	conserved hypothetical protein	family C25 unassigned peptidases
MER0094081	sp010677	C25.004	A1ZVJ9	Fjo24	family C25 unassigned peptidases
MER0347485	sp028068	C25.004	ZP_10334725	hypothetical protein BN8_06168	family C25 unassigned peptidases
MER0435809	sp018403	C25.004	YP_003120881	hypothetical protein Cpin_1182	PG0026 peptidase
MER0436406	sp024908	C25.004	ZP_08083514	hypothetical protein HMPREF0663_10049	family C25 unassigned peptidases
MER0436479	sp024916	C25.004	ZP_08674823	hypothetical protein HMPREF9144_0633	family C25 unassigned peptidases
MER0436478	sp025071	C25.004	ZP_08673612	hypothetical protein HMPREF9419_1844	family C25 unassigned peptidases
MER0436499	sp025104	C25.004	ZP_08833463	hypothetical protein HMPREF9431_02127	family C25 unassigned peptidases
MER0436608	sp027519	C25.004	ZP_09552687	hypothetical protein HMPREF9944_00951	family C25 unassigned peptidases
MER0227148	sp023519	C25.004	YP_003998223	hypothetical protein Lbys_2176	family C25 unassigned peptidases
MER0347484	sp028121	C25.004	YP_006528133	hypothetical protein MROS_1888	PG0026 peptidase
MER0436039	sp012337	C25.004	ZP_02033381	hypothetical protein PARMER_03406	family C25 unassigned peptidases
MER0436090	sp019508	C25.004	ZP_03474626	hypothetical protein PRABACTJOHN_00280	family C25 unassigned peptidases
MER0436659	sp027521	C25.004	ZP_09967427	peptidase family C25	family C25 unassigned peptidases
MER0435914	sp002222	C25.004	YP_006298211	Por secretion system C-terminal sorting domain protein	family C25 unassigned peptidases
MER0242871	sp024085	C25.004	YP_004328408	putative lipoprotein	family C25 unassigned peptidases
MER0435641	sp025004	C25.004	EHO56782	putative lipoprotein	family C25 unassigned peptidases
MER0713020	sp023437	C25.004	D7JEG4	Putative uncharacterized protein	PG0026 peptidase
MER0711406	sp029530	C25.004	K1M2A9	Uncharacterized protein	PG0026 peptidase
MER0276305	sp029874	C25.UNW	ZP_20987235	hypothetical protein C942_02389	family C25 non peptidase homologues
MER0711188	sp011238	C25.UNW	A3HW99	Putative outer membrane insertion C-signal	family C25 non peptidase homologues
MER0436449	sp025003	C25.UPW	ZP_08445800	conserved domain protein	PG0026 peptidase
MER0136144	sp002748	C25.UPW	ABY34320	conserved hypothetical protein	family C25 unassigned peptidases
MER0136282	sp010773	C25.UPW	ACL24774	conserved hypothetical protein	family C25 unassigned peptidases
MER0155397	sp016937	C25.UPW	ACM52613	conserved hypothetical protein	family C25 unassigned peptidases
MER0435534	sp022671	C25.UPW	EEX71175	conserved hypothetical protein	family C25 unassigned peptidases
MER0435970	sp010740	C25.UPW	ZP_01050711	conserved hypothetical protein	family C25 unassigned peptidases
MER0436344	sp020942	C25.UPW	ZP_07086663	conserved hypothetical protein	PG0026 peptidase
MER0295397	sp024997	C25.UPW	ZP_08321980	FG-GAP repeat protein	family C25 unassigned peptidases
MER0435446	sp005464	C25.UPW	AAM92030	Fjo24	family C25 unassigned peptidases
MER0295385	sp024070	C25.UPW	YP_004342858	Gingipain R	family C25 unassigned peptidases
MER0112941	sp018436	C25.UPW	GEBA2500531354	hypothetical protein	family C25 unassigned peptidases
MER0133160	sp018411	C25.UPW	GEBA2500511064	hypothetical protein	family C25 unassigned peptidases
MER0500036	sp033630	C25.UPW	YP_007644702	hypothetical protein	family C25 unassigned peptidases
MER0436096	sp020756	C25.UPW	ZP_03676764	hypothetical protein BACCELL_01092	family C25 unassigned peptidases
MER0436073	sp018348	C25.UPW	ZP_03012500	hypothetical protein BACINT_00048	family C25 unassigned peptidases
MER0436496	sp024888	C25.UPW	ZP_08818605	hypothetical protein BZARG_2831	family C25 unassigned peptidases
MER0215302	sp005404	C25.UPW	YP_003715857	hypothetical protein CA2559_05470	family C25 unassigned peptidases
MER0436606	sp027345	C25.UPW	ZP_09549243	hypothetical protein Calab_1286	PG0026 peptidase
MER0435936	sp002710	C25.UPW	YP_679820	hypothetical protein CHU_3237	family C25 unassigned peptidases
MER0436017	sp011241	C25.UPW	ZP_01733325	hypothetical protein FBBAL38_03205	family C25 unassigned peptidases
MER0435808	sp020991	C25.UPW	YP_003095088	hypothetical protein FIC_00568	PG0026 peptidase
MER0435742	sp011947	C25.UPW	YP_001296280	hypothetical protein FP1388	family C25 unassigned peptidases
MER0273912	sp005130	C25.UPW	YP_001544419	hypothetical protein Haur_1648	PG0026 peptidase
MER0273937	sp005130	C25.UPW	YP_001547862	hypothetical protein Haur_5106	PG0026 peptidase
MER0436648	sp027387	C25.UPW	ZP_09893932	hypothetical protein HJ01_00453	family C25 unassigned peptidases
MER0295387	sp027442	C25.UPW	ZP_09338371	hypothetical protein HMPREF1033_01717	family C25 unassigned peptidases
MER0436543	sp027394	C25.UPW	ZP_09120621	hypothetical protein HMPREF9332_00178	family C25 unassigned peptidases
MER0436541	sp027518	C25.UPW	ZP_09109282	hypothetical protein HMPREF9441_03325	PG0026 peptidase
MER0436439	sp024997	C25.UPW	ZP_08319937	hypothetical protein HMPREF9442_01010	PG0026 peptidase
MER0276371	sp029370	C25.UPW	ZP_18881794	hypothetical protein HMPREF9447_02827	family C25 unassigned peptidases
MER0436048	sp015106	C25.UPW	ZP_02161264	hypothetical protein KAOT1_21002	family C25 unassigned peptidases
MER0245985	sp024976	C25.UPW	YP_004429832	hypothetical protein Krodi_0579	family C25 unassigned peptidases
MER0250829	sp024576	C25.UPW	YP_004579959	hypothetical protein Lacal_1683	family C25 unassigned peptidases
MER0435973	sp007957	C25.UPW	ZP_01062280	hypothetical protein MED217_03660	family C25 unassigned peptidases
MER0436361	sp023518	C25.UPW	ZP_07685061	hypothetical protein OSCT_1012	PG0026 peptidase
MER0239707	sp023727	C25.UPW	YP_004273603	hypothetical protein Pedsa_1213	family C25 unassigned peptidases
MER0435749	sp007980	C25.UPW	YP_001434098	hypothetical protein Rcas_4047	PG0026 peptidase
MER0092929	sp002063	C25.UPW	YP_006016592	hypothetical protein RIA_0048	PG0026 peptidase
MER0116768	sp010770	C25.UPW	ABQ89612	hypothetical protein RoseRS_1205	PG0026 peptidase
MER0251231	sp024574	C25.UPW	YP_004654178	hypothetical protein Runsl_0603	family C25 unassigned peptidases
MER0238086	sp016040	C25.UPW	YP_001740143	hypothetical protein; putative signal peptide	family C25 unassigned peptidases
MER0711080	sp010740	C25.UPW	A0A0A2GW29	Peptidase C25	family C25 unassigned peptidases
MER0295386	sp027345	C25.UPW	ZP_09550044	peptidase C25 gingipain	family C25 unassigned peptidases
MER0295394	sp027436	C25.UPW	ZP_10115102	Peptidase family C25	PG0026 peptidase
MER0712450	sp028055	C25.UPW	I3Z0M7	Peptidase family C25	family C25 unassigned peptidases
MER0152337	sp027198	C25.UPW	YP_005356678	porU gene product	family C25 unassigned peptidases
MER0179279	sp016040	C25.UPW	YP_001740281	putative Gingipain R	family C25 unassigned peptidases
MER0709271	sp000147	C25.UPW	A0A0E4BER5	Putative lipoprotein	family C25 unassigned peptidases
MER0684601	sp029372	C25.UPW	K5ZTW9	Uncharacterized protein	family C25 unassigned peptidases
MER0707875	sp028068	C25.UPW	I2GJE9	Uncharacterized protein	family C25 unassigned peptidases
MER0709648	sp029529	C25.UPW	L1N0U3	Uncharacterized protein	family C25 unassigned peptidases
MER0710133	sp012337	C25.UPW	K5YJP9	Uncharacterized protein	family C25 unassigned peptidases
MER0711489	sp029373	C25.UPW	L0FTL9	Uncharacterized protein	family C25 unassigned peptidases
MER0711942	sp028052	C25.UPW	I3YW32	Uncharacterized protein	family C25 unassigned peptidases
MER0711992	sp028055	C25.UPW	I3ZA64	Uncharacterized protein	family C25 unassigned peptidases
MER0712232	sp028057	C25.UPW	I4AMI8	Uncharacterized protein	family C25 unassigned peptidases
MER0712971	sp018411	C25.UPW	C6W3P5	Uncharacterized protein	family C25 unassigned peptidases
MER0712992	sp028131	C25.UPW	J3C858	Uncharacterized protein	family C25 unassigned peptidases
MER0713038	sp018411	C25.UPW	C6W3P4	Uncharacterized protein	family C25 unassigned peptidases
MER0713048	sp027340	C25.UPW	I0K9M8	Uncharacterized protein	family C25 unassigned peptidases
MER0713126	sp029369	C25.UPW	M7XC98	Uncharacterized protein	family C25 unassigned peptidases
MER0109282	sp027212	C25.UPW	YP_005846348	unnamed protein product	PG0026 peptidase
MER0146898	sp027206	C25.UPW	YP_005322469	unnamed protein product	family C25 unassigned peptidases
MER0147517	sp027206	C25.UPW	YP_005323326	unnamed protein product	family C25 unassigned peptidases
MER0177592	sp027195	C25.UPW	YP_005441010	unnamed protein product	PG0026 peptidase
MER0195057	sp003454	C25.UPW	YP_005820541	unnamed protein product	PG0026 peptidase
MER0285002	sp027109	C25.UPW	YP_005010596	unnamed protein product	family C25 unassigned peptidases
MER0285156	sp027108	C25.UPW	YP_004989394	unnamed protein product	PG0026 peptidase
MER0061377	sp002760	C26.957	ABE39504	GMP synthase	GMP synthase
MER0098412	sp016793	C26.964	ACB25089	CTP synthase	CTP synthetase
MER0115336	sp016961	C26.964	CAM11962	CTP synthase	CTP synthetase
MER0447418	sp027304	C26.964	ZP_09884444	CTP synthase	CTP synthetase
MER0442492	sp027358	C26.A07	ZP_09179628	GMP synthase	At1g63660
MER0442872	sp002760	C26.A07	YP_001991487	GMP synthase	At1g63660
MER0090276	sp000280	C26.UNW	ACD53442	cobyric acid synthase CobQ	family C26 non peptidase homologues
MER0451119	sp000281	C26.UPW	ZP_04527749	cobyric acid synthase CobQ	family C26 unassigned peptidases
MER0449467	sp027146	C26.UPW	ZP_08934548	gamma-glutamyl-gamma-aminobutyrate hydrolase	family C26 unassigned peptidases
MER0277570	sp025106	C26.UPW	YP_004896932	glutamine amidotransferase	family C26 unassigned peptidases
MER0446978	sp020832	C26.UPW	ZP_06577634	glutamine amidotransferase	family C26 unassigned peptidases
MER0196893	sp022140	C26.UPW	ADB48405	glutamine amidotransferase-like protein	family C26 unassigned peptidases
MER0499883	sp034464	C26.UPW	YP_008616374	hypothetical protein	family C26 unassigned peptidases
MER0173294	sp018859	C26.UPW	ZP_03301185	hypothetical protein BACDOR_02564	family C26 unassigned peptidases
MER0450937	sp024596	C26.UPW	YP_004708294	hypothetical protein CXIVA_12260	family C26 unassigned peptidases
MER0450035	sp029281	C26.UPW	ZP_09521190	hypothetical protein HMPREF9623_00854	family C26 unassigned peptidases
MER0073474	sp005451	C26.UPW	ABK52871	peptidase C26	family C26 unassigned peptidases
MER0448297	sp023688	C26.UPW	ZP_07822321	peptidase C26	family C26 unassigned peptidases
MER0450536	sp025087	C26.UPW	ZP_08420139	type I secretion outer membrane protein, TolC family	family C26 unassigned peptidases
MER0715340	sp027348	C39.UNW	L0DFS9	ABC-type bacteriocin/lantibiotic exporter with N-terminal double-glycine peptidase domain	family C39 non peptidase homologues
MER0713288	sp000836	C39.UNW	A0A075P6F4	Associated protein (Putative peptidase C39) FapD	family C39 non peptidase homologues
MER0715294	sp000979	C39.UNW	M5TLK0	Bacteriocin resistance protein	family C39 non peptidase homologues
MER0716147	sp029874	C39.UNW	L8JHQ6	Bacteriocin resistance protein, putative	family C39 non peptidase homologues
MER0715981	sp028072	C39.UNW	I4N397	C39 family peptidase	family C39 non peptidase homologues
MER0713811	sp000399	C39.UNW	D4HVV1	Colicin V secretion/processing ATP-binding protein cvaB	family C39 non peptidase homologues
MER0714818	sp000399	C39.UNW	E5B1V8	Colicin V secretion/processing ATP-binding protein cvaB	family C39 non peptidase homologues
MER0714796	sp000836	C39.UNW	K0X3S2	Double-glycine peptidase	family C39 non peptidase homologues
MER0716660	sp029779	C39.UNW	M2TRS1	Fap protein	family C39 non peptidase homologues
MER0097118	sp005418	C39.UNW	ACG67412	FOG: TPR repeat 2396 protein	family C39 non peptidase homologues
MER0716418	sp005437	C39.UNW	Q2LY28	Hypothetical exported protein	family C39 non peptidase homologues
MER0197575	sp004673	C39.UNW	BAI70214	hypothetical protein	family C39 non peptidase homologues
MER0716791	sp000836	C39.UNW	A0A0B7D9I7	Lactococcin-G-processing and transport ATP-binding protein LagD	family C39 non peptidase homologues
MER0714976	sp002996	C39.UNW	K2B5K2	Metallophosphoesterase	family C39 non peptidase homologues
MER0713436	sp000979	C39.UNW	A0A064BV06	Peptidase	family C39 non peptidase homologues
MER0717337	sp023784	C39.UNW	A0A0E3Z1D2	Peptidase	family C39 non peptidase homologues
MER0716801	sp000836	C39.UNW	G8PYP8	Peptidase bacteriocin processing	family C39 non peptidase homologues
MER0713356	sp000029	C39.UNW	A0A0A5NHM0	Peptidase C39	family C39 non peptidase homologues
MER0713534	sp003793	C39.UNW	U3QNI6	Peptidase C39	family C39 non peptidase homologues
MER0714019	sp000836	C39.UNW	A0A0F4TGQ4	Peptidase C39	family C39 non peptidase homologues
MER0714864	sp881176	C39.UNW	V9QZ27	Peptidase C39	family C39 non peptidase homologues
MER0715074	sp028185	C39.UNW	A0A023CB43	Peptidase C39	family C39 non peptidase homologues
MER0715885	sp000836	C39.UNW	A0A010RKT4	Peptidase C39	family C39 non peptidase homologues
MER0715974	sp000836	C39.UNW	A0A0C2A847	Peptidase C39	family C39 non peptidase homologues
MER0716209	sp000836	C39.UNW	A0A0D9AZ60	Peptidase C39	family C39 non peptidase homologues
MER0716249	sp002870	C39.UNW	A0A0E1E3Z8	Peptidase C39	family C39 non peptidase homologues
MER0716552	sp002870	C39.UNW	A0A0A6DFX2	Peptidase C39	family C39 non peptidase homologues
MER0716607	sp002267	C39.UNW	A0A028VJ83	Peptidase C39	family C39 non peptidase homologues
MER0716637	sp000836	C39.UNW	A0A0F4TGR7	Peptidase C39	family C39 non peptidase homologues
MER0716668	sp000839	C39.UNW	A0A083UUG0	Peptidase C39	family C39 non peptidase homologues
MER0716685	sp000836	C39.UNW	A0A0F4V1N0	Peptidase C39	family C39 non peptidase homologues
MER0716825	sp002870	C39.UNW	A0A0D5XZU7	Peptidase C39	family C39 non peptidase homologues
MER0716834	sp029488	C39.UNW	A0A059L8G4	Peptidase C39	family C39 non peptidase homologues
MER0716936	sp000836	C39.UNW	U7DKX4	Peptidase C39	family C39 non peptidase homologues
MER0717172	sp000836	C39.UNW	A0A0F4V694	Peptidase C39	family C39 non peptidase homologues
MER0714980	sp003329	C39.UNW	A0A099K7E4	Peptidase C39 bacteriocin processing	family C39 non peptidase homologues
MER0715087	sp019021	C39.UNW	C4LDQ7	Peptidase C39 bacteriocin processing	family C39 non peptidase homologues
MER0715142	sp028224	C39.UNW	I9W9D7	Peptidase C39 bacteriocin processing	family C39 non peptidase homologues
MER0715418	sp018544	C39.UNW	B5WV77	Peptidase C39 bacteriocin processing	family C39 non peptidase homologues
MER0715702	sp029781	C39.UNW	L9P955	Peptidase C39 bacteriocin processing	family C39 non peptidase homologues
MER0715902	sp029490	C39.UNW	K9NKL3	Peptidase C39 bacteriocin processing	family C39 non peptidase homologues
MER0716095	sp020865	C39.UNW	D3RQ89	Peptidase C39 bacteriocin processing	family C39 non peptidase homologues
MER0716112	sp023895	C39.UNW	F0RR39	Peptidase C39 bacteriocin processing	family C39 non peptidase homologues
MER0716777	sp020765	C39.UNW	A0A0B6S811	Peptidase C39 bacteriocin processing	family C39 non peptidase homologues
MER0716988	sp024080	C39.UNW	F2NKI7	Peptidase C39 bacteriocin processing	family C39 non peptidase homologues
MER0717362	sp023595	C39.UNW	G3ISH2	Peptidase C39 bacteriocin processing	family C39 non peptidase homologues
MER0369020	sp023128	C39.UNW	YP_004349415	peptidase C39 family protein	family C39 non peptidase homologues
MER0714655	sp000839	C39.UNW	V6JI58	Peptidase C39 family protein	family C39 non peptidase homologues
MER0716877	sp002747	C39.UNW	A0A0D5V9F5	Peptidase C39 family protein	family C39 non peptidase homologues
MER0716477	sp000839	C39.UNW	I3V342	Peptidase C39, bacteriocin processing	family C39 non peptidase homologues
MER0716558	sp028066	C39.UNW	I4VP91	Peptidase protein	family C39 non peptidase homologues
MER0717343	sp000855	C39.UNW	F6G5E2	Peptidase protein	family C39 non peptidase homologues
MER0713329	sp000836	C39.UNW	I4KP32	Peptidase, C39 family	family C39 non peptidase homologues
MER0713878	sp002870	C39.UNW	J2ERL6	Peptidase, C39 family	family C39 non peptidase homologues
MER0715342	sp000836	C39.UNW	J2YC08	Peptidase, C39 family	family C39 non peptidase homologues
MER0717081	sp028071	C39.UNW	I4L874	Peptidase, C39 family	family C39 non peptidase homologues
MER0714936	sp000839	C39.UNW	A0A0D1PJ02	Pseudomonas putida strain UASWS0946 Contig165, whole genome shotgun sequence	family C39 non peptidase homologues
MER0717122	sp020771	C39.UNW	I7GU40	Putative bacteriocin processing peptidase C39	family C39 non peptidase homologues
MER0715319	sp000029	C39.UNW	W0A063	Putative double-glycine peptidase	family C39 non peptidase homologues
MER0715596	sp901041	C39.UNW	A0A078MGL4	Putative double-glycine peptidase	family C39 non peptidase homologues
MER0716850	sp027163	C39.UNW	I3Y533	Putative double-glycine peptidase	family C39 non peptidase homologues
MER0717175	sp028214	C39.UNW	J3G075	Putative double-glycine peptidase	family C39 non peptidase homologues
MER0717405	sp000836	C39.UNW	V7E9V1	Putative double-glycine peptidase	family C39 non peptidase homologues
MER0713670	sp000979	C39.UNW	M5CMC4	Putative microcin-H47 secretion/processing ATP-binding protein mchF	family C39 non peptidase homologues
MER0717289	sp019514	C39.UNW	B8KXL1	Putative peptidase	family C39 non peptidase homologues
MER0713411	sp029521	C39.UNW	K5YTC9	Putative peptidase C39	family C39 non peptidase homologues
MER0717394	sp024061	C39.UNW	F0J4R0	Putative peptidase C39	family C39 non peptidase homologues
MER0715520	sp018786	C39.UNW	C1CUH1	Putative Peptidase C39, bacteriocin processing	family C39 non peptidase homologues
MER0716315	sp029736	C39.UNW	M4JZB9	Putative periplasmic protein	family C39 non peptidase homologues
MER0717256	sp000836	C39.UNW	L7H8T3	Putative periplasmic protein	family C39 non peptidase homologues
MER0715409	sp000855	C39.UNW	D8P7A1	Putative rhs-related protein	family C39 non peptidase homologues
MER0716610	sp000855	C39.UNW	Q8XTG0	Putative rhs-related protein	family C39 non peptidase homologues
MER0714100	sp000855	C39.UNW	Q8XSJ7	Putative rhs-related transmembrane protein	family C39 non peptidase homologues
MER0717308	sp000855	C39.UNW	D8P152	Putative rhs-related transmembrane protein	family C39 non peptidase homologues
MER0716657	sp025005	C39.UNW	G2E1I4	RHS repeat-associated core domain protein	family C39 non peptidase homologues
MER0713226	sp000855	C39.UNW	A0A0A1PLZ6	Rhs-related protein	family C39 non peptidase homologues
MER0717111	sp000855	C39.UNW	F6G835	Rhs-related protein	family C39 non peptidase homologues
MER0714804	sp000979	C39.UNW	A0A0D0JLG7	Stenotrophomonas maltophilia strain ZBG7B contig_7, whole genome shotgun sequence	family C39 non peptidase homologues
MER0713253	sp000836	C39.UNW	A0A0D0ICR1	Strain MEP34 contig_28, whole genome shotgun sequence	family C39 non peptidase homologues
MER0715583	sp000836	C39.UNW	A0A0D0MTC5	Strain UM270 sctg_0122_0001, whole genome shotgun sequence	family C39 non peptidase homologues
MER0713513	sp029488	C39.UNW	A0A024E462	Uncharacterized protein	family C39 non peptidase homologues
MER0713949	sp018388	C39.UNW	B4RGJ1	Uncharacterized protein	family C39 non peptidase homologues
MER0714108	sp005449	C39.UNW	A4BMV3	Uncharacterized protein	family C39 non peptidase homologues
MER0715226	sp027153	C39.UNW	U3GHL7	Uncharacterized protein	family C39 non peptidase homologues
MER0716874	sp002996	C39.UNW	K2D3G0	Uncharacterized protein	family C39 non peptidase homologues
MER0716971	sp000854	C39.UNW	F8GMY9	Uncharacterized protein	family C39 non peptidase homologues
MER0717150	sp029427	C39.UNW	K9DZT6	Uncharacterized protein	family C39 non peptidase homologues
MER0717404	sp002858	C39.UNW	X5GRL1	Uncharacterized protein	family C39 non peptidase homologues
MER0715242	sp020747	C39.UNW	D0KW21	YD repeat protein	family C39 non peptidase homologues
MER0445987	sp020870	C39.UPW	ZP_05291597	bacteriocin resistance protein, putative	family C39 unassigned peptidases
MER0011547	sp000704	C39.UPW	CAM10079	Bacteriocin-resistance protein	family C39 unassigned peptidases
MER0445993	sp024569	C39.UPW	ZP_08099427	C39 family peptidase	family C39 unassigned peptidases
MER0446002	sp022952	C39.UPW	ZP_05704730	C39 family peptidase	family C39 unassigned peptidases
MER0075474	sp005210	C39.UPW	CAL95644	conserved hypothetical peptidase	family C39 unassigned peptidases
MER0445986	sp016219	C39.UPW	YP_002796366	double-glycine peptidase	family C39 unassigned peptidases
MER0013740	sp000835	C39.UPW	Q9I2F1	hypothetical protein	family C39 unassigned peptidases
MER0033669	sp002917	C39.UPW	Q7P082	Hypothetical protein	family C39 unassigned peptidases
MER0399896	sp865447	C39.UPW	YP_008881573	hypothetical protein	family C39 unassigned peptidases
MER0496808	sp057339	C39.UPW	YP_008763626	hypothetical protein	family C39 unassigned peptidases
MER0505325	sp033783	C39.UPW	YP_008954646	hypothetical protein	family C39 unassigned peptidases
MER0506086	sp024056	C39.UPW	YP_007657769	hypothetical protein	family C39 unassigned peptidases
MER0506418	sp030290	C39.UPW	YP_008000426	hypothetical protein	family C39 unassigned peptidases
MER0509606	sp015070	C39.UPW	YP_008527392	hypothetical protein	family C39 unassigned peptidases
MER0446021	sp021600	C39.UPW	ZP_02196875	hypothetical protein 1103602000581_AND4_14013	family C39 unassigned peptidases
MER0445905	sp005070	C39.UPW	BAL22569	hypothetical protein AZKH_0223	family C39 unassigned peptidases
MER0039625	sp018667	C39.UPW	YP_159675-1	hypothetical protein ebA4686	family C39 unassigned peptidases
MER0446031	sp027153	C39.UPW	ZP_08893703	hypothetical protein HMPREF0989_01949	family C39 unassigned peptidases
MER0446018	sp002121	C39.UPW	YP_132111	hypothetical protein PBPRB0438	family C39 unassigned peptidases
MER0068267	sp005700	C39.UPW	YP_608507	hypothetical protein PSEEN2942	family C39 unassigned peptidases
MER0445992	sp002601	C39.UPW	YP_001446668	hypothetical protein VIBHAR_03496	family C39 unassigned peptidases
MER0031298	sp000855	C39.UPW	Q8Y291	Hypothetical signal peptide protein rsc0445	family C39 unassigned peptidases
MER0223609	sp023470	C39.UPW	YP_003898690	K06992	family C39 unassigned peptidases
MER0063826	sp018407	C39.UPW	YP_003199306	peptidase C39 bacteriocin processing	family C39 unassigned peptidases
MER0086704	sp005387	C39.UPW	ACD17354	peptidase C39 bacteriocin processing	family C39 unassigned peptidases
MER0088142	sp000979	C39.UPW	ACF51795	peptidase C39 bacteriocin processing	family C39 unassigned peptidases
MER0088421	sp003793	C39.UPW	ACD28556	peptidase C39 bacteriocin processing	family C39 unassigned peptidases
MER0096048	sp003793	C39.UPW	ACD25479	peptidase C39 bacteriocin processing	family C39 unassigned peptidases
MER0196425	sp022137	C39.UPW	ADB17484	peptidase C39 bacteriocin processing	family C39 unassigned peptidases
MER0204008	sp022135	C39.UPW	ADG16249	peptidase C39 bacteriocin processing	family C39 unassigned peptidases
MER0272670	sp024872	C39.UPW	YP_004783413	peptidase C39 bacteriocin processing	family C39 unassigned peptidases
MER0446048	sp020746	C39.UPW	ZP_07015335	peptidase C39 bacteriocin processing	family C39 unassigned peptidases
MER0049855	sp000836	C39.UPW	AAY92391	Peptidase C39 family	family C39 unassigned peptidases
MER0445947	sp000704	C39.UPW	EFV63238	peptidase C39 family protein	family C39 unassigned peptidases
MER0446005	sp000193	C39.UPW	ZP_08267151	peptidase C39 family protein	family C39 unassigned peptidases
MER0026653	sp000839	C39.UPW	YP_001268150	peptidase C39, bacteriocin processing	family C39 unassigned peptidases
MER0049200	sp003934	C39.UPW	EAN71871	Peptidase C39, bacteriocin processing	family C39 unassigned peptidases
MER0050039	sp003885	C39.UPW	EAN51279	Peptidase C39, bacteriocin processing	family C39 unassigned peptidases
MER0055097	sp000836	C39.UPW	ABA74336	Peptidase C39, bacteriocin processing	family C39 unassigned peptidases
MER0055828	sp005069	C39.UPW	EAO66309	Peptidase C39, bacteriocin processing	family C39 unassigned peptidases
MER0076524	sp005421	C39.UPW	YP_001235694	peptidase C39, bacteriocin processing	family C39 unassigned peptidases
MER0077332	sp005129	C39.UPW	ABM59594	peptidase C39, bacteriocin processing	family C39 unassigned peptidases
MER0077407	sp005453	C39.UPW	ABM61519	peptidase C39, bacteriocin processing	family C39 unassigned peptidases
MER0088057	sp000839	C39.UPW	EAX20600	peptidase C39, bacteriocin processing	family C39 unassigned peptidases
MER0445982	sp016219	C39.UPW	YP_002796630	peptidase C39, bacteriocin processing	family C39 unassigned peptidases
MER0073653	sp007955	C39.UPW	EAT97345	peptidase family protein	family C39 unassigned peptidases
MER0048777	sp003329	C39.UPW	AAZ27831	peptidase, C39 family	family C39 unassigned peptidases
MER0445965	sp000704	C39.UPW	EGC58541	peptidase, C39 family	family C39 unassigned peptidases
MER0445994	sp000836	C39.UPW	AFJ55483	peptidase, C39 family	family C39 unassigned peptidases
MER0446057	sp000477	C39.UPW	YP_003516020	periplasmic C39-family peptidase	family C39 unassigned peptidases
MER0446061	sp011428	C39.UPW	ZP_01894104	predicted double-glycine peptidase	family C39 unassigned peptidases
MER0096944	sp016899	C39.UPW	CAP63260	putative bacteriocin processing protein, Peptidase C39 family	family C39 unassigned peptidases
MER0054766	sp019082	C39.UPW	YP_728228	putative double-glycine peptidase	family C39 unassigned peptidases
MER0445933	sp027151	C39.UPW	ZP_09711310	putative double-glycine peptidase	family C39 unassigned peptidases
MER0061549	sp005468	C39.UPW	ABE31923	Putative peptidase	family C39 unassigned peptidases
MER0244606	sp001864	C39.UPW	YP_004354425	putative periplasmic protein	family C39 unassigned peptidases
MER0445998	sp000836	C39.UPW	YP_002872281	putative periplasmic protein	family C39 unassigned peptidases
MER0069716	sp000702	C39.UPW	YP_005889301	unnamed protein product	family C39 unassigned peptidases
MER0183787	sp003283	C39.UPW	YP_005436856	unnamed protein product	family C39 unassigned peptidases
MER0281460	sp000703	C39.UPW	CBX21987	unnamed protein product	family C39 unassigned peptidases
MER0283908	sp027103	C39.UPW	YP_005090634	unnamed protein product	family C39 unassigned peptidases
MER0453126	sp011239	C40.002	ZP_01726127	gamma-D-glutamate-meso-diaminopimelate muropeptidase	murein peptidase LytF
MER0118346	sp000114	C40.002	ZP_01695575	NLP/P60	murein peptidase LytF
MER0232750	sp023125	C40.002	YP_004096049	NLP/P60 protein	murein peptidase LytF
MER0003805	sp000127	C40.002	O07532	YhdD protein	murein peptidase LytF
MER0022066	sp002603	C40.003	NP_691195	cell wall associated protein	murein peptidase lytE
MER0453336	sp027294	C40.003	ZP_09915977	cell wall associated protein	murein peptidase lytE
MER0453027	sp000118	C40.003	YP_003598183	endopeptidase	murein peptidase lytE
MER0002450	sp000127	C40.003	LYTE_BACSU	Phosphatase-associated protein	murein peptidase lytE
MER0138649	sp004529	C40.004	EDS23663	50S ribosomal protein L1	spr peptidase
MER0025427	sp001109	C40.004	YP_004188697	cell wall-associated hydrolase	spr peptidase
MER0058660	sp005398	C40.004	ABC27330	Cell wall-associated Hydrolase	spr peptidase
MER0376728	sp027252	C40.004	YP_006427783	cell wall-associated hydrolase	spr peptidase
MER0377815	sp024994	C40.004	ZP_08564572	cell wall-associated hydrolase	spr peptidase
MER0378047	sp027386	C40.004	YP_006258383	cell wall-associated hydrolase	spr peptidase
MER0452509	sp003892	C40.004	ZP_04613997	Cell wall-associated hydrolase	spr peptidase
MER0453054	sp027386	C40.004	AFD07262	cell wall-associated hydrolase, invasion-associated protein	spr peptidase
MER0089837	sp000025	C40.004	ZP_00135277	COG0791: Cell wall-associated hydrolases	spr peptidase
MER0452357	sp021017	C40.004	ZP_04535128	conserved hypothetical protein	spr peptidase
MER0452813	sp000148	C40.004	ZP_07807718	conserved hypothetical protein	spr peptidase
MER0011615	sp000329	C40.004	Q9RUQ7	endopeptidase-related protein	spr peptidase
MER0014682	sp000329	C40.004	Q9RTL1	endopeptidase-related protein	spr peptidase
MER0499853	sp003139	C40.004	YP_007548687	hypothetical protein	family C40 unassigned peptidases
MER0501534	sp033179	C40.004	YP_008107168	hypothetical protein	family C40 unassigned peptidases
MER0504270	sp002959	C40.004	YP_008488080	hypothetical protein	family C40 unassigned peptidases
MER0506624	sp028152	C40.004	YP_006282826	hypothetical protein	family C40 unassigned peptidases
MER0507900	sp033177	C40.004	YP_007872543	hypothetical protein	family C40 unassigned peptidases
MER0509271	sp074544	C40.004	YP_008522606	hypothetical protein	family C40 unassigned peptidases
MER0175387	sp005423	C40.004	ZP_01168506	hypothetical protein B14911_02744	spr peptidase
MER0173208	sp018859	C40.004	ZP_03300167	hypothetical protein BACDOR_01534	spr peptidase
MER0377147	sp019191	C40.004	ZP_03458508	hypothetical protein BACEGG_01283	spr peptidase
MER0172138	sp018976	C40.004	ZP_03307047	hypothetical protein BACFIN_01378	spr peptidase
MER0181060	sp018348	C40.004	ZP_03016628	hypothetical protein BACINT_04235	spr peptidase
MER0069369	sp011788	C40.004	ABV11757	hypothetical protein CKO_00603	spr peptidase
MER0138253	sp002847	C40.004	EEA16377	hypothetical protein ENTCAN_00196	spr peptidase
MER0175792	sp011161	C40.004	YP_001440273	hypothetical protein ESA_04257	spr peptidase
MER0222866	sp023460	C40.004	YP_003812994	hypothetical protein HDN1F_37890	spr peptidase
MER0452852	sp000123	C40.004	ZP_09353119	hypothetical protein HMPREF1015_02020	spr peptidase
MER0377313	sp020756	C40.004	EIY39405	hypothetical protein HMPREF1062_00473	spr peptidase
MER0377737	sp028181	C40.004	ZP_10375063	hypothetical protein HMPREF1068_01343	spr peptidase
MER0332512	sp020803	C40.004	EHB90574	hypothetical protein HMPREF9335_00264	spr peptidase
MER0376902	sp027346	C40.004	ZP_09641787	hypothetical protein HMPREF9449_00173	spr peptidase
MER0378194	sp024937	C40.004	ZP_08472822	hypothetical protein HMPREF9455_00988	spr peptidase
MER0152549	sp004529	C40.004	ZP_02477418	hypothetical protein HPS_01052	spr peptidase
MER0378311	sp027301	C40.004	ZP_09679700	hypothetical protein PDENDC454_27498	family C40 unassigned peptidases
MER0452637	sp020754	C40.004	ZP_03806115	hypothetical protein PROPEN_04515	spr peptidase
MER0162585	sp002138	C40.004	ZP_02961016	hypothetical protein PROSTU_03002	spr peptidase
MER0164592	sp018779	C40.004	ZP_03315628	hypothetical protein PROVRUST_02444	spr peptidase
MER0452458	sp002967	C40.004	ZP_04628283	hypothetical protein yberc0001_27150	spr peptidase
MER0452453	sp003892	C40.004	ZP_04613338	hypothetical protein yrohd0001_25930	spr peptidase
MER0004012	sp000464	C40.004	YD14_HAEIN	lipoprotein	family C40 unassigned peptidases
MER0040347	sp004989	C40.004	YP_050826	lipoprotein	spr peptidase
MER0196177	sp003125	C40.004	CBG89054	lipoprotein	spr peptidase
MER0244254	sp003719	C40.004	YP_004392027	lipoprotein	spr peptidase
MER0377316	sp027111	C40.004	ZP_09416867	lipoprotein	spr peptidase
MER0377612	sp002176	C40.004	ZP_08251832	lipoprotein	spr peptidase
MER0377714	sp020949	C40.004	ZP_03966338	lipoprotein	spr peptidase
MER0452322	sp027466	C40.004	ZP_09184761	lipoprotein	spr peptidase
MER0452684	sp027466	C40.004	ZP_09186058	lipoprotein	spr peptidase
MER0452791	sp020991	C40.004	YP_003094641	lipoprotein	spr peptidase
MER0166404	sp021600	C40.004	ZP_02194842	lipoprotein NlpC	spr peptidase
MER0166611	sp005415	C40.004	ZP_01064349	lipoprotein NlpC	spr peptidase
MER0173394	sp002882	C40.004	ZP_01869314	lipoprotein NlpC	spr peptidase
MER0452304	sp026665	C40.004	ZP_08067443	lipoprotein NlpC	spr peptidase
MER0452477	sp025049	C40.004	ZP_07889578	lipoprotein NlpC	spr peptidase
MER0452627	sp002176	C40.004	ZP_08251960	lipoprotein NlpC	spr peptidase
MER0452673	sp011220	C40.004	ZP_01812887	lipoprotein NlpC	spr peptidase
MER0452845	sp004017	C40.004	EIA76221	lipoprotein NlpC	spr peptidase
MER0452887	sp004017	C40.004	EIA94155	lipoprotein NlpC	spr peptidase
MER0033514	sp002263	C40.004	Q7N357	Lipoprotein spr	spr peptidase
MER0094911	sp000567	C40.004	YP_002237405	lipoprotein Spr	spr peptidase
MER0250646	sp001102	C40.004	YP_004566255	Lipoprotein spr	spr peptidase
MER0285768	sp000566	C40.004	EHT06805	lipoprotein spr	spr peptidase
MER0452360	sp020878	C40.004	ZP_08391080	lipoprotein spr	spr peptidase
MER0452416	sp023035	C40.004	ZP_06639536	lipoprotein spr	spr peptidase
MER0452421	sp023474	C40.004	YP_003931681	lipoprotein spr	spr peptidase
MER0452428	sp000272	C40.004	ZP_09336285	lipoprotein spr	spr peptidase
MER0452430	sp002857	C40.004	EFE10146	lipoprotein spr	spr peptidase
MER0452439	sp002847	C40.004	ZP_05968465	lipoprotein spr	spr peptidase
MER0452440	sp002860	C40.004	ZP_08498867	lipoprotein spr	spr peptidase
MER0452556	sp027399	C40.004	ZP_09365874	Lipoprotein spr	spr peptidase
MER0452831	sp026665	C40.004	ZP_08067641	lipoprotein spr	spr peptidase
MER0202068	sp000399	C40.004	CBA21473	Lipoprotein spr precursor	spr peptidase
MER0378163	sp002289	C40.004	ADM42179	Lipoprotein spr precursor	spr peptidase
MER0452495	sp002921	C40.004	CAY73800	Lipoprotein spr precursor	spr peptidase
MER0071593	sp003934	C40.004	YP_564685	lipoprotein, NLP/P60 family	spr peptidase
MER0145108	sp018759	C40.004	ACJ26945	Lipoprotein, NLP/P60 family	spr peptidase
MER0203268	sp002126	C40.004	BAJ04272	lipoprotein, NLP/P60 family	spr peptidase
MER0116936	sp003982	C40.004	YP_573347	NLP/P60	spr peptidase
MER0378293	sp000238	C40.004	ZP_09503158	NLP/P60	spr peptidase
MER0452973	sp003959	C40.004	YP_605018	NLP/P60	spr peptidase
MER0022365	sp002608	C40.004	NP_715703	NLP/P60 family lipoprotein	spr peptidase
MER0094207	sp005743	C40.004	YP_693761	NLP/P60 family protein	spr peptidase
MER0452680	sp025049	C40.004	ZP_07889373	NLP/P60 family protein	spr peptidase
MER0453214	sp027298	C40.004	ZP_09079769	NLP/P60 family protein	spr peptidase
MER0453229	sp027298	C40.004	ZP_09080180	NLP/P60 family protein	spr peptidase
MER0041758	sp001141	C40.004	ACC88375	NLP/P60 protein	spr peptidase
MER0074366	sp007592	C40.004	Q0HP75	NLP/P60 protein	spr peptidase
MER0074431	sp002019	C40.004	Q0I0P0	NLP/P60 protein	spr peptidase
MER0075009	sp005214	C40.004	ABM02799	NLP/P60 protein	spr peptidase
MER0076157	sp005218	C40.004	ABM26828	NLP/P60 protein	spr peptidase
MER0094117	sp007979	C40.004	A0KR89	NLP/P60 protein	spr peptidase
MER0094136	sp010771	C40.004	YP_001504045	NLP/P60 protein	spr peptidase
MER0094137	sp011099	C40.004	YP_001178608	NLP/P60 protein	spr peptidase
MER0094192	sp003933	C40.004	YP_001052630	NLP/P60 protein	spr peptidase
MER0095439	sp011099	C40.004	YP_001177487	NLP/P60 protein	spr peptidase
MER0096801	sp003081	C40.004	ADV56562	NLP/P60 protein	spr peptidase
MER0115580	sp015059	C40.004	ABZ74628	NLP/P60 protein	spr peptidase
MER0122850	sp011431	C40.004	ABV39067	NLP/P60 protein	spr peptidase
MER0123719	sp016909	C40.004	ACD66461	NLP/P60 protein	spr peptidase
MER0129276	sp018428	C40.004	YP_003090458	NLP/P60 protein	spr peptidase
MER0140187	sp001045	C40.004	EDY14455	NLP/P60 protein	spr peptidase
MER0174206	sp020022	C40.004	ACN98647	NLP/P60 protein	spr peptidase
MER0182681	sp020799	C40.004	ACS86119	NLP/P60 protein	spr peptidase
MER0185537	sp020803	C40.004	EGY31280	NLP/P60 protein	spr peptidase
MER0193383	sp020799	C40.004	ACZ77222	NLP/P60 protein	spr peptidase
MER0197627	sp022143	C40.004	ADC57378	NLP/P60 protein	spr peptidase
MER0224540	sp023486	C40.004	YP_003913445	NLP/P60 protein	spr peptidase
MER0232014	sp022132	C40.004	YP_004116515	NLP/P60 protein	spr peptidase
MER0235090	sp023788	C40.004	YP_004161078	NLP/P60 protein	spr peptidase
MER0236312	sp023794	C40.004	YP_004171541	NLP/P60 protein	spr peptidase
MER0236689	sp023603	C40.004	EFQ74605	NLP/P60 protein	spr peptidase
MER0237123	sp023821	C40.004	YP_004211514	NLP/P60 protein	spr peptidase
MER0239758	sp023727	C40.004	YP_004275480	NLP/P60 protein	spr peptidase
MER0240117	sp023895	C40.004	YP_004256422	NLP/P60 protein	spr peptidase
MER0240840	sp023905	C40.004	YP_004238037	NLP/P60 protein	spr peptidase
MER0240920	sp023900	C40.004	YP_004257751	NLP/P60 protein	spr peptidase
MER0248609	sp024536	C40.004	YP_004501803	NLP/P60 protein	spr peptidase
MER0248630	sp027185	C40.004	YP_004506755	NLP/P60 protein	spr peptidase
MER0252175	sp003194	C40.004	YP_004588174	NLP/P60 protein	spr peptidase
MER0273837	sp002858	C40.004	YP_004829452	NLP/P60 protein	spr peptidase
MER0376497	sp028096	C40.004	ZP_10328160	NLP/P60 protein	spr peptidase
MER0377692	sp025010	C40.004	ZP_08636316	NLP/P60 protein	spr peptidase
MER0377722	sp027459	C40.004	ZP_09289123	NLP/P60 protein	spr peptidase
MER0377916	sp027449	C40.004	ZP_09506572	NLP/P60 protein	spr peptidase
MER0452329	sp027385	C40.004	ZP_09630434	NLP/P60 protein	spr peptidase
MER0452352	sp027167	C40.004	ZP_09016045	NLP/P60 protein	spr peptidase
MER0452386	sp000381	C40.004	YP_003941073	NLP/P60 protein	spr peptidase
MER0452415	sp023581	C40.004	ZP_07379376	NLP/P60 protein	spr peptidase
MER0452442	sp026613	C40.004	YP_006026218	NLP/P60 protein	spr peptidase
MER0452478	sp003537	C40.004	YP_003017223	NLP/P60 protein	spr peptidase
MER0452567	sp021644	C40.004	YP_005400534	NLP/P60 protein	spr peptidase
MER0452759	sp020876	C40.004	YP_003989426	NLP/P60 protein	spr peptidase
MER0452830	sp023398	C40.004	YP_003654608	NLP/P60 protein	spr peptidase
MER0452834	sp017018	C40.004	YP_002885715	NLP/P60 protein	spr peptidase
MER0453055	sp023531	C40.004	ZP_07388984	NLP/P60 protein	spr peptidase
MER0094178	sp003929	C40.004	Q07VZ7	NLP/P60 protein precursor	spr peptidase
MER0069480	sp001104	C40.004	ACH65609	NlpC	spr peptidase
MER0074205	sp000029	C40.004	ABK36176	NlpC	spr peptidase
MER0074275	sp000029	C40.004	ABK39327	NlpC	spr peptidase
MER0193049	sp000024	C40.004	EHK90194	NlpC	spr peptidase
MER0193071	sp000024	C40.004	ACX82745	NlpC	spr peptidase
MER0013797	sp001103	C40.004	EGR07240	nlpC/P60 family protein	spr peptidase
MER0115111	sp005165	C40.004	ACD06987	NlpC/P60 family protein	spr peptidase
MER0376859	sp023692	C40.004	EIF38447	NlpC/P60 family protein	spr peptidase
MER0377054	sp025038	C40.004	ZP_08297571	NlpC/P60 family protein	spr peptidase
MER0377068	sp024952	C40.004	ZP_08755291	NlpC/P60 family protein	spr peptidase
MER0377146	sp027429	C40.004	ZP_10126767	NlpC/P60 family protein	spr peptidase
MER0377775	sp027429	C40.004	ZP_10125686	NlpC/P60 family protein	spr peptidase
MER0452450	sp004417	C40.004	YP_002933992	NlpC/P60 family protein	spr peptidase
MER0452475	sp024090	C40.004	ZP_07949782	NlpC/P60 family protein	spr peptidase
MER0452493	sp003309	C40.004	ZP_09390868	NlpC/P60 family protein	spr peptidase
MER0452687	sp027465	C40.004	ZP_10074068	NlpC/P60 family protein	spr peptidase
MER0452870	sp020942	C40.004	ZP_07084602	NlpC/p60 family protein	spr peptidase
MER0057941	sp001926	C40.004	YP_005457141	outer membrane lipoprotein	spr peptidase
MER0163644	sp011161	C40.004	EGL72068	outer membrane lipoprotein	spr peptidase
MER0238271	sp018767	C40.004	YP_003040508	outer membrane lipoprotein	spr peptidase
MER0251965	sp000379	C40.004	YP_004594986	outer membrane lipoprotein	spr peptidase
MER0452358	sp027115	C40.004	ZP_09460487	outer membrane lipoprotein	spr peptidase
MER0452371	sp023401	C40.004	ZP_06547905	outer membrane lipoprotein	spr peptidase
MER0452414	sp027143	C40.004	ZP_09511033	outer membrane lipoprotein	spr peptidase
MER0452436	sp024089	C40.004	ZP_08255261	outer membrane lipoprotein	spr peptidase
MER0452457	sp027112	C40.004	ZP_09038702	outer membrane lipoprotein	spr peptidase
MER0452498	sp020871	C40.004	YP_003259304	outer membrane lipoprotein	spr peptidase
MER0173066	sp002648	C40.004	YP_002172259	possible lipoprotein	spr peptidase
MER0002444	sp000464	C40.004	E7A3Z5_HAEIF	predicted peptidase, outer membrane lipoprotein	spr peptidase
MER0120229	sp012336	C40.004	ZP_01914247	predicted peptidase, outer membrane lipoprotein	spr peptidase
MER0377973	sp002063	C40.004	EFT36835	probable lipoprotein	spr peptidase
MER0151285	sp005402	C40.004	CAV18680	probable lipoprotein NlpC	spr peptidase
MER0452367	sp022448	C40.004	ZP_09805443	putative endopeptidase Spr	spr peptidase
MER0452636	sp022448	C40.004	ZP_09807419	putative endopeptidase Spr	spr peptidase
MER0030582	sp001787	C40.004	NP_873894	putative lipoprotein	spr peptidase
MER0031304	sp001140	C40.004	AAS61557	putative lipoprotein	spr peptidase
MER0059036	sp003489	C40.004	ABB61080	putative lipoprotein	spr peptidase
MER0059295	sp005182	C40.004	YP_454632	putative lipoprotein	spr peptidase
MER0077713	sp001139	C40.004	CAL11523	putative lipoprotein	spr peptidase
MER0089818	sp000025	C40.004	ACE61033	putative lipoprotein	spr peptidase
MER0096510	sp016933	C40.004	YP_001907209	Putative lipoprotein	spr peptidase
MER0114559	sp000830	C40.004	CAR41891	putative lipoprotein	spr peptidase
MER0117976	sp012335	C40.004	EDM37537	putative lipoprotein	spr peptidase
MER0134038	sp018495	C40.004	CAQ79072	putative lipoprotein	spr peptidase
MER0177964	sp020005	C40.004	ZP_03611663	putative lipoprotein	spr peptidase
MER0254979	sp005127	C40.004	YP_004730862	putative lipoprotein	spr peptidase
MER0452587	sp024932	C40.004	ZP_08726059	putative lipoprotein	spr peptidase
MER0452628	sp000464	C40.004	YP_005827575	Putative lipoprotein	spr peptidase
MER0452630	sp000464	C40.004	YP_005829429	Putative lipoprotein	spr peptidase
MER0452670	sp020005	C40.004	ZP_04752245	putative lipoprotein	spr peptidase
MER0452698	sp024932	C40.004	EGT82532	putative lipoprotein	spr peptidase
MER0453211	sp020766	C40.004	ZP_09828320	putative lipoprotein	spr peptidase
MER0022214	sp000933	C40.004	EGK20884	putative lipoprotein nlpC	spr peptidase
MER0276676	sp024932	C40.004	EGT82740	Putative lipoprotein nlpC	spr peptidase
MER0377368	sp008865	C40.004	ZP_06156989	putative lipoprotein NlpC	spr peptidase
MER0452510	sp024932	C40.004	EGT74558	Putative lipoprotein nlpC	spr peptidase
MER0452564	sp024569	C40.004	ZP_08097842	putative lipoprotein NlpC	spr peptidase
MER0452677	sp005402	C40.004	EGU38412	putative lipoprotein NlpC	spr peptidase
MER0452686	sp024099	C40.004	ZP_08104056	putative lipoprotein NlpC	spr peptidase
MER0452821	sp021203	C40.004	ZP_01233621	putative lipoprotein NlpC	spr peptidase
MER0019680	sp000904	C40.004	NP_461158	putative lipoprotein, suppresses thermosensitivity of prc mutants at low osmolality	spr peptidase
MER0173682	sp018786	C40.004	ACO45853	putative NLP/P60	spr peptidase
MER0378268	sp024932	C40.004	EGT77886	putative nlp/p60	spr peptidase
MER0452562	sp024932	C40.004	EGT75469	putative nlp/p60	spr peptidase
MER0015874	sp001912	C40.004	CCF87121	putative outer membrane lipoprotein	spr peptidase
MER0161478	sp005162	C40.004	YP_001479470	putative outer membrane lipoprotein	spr peptidase
MER0220882	sp023349	C40.004	YP_003742387	putative outer membrane lipoprotein	spr peptidase
MER0245972	sp024428	C40.004	YP_004419052	putative outer membrane lipoprotein	spr peptidase
MER0378042	sp020800	C40.004	YP_003004751	putative outer membrane lipoprotein	spr peptidase
MER0452423	sp023035	C40.004	ZP_06191021	putative outer membrane lipoprotein	spr peptidase
MER0004035	sp000403	C40.004	SPR_ECOLI	putative peptidase, outer membrane lipoprotein	spr peptidase
MER0151160	sp002861	C40.004	CAQ89766	putative peptidase, outer membrane lipoprotein	spr peptidase
MER0202800	sp022649	C40.004	ADD77735	Rtn	spr peptidase
MER0305441	sp027422	C40.004	ZP_09897093	soluble lytic murein transglycosylase	spr peptidase
MER0377535	sp020766	C40.004	ZP_09829001	Spr family lipoprotein	spr peptidase
MER0282037	sp000381	C40.004	YP_004954137	spr gene product	spr peptidase
MER0282238	sp000381	C40.004	YP_004952936	spr gene product	spr peptidase
MER0376751	sp028121	C40.004	YP_006526436	spr gene product	spr peptidase
MER0040886	sp003540	C40.004	YP_088525-1	Spr protein	spr peptidase
MER0040887	sp003540	C40.004	YP_088280-1	Spr protein	spr peptidase
MER0452734	sp011429	C40.004	ZP_01900086	Spr protein	spr peptidase
MER0453505	sp000024	C40.004	EGY48159	Spr protein	spr peptidase
MER0097320	sp021644	C40.004	YP_005198850	unnamed protein product	family C40 unassigned peptidases
MER0142797	sp025022	C40.004	YP_005554787	unnamed protein product	family C40 unassigned peptidases
MER0146513	sp027210	C40.004	YP_005655207	unnamed protein product	family C40 unassigned peptidases
MER0452203	sp000118	C40.005	YP_003598984	cell wall hydrolase	PgdS peptidase
MER0179334	sp016099	C40.005	CBK97661	Cell wall-associated hydrolases	PgdS peptidase
MER0003986	sp000127	C40.005	PGDS_BACSU	gamma-D,L-glutamyl hydrolase	PgdS peptidase
MER0452171	sp000117	C40.005	ADI47123	gamma-D,L-glutamyl hydrolase	PgdS peptidase
MER0452190	sp000109	C40.005	ADX01223	gamma-D,L-glutamyl hydrolase	PgdS peptidase
MER0223925	sp000127	C40.005	YP_003867869	gamma-DL-glutamyl hydrolase	PgdS peptidase
MER0452168	sp023504	C40.005	YP_003975014	gamma-DL-glutamyl hydrolase	PgdS peptidase
MER0452174	sp000127	C40.005	YP_005558603	gamma-DL-glutamyl hydrolase	PgdS peptidase
MER0452179	sp000127	C40.005	EHA32364	gamma-DL-glutamyl hydrolase	PgdS peptidase
MER0452193	sp000109	C40.005	YP_005551672	gamma-DL-glutamyl hydrolase	PgdS peptidase
MER0170667	sp000109	C40.005	EHM07141	PgdS	PgdS peptidase
MER0452200	sp000109	C40.005	AFJ63786	putative lipoprotein	PgdS peptidase
MER0219616	sp011189	C40.006	YP_003774800	cell wall invasion-associated hydrolase	PgpA peptidase
MER0090348	sp005328	C40.006	ABO65757	Cell wall lytic activity	PgpA peptidase
MER0305302	sp027301	C40.006	ZP_09676859	cell wall lytic activity	PgpA peptidase
MER0135443	sp027211	C40.006	BAK79525	cell wall-associated hydrolase	PgpA peptidase
MER0145412	sp018760	C40.006	ACJ32685	Cell wall-associated hydrolase	PgpA peptidase
MER0274724	sp024885	C40.006	YP_004856813	cell wall-associated hydrolase	PgpA peptidase
MER0285412	sp003708	C40.006	AEV17832	Cell wall-associated hydrolase	PgpA peptidase
MER0377088	sp020793	C40.006	ZP_04576050	cell wall-associated hydrolase	PgpA peptidase
MER0377112	sp025087	C40.006	ZP_08419965	cell wall-associated hydrolase	PgpA peptidase
MER0377798	sp002110	C40.006	YP_006430635	cell wall-associated hydrolase	PgpA peptidase
MER0452278	sp024075	C40.006	BAK17724	cell wall-associated hydrolase	PgpA peptidase
MER0452575	sp000122	C40.006	YP_005957743	cell wall-associated hydrolase	PgpA peptidase
MER0058013	sp005391	C40.006	YP_356788	Cell wall-associated hydrolase -like	PgpA peptidase
MER0169306	sp005470	C40.006	YP_002098031	Cell wall-associated hydrolase -like	PgpA peptidase
MER0376515	sp028214	C40.006	ZP_10676788	cell wall-associated hydrolase, invasion-associated protein	PgpA peptidase
MER0376529	sp028214	C40.006	ZP_10675627	cell wall-associated hydrolase, invasion-associated protein	PgpA peptidase
MER0376552	sp011623	C40.006	ZP_10669802	cell wall-associated hydrolase, invasion-associated protein	PgpA peptidase
MER0376736	sp024039	C40.006	ZP_08179171	cell wall-associated hydrolase, invasion-associated protein	PgpA peptidase
MER0376791	sp027901	C40.006	YP_005148281	cell wall-associated hydrolase, invasion-associated protein	PgpA peptidase
MER0376851	sp027304	C40.006	YP_006466040	cell wall-associated hydrolase, invasion-associated protein	PgpA peptidase
MER0376853	sp027304	C40.006	YP_006467374	cell wall-associated hydrolase, invasion-associated protein	PgpA peptidase
MER0376944	sp027302	C40.006	ZP_09656878	cell wall-associated hydrolase, invasion-associated protein	PgpA peptidase
MER0377019	sp027302	C40.006	ZP_09653163	cell wall-associated hydrolase, invasion-associated protein	PgpA peptidase
MER0377125	sp023362	C40.006	ZP_10035930	cell wall-associated hydrolase, invasion-associated protein	PgpA peptidase
MER0377264	sp011623	C40.006	ZP_10667880	cell wall-associated hydrolase, invasion-associated protein	PgpA peptidase
MER0377321	sp027302	C40.006	ZP_09654805	cell wall-associated hydrolase, invasion-associated protein	PgpA peptidase
MER0377438	sp028214	C40.006	ZP_10676787	cell wall-associated hydrolase, invasion-associated protein	PgpA peptidase
MER0378269	sp027304	C40.006	YP_006466510	cell wall-associated hydrolase, invasion-associated protein	PgpA peptidase
MER0452347	sp027901	C40.006	YP_005148506	cell wall-associated hydrolase, invasion-associated protein	PgpA peptidase
MER0078451	sp004357	C40.006	ABM95474	cell wall-associated hydrolase-like protein	PgpA peptidase
MER0017473	sp000855	C40.006	CBJ38565	Cell wall-associated hydrolases	PgpA peptidase
MER0066755	sp003213	C40.006	CCE52785	Cell wall-associated hydrolases	PgpA peptidase
MER0305509	sp023754	C40.006	CBL06826	Cell wall-associated hydrolases	PgpA peptidase
MER0056698	sp005388	C40.006	YP_379100	Cell wall-associated hydrolases -like	PgpA peptidase
MER0376977	sp003650	C40.006	YP_003971549	cell wall-associated protein	PgpA peptidase
MER0305305	sp022671	C40.006	ZP_05734954	chitinase 3	PgpA peptidase
MER0019549	sp002535	C40.006	Q8PIZ0	conserved hypothetical protein	PgpA peptidase
MER0093939	sp005330	C40.006	CAL61338	conserved hypothetical protein	PgpA peptidase
MER0116766	sp000343	C40.006	ABQ13347	conserved hypothetical protein	PgpA peptidase
MER0144288	sp011435	C40.006	BAF73291	conserved hypothetical protein	PgpA peptidase
MER0377824	sp026612	C40.006	ZP_07963551	conserved hypothetical protein	PgpA peptidase
MER0165570	sp016899	C40.006	YP_002005952	conserved hypothetical protein, NlpC/P60 domain ; putative transmembrane protein	PgpA peptidase
MER0118506	sp005700	C40.006	CAK14252	conserved hypothetical protein; NLP/P60 family protein	PgpA peptidase
MER0125828	sp005700	C40.006	CAK13281	conserved hypothetical protein; NLP/P60 family protein	PgpA peptidase
MER0203420	sp000118	C40.006	ADE69986	endopeptidase	PgpA peptidase
MER0203459	sp000118	C40.006	ADE71005	Endopeptidase	PgpA peptidase
MER0234122	sp022944	C40.006	EFF66081	endopeptidase	PgpA peptidase
MER0305455	sp026671	C40.006	ZP_08501642	endopeptidase	PgpA peptidase
MER0376952	sp024985	C40.006	ZP_08678070	endopeptidase	PgpA peptidase
MER0376911	sp023360	C40.006	ZP_07050929	endopeptidase lytE precursor	PgpA peptidase
MER0452616	sp024493	C40.006	ZP_08283822	endopeptidase LytF	PgpA peptidase
MER0305560	sp000931	C40.006	EFV83540	exported protein	PgpA peptidase
MER0094126	sp003434	C40.006	BAG43946	family C40 unassigned peptidase	PgpA peptidase
MER0376584	sp000854	C40.006	YP_004685993	hydrolase	PgpA peptidase
MER0024005	sp002714	C40.006	ZP_00079860	hypothetical protein	PgpA peptidase
MER0024493	sp001779	C40.006	ZP_00126349	hypothetical protein	PgpA peptidase
MER0024540	sp003885	C40.006	YP_584120	hypothetical protein	PgpA peptidase
MER0029589	sp020763	C40.006	YP_008638646	hypothetical protein	family C40 unassigned peptidases
MER0030002	sp020763	C40.006	YP_008638647	hypothetical protein	family C40 unassigned peptidases
MER0033695	sp002917	C40.006	Q7NTT7	Hypothetical protein	PgpA peptidase
MER0039627	sp018667	C40.006	Q5P189	Hypothetical protein	PgpA peptidase
MER0066033	sp018420	C40.006	GEBA2500655304	hypothetical protein	PgpA peptidase
MER0069811	sp018438	C40.006	GEBA2500591141	hypothetical protein	PgpA peptidase
MER0078085	sp003793	C40.006	YP_008596429	hypothetical protein	family C40 unassigned peptidases
MER0078702	sp003793	C40.006	YP_008596557	hypothetical protein	family C40 unassigned peptidases
MER0091225	sp017013	C40.006	BAG30173	hypothetical protein	PgpA peptidase
MER0133582	sp018433	C40.006	GEBA2500691248	hypothetical protein	PgpA peptidase
MER0230040	sp011101	C40.006	CBA16927	hypothetical protein	PgpA peptidase
MER0495615	sp030614	C40.006	YP_008837176	hypothetical protein	PgpA peptidase
MER0495777	sp057339	C40.006	YP_008761258	hypothetical protein	PgpA peptidase
MER0496170	sp057339	C40.006	YP_008762141	hypothetical protein	family C40 unassigned peptidases
MER0496211	sp057339	C40.006	YP_008762142	hypothetical protein	PgpA peptidase
MER0498231	sp034471	C40.006	YP_008608877	hypothetical protein	PgpA peptidase
MER0501102	sp002111	C40.006	YP_008591052	hypothetical protein	family C40 unassigned peptidases
MER0501428	sp029344	C40.006	YP_007941031	hypothetical protein	PgpA peptidase
MER0501658	sp030784	C40.006	YP_008673658	hypothetical protein	PgpA peptidase
MER0503606	sp873456	C40.006	YP_008802145	hypothetical protein	PgpA peptidase
MER0503612	sp873456	C40.006	YP_008802311	hypothetical protein	PgpA peptidase
MER0503638	sp033560	C40.006	YP_008416353	hypothetical protein	PgpA peptidase
MER0505285	sp033783	C40.006	YP_008953261	hypothetical protein	family C40 unassigned peptidases
MER0505286	sp033783	C40.006	YP_008953262	hypothetical protein	PgpA peptidase
MER0505396	sp033783	C40.006	YP_008957135	hypothetical protein	PgpA peptidase
MER0505429	sp881176	C40.006	YP_008930220	hypothetical protein	PgpA peptidase
MER0505533	sp881176	C40.006	YP_008934179	hypothetical protein	PgpA peptidase
MER0505534	sp881176	C40.006	YP_008934180	hypothetical protein	family C40 unassigned peptidases
MER0506121	sp024056	C40.006	YP_007659026	hypothetical protein	PgpA peptidase
MER0506122	sp024056	C40.006	YP_007659027	hypothetical protein	family C40 unassigned peptidases
MER0506233	sp002871	C40.006	YP_008102154	hypothetical protein	family C40 unassigned peptidases
MER0506234	sp002871	C40.006	YP_008102155	hypothetical protein	PgpA peptidase
MER0506459	sp030290	C40.006	YP_008001767	hypothetical protein	PgpA peptidase
MER0506460	sp030290	C40.006	YP_008001768	hypothetical protein	family C40 unassigned peptidases
MER0506896	sp881176	C40.006	YP_008935440	hypothetical protein	PgpA peptidase
MER0177883	sp005423	C40.006	ZP_01171473	hypothetical protein B14911_10272	PgpA peptidase
MER0140400	sp003021	C40.006	ZP_02037867	hypothetical protein BACCAP_03486	PgpA peptidase
MER0453166	sp020001	C40.006	ZP_03644729	hypothetical protein BACCOPRO_03119	PgpA peptidase
MER0378078	sp003663	C40.006	ZP_08640623	hypothetical protein BRLA_c18360	PgpA peptidase
MER0376653	sp027844	C40.006	ZP_10504952	hypothetical protein CAAU_0202	PgpA peptidase
MER0159798	sp015085	C40.006	ZP_02210290	hypothetical protein CLOBAR_02698	PgpA peptidase
[truncated: 52,447 more rows]
