# Supplementary material for: Distributions of Extracellular Peptidases Across Prokaryotic Genomes Reflect Phylogeny and Habitat
Source: Front Microbiol. 2019 Mar 5;10:413. doi: 10.3389/fmicb.2019.00413 (PMC6411800; doi:10.3389/fmicb.2019.00413)
Supplement: Supplementary file 6 [file Data_Sheet_6.ZIP]

Archive with 7 entries (6 files):
- arc147complete_16S.tree.tree
- __MACOSX/
- __MACOSX/._arc147complete_16S.tree.tree
- bac2191complete_16S.tree
- __MACOSX/._bac2191complete_16S.tree
- sigp_peptidase_sequences_prokaryotes.fasta
- __MACOSX/._sigp_peptidase_sequences_prokaryotes.fasta
