# Supplementary material for: Distributions of Extracellular Peptidases Across Prokaryotic Genomes Reflect Phylogeny and Habitat
Source: Front Microbiol. 2019 Mar 5;10:413. doi: 10.3389/fmicb.2019.00413 (PMC6411800; doi:10.3389/fmicb.2019.00413)
Supplement: Supplementary file 6 [file Data_Sheet_6.ZIP › arc147complete_16S.tree.tree]

(AP006878-2:0.00090,(AF479014-1:0.00055,CP002952-1:0.00166)0.959:0.00250,((AF350369-1:0.00054,CP002920-1:0.00838)0.962:0.00416,((AY099172-1:0.01140,(((CP002779-1:0.00055,(CP003534-2:0.00224,(CP002670-6:0.00137,(HE613800-2:0.00055,D45214-1-1:0.00599)0.997:0.00054)0.978:0.00680)0.795:0.00113)0.779:0.00096,U20163-1-1:0.00513)0.994:0.01004,((((X05567-1-1:0.01275,(CP005290-6:0.02983,Y10011-1-1:0.00999)0.991:0.01415)0.971:0.01283,(AJ299219-1:0.01608,AF220166-1:0.00919)0.641:0.00607)1.000:0.08350,(((((AP011786-8:0.17970,((X14835-987:0.01291,CP006646-5:0.00988)1.000:0.03792,((EF552404-1:0.09335,(((CP002535-1:0.03198,(AHKJ010001:0.00781,(D85508-498:0.01108,CP002656-4:0.01815)0.990:0.01665)1.000:0.04490)0.998:0.02753,((X90478-1-1:0.00164,CP002426-1:0.00055)1.000:0.04885,(LPSG010000:0.09468,AB022438-3:0.02775)0.871:0.02280)0.426:0.01018)1.000:0.06358,((DQ060321-1:0.04113,(((D83259-1-1:0.00667,AB109559-1:0.00260)0.999:0.03096,(AB087499-1:0.08244,AY350586-1:0.03096)1.000:0.02823)0.978:0.01563,CP000493-1:0.01716)0.952:0.00876)0.577:0.00540,((AJ012645-1:0.00096,X99560-1-1:0.00462)0.960:0.00875,(CP003531-4:0.02497,(X99556-1-1:0.02146,(HG796148-1:0.00368,(AY264344-1:0.02668,EU167539-1:0.00537)0.992:0.00957)0.995:0.01599)0.973:0.01169)0.816:0.00535)0.991:0.01487)0.923:0.01130)0.084:0.00707)0.995:0.02567,(AB013926-1:0.04724,((AB063630-1:0.00162,CP002529-1:0.00597)0.935:0.00933,((AY538162-1:0.00960,CP002590-1:0.00319)0.993:0.01323,(AB078332-1:0.00638,(CP003098-1:0.00310,(CP001014-6:0.00641,(AB029339-1:0.00464,AJ277124-3:0.00211)0.977:0.00769)0.898:0.00417)0.909:0.00296)0.995:0.01377)1.000:0.03644)0.672:0.00770)1.000:0.04198)0.772:0.01508)0.995:0.03295)0.759:0.01843,(GU797786-1:0.04862,(BD250982-2:0.02931,(HQ331116-1:0.01497,(DQ085097-1:0.00343,CP003843-9:0.00282)0.985:0.01092)0.971:0.02068)1.000:0.12442)1.000:0.14415)0.817:0.02432,CP000968-1:0.18222)1.000:0.06477,((DQ848677-1:0.34710,(((((DQ344973-1:0.04725,((AB771431-1:0.04095,(CP002988-2:0.08494,U17365-1-1:0.07201)0.370:0.01888)0.801:0.01655,((AB663374-1:0.00064,(KF668254-1:0.01029,(AB074566-1:0.00316,AB663376-1:0.00084)0.930:0.00239)0.764:0.00054)1.000:0.03309,(AY676200-1:0.06669,(AB477980-1:0.01470,KJ875352-1:0.01642)0.988:0.02169)0.980:0.01900)0.863:0.01445)0.975:0.02314)0.713:0.01383,(AB477223-1:0.04873,((((DQ874620-1:0.00292,(AY277583-1:0.00322,AJ002947-1:0.01242)0.806:0.00114)0.393:0.00671,(HM210308-1:0.01206,(AJ004806-1:0.01255,KT459383-1:0.00328)0.999:0.01976)0.863:0.01025)0.411:0.01267,AB477974-1:0.02261)0.546:0.00953,(D87970-1-1:0.02650,(AY277582-1:0.01964,(AB663468-1:0.00381,(HQ658996-1:0.01673,AB477228-1:0.03571)0.799:0.00732)0.996:0.01928)0.402:0.00665)0.976:0.01542)0.996:0.02688)0.705:0.01129)0.880:0.01709,((EF127229-1:0.00514,AB663400-1:0.00412)1.000:0.04504,((D87971-1-1:0.00920,AB576127-1:0.01292)1.000:0.04393,(D50850-1-1:0.08371,(KM008712-1:0.00646,(LN649963-1:0.00393,KP726288-1:0.06550)1.000:0.04434)0.954:0.03321)0.964:0.02384)0.419:0.01404)0.527:0.00996)0.417:0.01420,(JQ015378-1:0.02844,CP007060-1:0.01236)0.978:0.02646)1.000:0.15397,((((((AB162774-1:0.02260,JQ346747-1:0.07453)0.587:0.00941,(DQ282124-1:0.01569,AB479390-1:0.02136)1.000:0.02736)0.566:0.00532,EU156000-1:0.02765)0.979:0.01465,(AY260436-1:0.12362,Y16428-1-1:0.03781)0.865:0.00955)0.404:0.00305,((AB065298-1:0.01452,M59134-1-1:0.01405)0.999:0.02195,(AHKP010000:0.02211,U76631-1-1:0.03017)1.000:0.03154)0.679:0.00579)1.000:0.07233,((AM114193-2:0.01902,(AB196288-1:0.02878,CP003243-5:0.01881)1.000:0.03063)1.000:0.09347,(((FJ224366-1:0.01729,FR733675-1:0.04711)0.952:0.01504,((((AJ002476-1:0.00202,(JJRB010000:0.00914,M59137-1-1:0.00970)0.524:0.00608)1.000:0.04058,CP003083-1:0.02259)0.913:0.00874,AF120163-1:0.02111)0.570:0.00981,(X65537-1-1:0.02722,CP001994-5:0.02561)0.851:0.00842)0.202:0.00610)1.000:0.04488,(AY817738-1:0.03327,CP002565-2:0.05447)0.991:0.02658)1.000:0.04614)0.849:0.01916)1.000:0.06496)0.987:0.04670)0.965:0.04423,(M59932-1-1:0.10959,(CP002278-2:0.03244,((JQ346751-1:0.00532,X15364-164:0.00350)0.966:0.01295,(((M59139-1-1:0.05790,(DQ150253-1:0.02397,(LK054631-1:0.03262,CP004050-4:0.03578)0.944:0.01572)1.000:0.02575)0.989:0.01917,CP002772-8:0.01102)0.372:0.00369,HQ110085-1:0.01763)1.000:0.03746)1.000:0.06058)0.991:0.03773)0.880:0.02414)0.096:0.00531)0.261:0.01387,(((AHCG010000:0.17586,KJ522703-1:0.17364)0.994:0.07852,(((AJ299215-1:0.01401,M38637-979:0.00470)1.000:0.04594,(AE017261-4:0.03602,CP004145-7:0.07329)0.998:0.03165)1.000:0.11854,(ABSD010000:0.01285,CP003168-1:0.01355)0.985:0.03138)0.391:0.03068)1.000:0.09009,((AF025822-1:0.02024,(CP001901-9:0.00055,(AF051404-1:0.01540,(AB603516-1:0.00134,AF056938-1:0.00679)0.777:0.00053)0.962:0.00327)0.951:0.00822)0.981:0.01997,(CP002737-1:0.00277,(JQ346753-1:0.03518,U39016-1-1:0.03422)1.000:0.07238)1.000:0.03677)1.000:0.04588)0.984:0.02567)0.935:0.01515)1.000:0.05856,(HG942392-1:0.00117,AJ238992-1:0.00929)0.951:0.00981)0.795:0.00558)0.633:0.00380)0.923:0.00512,DQ167232-1:0.00390)0.849:0.00053)0.863:0.00088);
