# Supplementary material for: Distributions of Extracellular Peptidases Across Prokaryotic Genomes Reflect Phylogeny and Habitat
Source: Front Microbiol. 2019 Mar 5;10:413. doi: 10.3389/fmicb.2019.00413 (PMC6411800; doi:10.3389/fmicb.2019.00413)
Supplement: Supplementary file 6 [file Data_Sheet_6.ZIP › bac2191complete_16S.tree]

(((JUZQ010001:0.0,LEES010001:0.0,LDQJ010000:0.0):0.00055,GQ406569-1:0.00236)0.820:0.00108,(KP318471-1:0.00527,(JUZP010002:0.00055,((((AB004750-1:0.00055,CP000653-2:0.00108)0.870:0.00054,(((((((LEAL010000:0.00107,HM003641-1:0.00317)0.876:0.00225,((((AC200763-8:0.01344,JQ293090-1:0.02466)0.991:0.01758,((AF548135-1:0.00449,(AY676877-1:0.04085,CP003546-1:0.00967)0.832:0.00313)0.982:0.00532,((((((AF549387-1:0.02182,((LCTK010000:0.00107,AY362905-1:0.00799)0.869:0.00210,(((AY362917-1:0.00448,AE016827-1:0.01066)0.934:0.00430,((JZXO010000:0.01387,AY362920-1:0.00583)0.950:0.00554,(DQ361040-1:0.00670,APBX010000:0.00936)0.694:0.00111)0.764:0.00113)0.850:0.00196,((((JSVZ010000:0.00378,(AY362900-1:0.00445,(FJ435958-1:0.01047,AY362899-1:0.00055)0.000:0.00055)0.911:0.00387)0.952:0.00621,AE017143-1:0.00521)0.833:0.00263,M75076-1-1:0.00309)0.849:0.00328,(JF506642-1:0.00671,DQ301920-1:0.00866)0.283:0.00260)0.908:0.00438)0.921:0.00328)0.774:0.00111)0.827:0.00305,AY362898-1:0.00700)0.969:0.00701,(AJ290754-1:0.00737,(AY365454-1:0.00570,(JUNA010000:0.00054,AY362884-1:0.01839)0.302:0.00156)0.736:0.00481)0.839:0.00312)0.749:0.00180,(JUQZ010000:0.00463,JVYT010000:0.00055)0.844:0.00471)0.854:0.00616,JPXO010000:0.02346)1.000:0.04422,(((JPWL010000:0.00053,(LKKG010000:0.00104,(AOBM010000:0.00107,AJ508765-1:0.00055)0.988:0.00523)0.766:0.00110)0.995:0.01671,(EU530640-1:0.04276,X92889-1-1:0.01981)0.502:0.00560)0.913:0.00897,(((HM771353-1:0.01838,((AFWD010000:0.00055,HG931089-1:0.00107)0.964:0.00615,(((AJSQ010001:0.00054,(JSFE010000:0.00108,(LOSK010000:0.00055,KM014018-1:0.00055)0.000:0.00055)0.793:0.00107)0.830:0.00109,((((AY530930-1:0.00417,(LK021130-7:0.00057,AB680328-1:0.00055)1.000:0.00058)0.919:0.00331,(AAZW010000:0.00298,((AAND010000:0.00108,(LNQX010000:0.00055,LN832971-1:0.00141)1.000:0.00079)0.947:0.00291,(X70643-1-1:0.01029,CVOI010000:0.00308)0.813:0.00676)0.956:0.00055)0.462:0.00312)0.970:0.00624,ABCH010000:0.00106)0.946:0.00412,(((LT221186-1:0.00210,((FJ906812-1:0.00618,(LJSL010000:0.00208,JN837684-1:0.01296)0.790:0.00106)0.806:0.00106,((JRWP010000:0.00055,JN871709-1:0.00054)0.897:0.00283,((KM041156-1:0.00055,CP009354-2:0.00058)0.714:0.00055,JXXR010000:0.00208)0.678:0.00057)0.000:0.00055)0.816:0.00108)0.893:0.00209,(LOSN010000:0.00107,(AAKK020000:0.00206,(CP003241-3:0.00055,(LOBT010000:0.00055,LORY010000:0.00208)0.000:0.00055)0.000:0.00055)0.817:0.00108)0.803:0.00109)0.985:0.00072,(ABGR010000:0.00054,AB297941-1:0.00412)0.639:0.00053)0.935:0.00094)0.784:0.00105)0.844:0.00253,(LBGJ010000:0.00112,(ADBD010000:0.00196,EU518401-1:0.03051)0.000:0.00055)1.000:0.01899)0.761:0.00269)0.965:0.01145)0.886:0.00509,((AB032014-1:0.0,AY147856-1:0.0):0.00268,(LNRC010000:0.00187,(KM041165-1:0.00339,(AB003191-1:0.00410,AMZO010000:0.00602)0.758:0.00123)0.945:0.00437)0.994:0.01026)0.867:0.00545)0.964:0.01167,(((CP000510-1:0.00370,CP004404-4:0.00670)1.000:0.04391,((((U85851-1-1:0.02202,((CP002339-1:0.01729,AY787042-1:0.01830)0.360:0.00502,ABST010000:0.01522)0.780:0.00448)0.798:0.00298,((AB247623-1:0.00055,(CP002526-3:0.00055,DQ784575-1:0.00107)0.000:0.00055)0.869:0.00258,(LK391684-1:0.00373,DQ007436-1:0.01524)0.861:0.00305)0.963:0.00740)1.000:0.03962,((JQED010000:0.02322,(LK391620-1:0.04225,KP339300-1:0.00629)0.994:0.02138)0.968:0.01296,(((AAPI010000:0.02031,((AAXY010000:0.00106,CP003735-6:0.00112)0.927:0.00619,(AY258116-1:0.01337,(KF976350-1:0.01246,HG813106-1:0.03404)0.178:0.00055)0.921:0.00577)1.000:0.03117)0.972:0.01246,(((((CZHF010000:0.00703,DQ768649-1:0.02194)0.988:0.01404,(((JVRY010000:0.01357,((BBSQ010000:0.00254,((((LQMV010000:0.0,JHQK010000:0.0):0.00210,(LBHY010000:0.00055,BBTP010000:0.00208)0.790:0.00106)0.953:0.00320,(BBUC010000:0.00626,((CVLE010000:0.00108,BBOS010001:0.00313)0.931:0.00312,(AJ007008-1:0.00053,(LN774610-1:0.00080,(HM209770-1:0.00260,JYCJ010000:0.00170)0.613:0.00210)1.000:0.00051)0.785:0.00111)0.790:0.00105)0.935:0.00322)0.415:0.00053,CR543861-1:0.00473)0.948:0.00542)1.000:0.02319,(((KF424828-1:0.00318,(CP006265-6:0.00055,KM438077-1:0.03800)0.000:0.00054)0.995:0.01274,(CP000713-7:0.00054,(AFHU010002:0.00055,HM212668-1:0.00055)0.918:0.00090)0.918:0.00612)0.998:0.01565,(ANIN010000:0.00709,LGSW010000:0.02115)0.789:0.00698)0.765:0.00595)0.491:0.00227)1.000:0.02705,(LVPD010000:0.02437,AY520560-1:0.04372)0.926:0.00858)0.872:0.00433,(((L40993-1-1:0.05129,(((AF406554-1:0.00549,CP000544-3:0.02140)0.728:0.00130,(HM038001-1:0.02810,(CP005963-1:0.01073,CP005990-1:0.00752)0.978:0.01053)0.987:0.01492)0.956:0.00704,((ARJH010000:0.00599,(AGBG010000:0.01095,AJ006530-1:0.01483)0.776:0.00702)0.737:0.00297,(ABSJ010000:0.05314,(AY079010-1:0.02036,(AF302081-1:0.00784,CP001905-4:0.00386)0.985:0.01566)0.638:0.00810)0.766:0.00866)0.914:0.00515)0.638:0.00615)0.849:0.00659,(((AAQJ020000:0.05718,HM208383-1:0.02521)0.947:0.01528,(((AJ294334-1:0.03565,(AF126548-1:0.00476,AF329082-1:0.00175)0.997:0.02318)0.999:0.03349,(CP005996-2:0.04240,(AF304196-1:0.01737,(EF495157-1:0.00862,(AJ414655-1:0.01113,X72777-1-1:0.01248)0.876:0.00581)0.563:0.00732)0.818:0.01005)0.913:0.01334)0.036:0.00291,((LOLZ010001:0.00877,(X97366-1-1:0.01548,(AY444740-1:0.00226,X73405-1-1:0.00532)0.767:0.00135)0.542:0.00205)0.989:0.02185,((EF153479-1:0.00054,(CP002872-4:0.00414,DQ295795-1:0.00111)0.796:0.00105)0.953:0.00587,(AUXB010000:0.00410,AY928396-1:0.00311)0.555:0.00055)1.000:0.08057)0.855:0.01715)0.427:0.00745)0.861:0.00629,(((HQ407269-1:0.04749,(AY363245-1:0.04589,((AE003849-1:0.00980,((JFAQ010002:0.00169,(((JX986954-1:0.00108,(JVUQ010002:0.00641,(AB271140-1:0.00406,LK391702-1:0.03086)0.907:0.00476)0.735:0.00111)0.684:0.00055,X95921-1-1:0.00214)0.000:0.00055,((((HQ670696-1:0.00971,(EF101972-1:0.00423,KU301895-1:0.00860)0.731:0.00055)0.773:0.00055,HQ875739-1:0.00325)0.692:0.00055,Y10761-1-1:0.00055)0.000:0.00055,AM039952-4:0.00055)0.000:0.00055)0.824:0.00153)0.848:0.00439,(LN613115-1:0.01243,(KM114961-1:0.00055,AB248365-1:0.00054)0.930:0.00609)0.333:0.00336)0.823:0.00343)0.993:0.01951,(AB091194-1:0.01186,((AB100608-1:0.00240,AM087226-1:0.00093)0.910:0.00536,(LVJS010000:0.00256,(FJ851443-1:0.00055,CP003470-4:0.00055)0.808:0.00070)0.762:0.00254)0.461:0.00825)0.993:0.01968)0.964:0.01595)0.903:0.00988)0.842:0.00540,((HM173632-1:0.03630,(LGVW010000:0.03538,M35014-1-1:0.01402)1.000:0.02734)0.455:0.00330,((((AB023405-1:0.01267,(LN680097-1:0.01799,KJ679874-1:0.00303)0.951:0.01259)1.000:0.04503,(JQ073806-1:0.13978,((((((AF170103-1:0.04817,((AJ290833-1:0.00392,AJ291826-1:0.00770)0.986:0.01419,((AJ290832-1:0.00054,(CP000108-1:0.01740,(Y18253-1-1:0.00743,CP001110-1:0.00223)0.741:0.00316)0.864:0.00457)0.381:0.00331,((AB054671-1:0.00559,EF560699-1:0.00163)0.223:0.00605,(M58468-1-1:0.00953,AM050131-1:0.01207)0.528:0.00740)0.872:0.00779)0.881:0.00746)0.990:0.02375)1.000:0.11144,(((((AB078046-1:0.02906,((AJ438173-1:0.02601,(AM490402-1:0.02240,(ABCM010000:0.00809,AJ438172-1:0.00239)0.993:0.01357)0.895:0.00666)0.638:0.00648,(KP326564-1:0.01790,CP002584-3:0.03519)0.964:0.01306)0.996:0.02899)0.999:0.03759,(((((Z35665-1-1:0.02293,CP005488-2:0.00718)1.000:0.07777,(AF493694-1:0.05803,(((EF426425-1:0.00384,AB680291-1:0.00055)0.765:0.00612,(LAVB010000:0.01332,(CP001673-4:0.01565,(KJ190183-1:0.00217,KM461977-1:0.02412)0.785:0.00808)0.924:0.00733)0.991:0.01756)0.967:0.01676,(M93152-1-1:0.05109,KC454305-1:0.03983)0.323:0.01694)0.967:0.02152)0.162:0.00702)0.877:0.01113,(((JQ178355-1:0.01562,KF254739-1:0.01272)1.000:0.03419,(((AAXX010000:0.01646,KJ635872-1:0.03375)0.962:0.01257,((((AKJZ010001:0.00110,JN637326-1:0.00330)0.899:0.00470,(AJ440988-1:0.00532,AKZQ010000:0.01514)0.571:0.00372)0.925:0.00635,JX657048-1:0.00987)0.936:0.00445,HM443872-1:0.00137)0.923:0.00622)0.556:0.00761,JN825736-1:0.01599)0.820:0.00412)0.962:0.01820,(((((AEXX010000:0.01573,AF543295-1:0.01078)0.998:0.02373,(CDOH010000:0.01279,(GU350453-1:0.00320,(AMEU010000:0.00513,(X67609-1-1:0.00055,(LC107329-1:0.00324,(AJZR010000:0.00413,AKFR010000:0.00110)0.784:0.00092)0.963:0.00808)0.387:0.00507)0.919:0.00661)0.994:0.01920)0.960:0.01613)0.998:0.02361,AJJU010000:0.02275)0.684:0.00928,KP860625-1:0.02243)0.892:0.00796,((AANC010000:0.02117,((AY163576-1:0.03637,((FP476056-1:0.01695,(EU000229-1:0.02729,CP002157-3:0.01607)0.540:0.00574)0.674:0.00690,(AY424899-1:0.02883,AF218782-1:0.01987)0.942:0.01221)0.998:0.02364)0.790:0.00645,AF170749-1:0.03251)0.864:0.00559)0.892:0.00733,((CU207366-1:0.03570,((((HM022743-1:0.03752,(((ABHI010000:0.00874,EU021217-1:0.01932)0.981:0.01106,CP002825-3:0.00434)0.947:0.00791,AB265181-1:0.01273)0.035:0.00685)0.867:0.01164,(M61002-1-1:0.01360,(DQ004686-1:0.00055,CP004349-1:0.00055)0.965:0.01352)1.000:0.02951)0.849:0.00727,(ABCO010000:0.02367,AB032509-1:0.01807)0.843:0.00911)0.881:0.00508,(AHHE020001:0.01787,(DQ003276-1:0.00202,CP002528-1:0.00212)0.998:0.01898)0.958:0.01049)0.782:0.00304)0.648:0.00461,((AJ440991-1:0.01938,(LN651154-1:0.01331,DQ007442-1:0.03618)0.700:0.00623)0.942:0.01073,DQ017065-1:0.03464)0.852:0.00653)0.915:0.00934)0.308:0.00386)0.796:0.00918)1.000:0.04503)0.583:0.00919,AB125062-1:0.05290)0.846:0.01547,((CP006772-5:0.07728,((CZBH010000:0.00674,AB600999-1:0.00807)0.994:0.02104,(AB554232-1:0.00336,(CZBZ010000:0.00655,(CAEG010000:0.00459,AB554233-1:0.00392)0.989:0.00907)0.841:0.00356)0.948:0.01200)0.998:0.03624)0.874:0.01911,(((AB547648-1:0.03831,AB547649-1:0.02169)1.000:0.06396,((AB510699-1:0.04264,((((AB490803-1:0.00665,(AB214328-1:0.00237,LT223636-1:0.00484)0.609:0.00507)0.949:0.00742,((AB050108-1:0.01356,(((CVOZ010000:0.00433,(AY608697-1:0.00322,(AY608696-1:0.00744,ACWI010000:0.02352)0.724:0.00383)0.937:0.00628)0.895:0.00289,GQ496623-1:0.00322)0.892:0.00321,CYZH010000:0.00486)0.978:0.00759)0.850:0.00246,HZ485081-1:0.00806)0.927:0.00448)0.944:0.00603,(((JN873344-1:0.01504,(AB200227-1:0.02273,AB490802-1:0.00908)0.765:0.00472)0.963:0.00976,(AB490801-1:0.00248,AB510708-1:0.00798)0.486:0.00282)0.876:0.00639,AB050107-1:0.01284)0.805:0.00439)0.762:0.00226,((((((AB331896-1:0.00805,AB331897-1:0.02123)0.992:0.02122,((((AB547692-1:0.03432,(HM000124-1:0.02460,AJ006457-1:0.02528)0.753:0.01276)0.904:0.01047,(DQ518919-1:0.02711,((((FJ577255-1:0.00156,FJ717335-1:0.00596)1.000:0.02750,AB547691-1:0.01385)0.329:0.00541,AY323522-1:0.02351)0.783:0.00637,(FJ825149-1:0.01595,CP003666-2:0.02742)0.589:0.01127)0.359:0.00385)0.951:0.01093)0.731:0.00178,(AB064923-1:0.01181,(((EF534314-1:0.02026,AB108826-1:0.01015)0.902:0.00550,(JN867229-1:0.00547,(AB200414-1:0.04046,(JN867296-1:0.02892,(AB547678-1:0.01554,(AB182483-1:0.02714,(JVYX010007:0.00174,AB547675-1:0.00054)1.000:0.03578)0.917:0.01476)0.936:0.01129)0.388:0.00673)0.967:0.01347)0.703:0.00786)0.881:0.00557,((((HZ486188-1:0.00306,(JN867235-1:0.00838,(HZ486209-1:0.01164,X73963-1-1:0.02278)0.265:0.00270)0.990:0.01512)0.958:0.01305,(JN867270-1:0.01526,AB547670-1:0.01201)0.964:0.01166)0.748:0.00779,AB547702-1:0.01194)0.573:0.00241,(JN867315-1:0.00208,(((AY836507-1:0.00244,AJIN010000:0.00563)0.594:0.00180,JN867245-1:0.00416)0.759:0.00055,ADCT010001:0.00113)0.904:0.00350)0.988:0.00951)0.892:0.00419)0.908:0.00407)0.935:0.00887)1.000:0.03222,(JQ039189-1:0.02776,AJ005634-1:0.06252)0.979:0.01829)0.966:0.01598)0.998:0.02994,AB253731-1:0.02952)0.979:0.01789,AB064919-1:0.01280)0.967:0.01258,(AB200217-1:0.01235,AB200223-1:0.01404)0.803:0.00969)0.669:0.01018,(AB050111-1:0.00399,AB242142-1:0.00636)0.999:0.02796)0.988:0.01820)0.862:0.00967)1.000:0.02836,((ACWX010000:0.03125,AB370251-1:0.04667)0.992:0.02716,((((AB547656-1:0.03716,(AB035456-1:0.03183,(AY253728-1:0.01923,(DJ349097-1:0.00055,AY570514-1:0.00055)1.000:0.06473)0.988:0.02790)0.870:0.00953)0.971:0.02007,(AJ319867-1:0.01129,AB548675-1:0.01008)0.999:0.02725)0.436:0.01082,(AB035460-1:0.02879,(HZ486111-1:0.01028,(CZAR010000:0.03042,(AB238928-1:0.00050,AB261128-1:0.00294)0.978:0.00940)0.953:0.01036)0.993:0.01751)0.911:0.00899)0.844:0.00646,(ADCM010000:0.05161,AB078842-1:0.01965)0.997:0.02690)0.860:0.00786)0.831:0.01220)0.968:0.02089)0.908:0.01574,(FN994992-1:0.01428,(AJ418048-1:0.01726,DQ517535-1:0.02010)0.330:0.00958)0.981:0.02566)0.975:0.02770)0.906:0.01703)0.574:0.01843)0.924:0.01292,(((AF078775-1:0.02734,(DQ244077-1:0.01651,EF592608-1:0.02756)0.953:0.01699)1.000:0.06547,(AB088636-1:0.06914,AJ784892-1:0.04125)0.968:0.02489)0.999:0.04000,((((AB506780-1:0.01431,HE983995-1:0.05888)1.000:0.06494,(AB078056-1:0.10438,((AY854022-1:0.03380,AY904352-1:0.05831)0.998:0.04001,((GQ141052-1:0.06041,(AY279982-1:0.02756,GQ355622-1:0.05085)0.985:0.03439)0.996:0.04316,(M62786-1-1:0.07228,JF496412-1:0.03550)0.890:0.01952)0.895:0.02424)0.878:0.02023)0.917:0.02004)0.353:0.00718,(AB078069-1:0.04247,(((((DQ645421-1:0.03775,AMZY020000:0.06388)0.308:0.01070,AJ575266-1:0.01879)0.898:0.01366,AAXU020000:0.03027)0.134:0.00868,AJ564642-1:0.01387)0.999:0.04308,AB078080-1:0.06527)0.588:0.01126)0.883:0.00950)0.944:0.01067,(JEME010028:0.08677,M58768-1-1:0.04664)0.970:0.02135)0.901:0.01224)0.789:0.01118)1.000:0.08181,(LN650024-1:0.08663,EU652068-1:0.03143)0.997:0.04221)0.853:0.00936,(AB478415-1:0.03210,CP003557-2:0.02741)1.000:0.05102)0.877:0.01159)0.461:0.00477,((ABBV010003:0.10813,(AMFJ010364:0.24550,CP006914-6:0.17964)0.627:0.07453)0.967:0.05491,(LUNM010001:0.12904,HG793133-5:0.12280)0.069:0.01839)0.911:0.01584)0.996:0.02777,(AJ430587-1:0.07121,(AB072735-1:0.09446,AB275484-1:0.13235)0.970:0.04657)0.880:0.01363)0.971:0.01257,(((((AY293856-1:0.09763,(AY714984-1:0.06048,((AY631878-1:0.00055,Z98589-1-1:0.00391)1.000:0.06105,((EF612284-1:0.00619,AY792329-1:0.00407)0.962:0.01344,(Z21634-1-1:0.00493,((LSSQ010000:0.00302,(Z21628-1-1:0.00054,Z21635-1-1:0.00719)0.551:0.00218)0.678:0.00224,((AY995713-1:0.00811,U12676-1-1:0.00207)0.879:0.00207,LSSR010000:0.00055)0.823:0.00199)0.991:0.01338)0.477:0.00318)0.936:0.01342)0.999:0.04185)0.985:0.03073)0.981:0.03244,((((AY369251-1:0.02242,(((Y16568-1-1:0.04479,(CP002631-1:0.09324,(M71238-1-1:0.07221,JQ783348-1:0.04438)0.556:0.01298)0.572:0.01229)0.972:0.01991,(CP002868-1:0.01950,(AF093251-1:0.01824,AF320287-1:0.02793)0.778:0.00808)0.997:0.02692)0.923:0.01298,(D85438-1-1:0.00656,EF061268-1:0.01657)0.996:0.02481)0.667:0.00899)0.965:0.02118,(CP002103-2:0.0,CP003902-2:0.0):0.03590)1.000:0.04967,((((U80597-1-1:0.03477,(AJ698092-1:0.03375,(AF357917-1:0.01674,(AF357916-1:0.00055,CP002541-1:0.00214)0.928:0.00792)0.988:0.02119)1.000:0.04015)0.122:0.00228,(GQ175067-1:0.00531,CP000049-4:0.00058)1.000:0.11302)0.631:0.01445,X62809-1-1:0.06289)0.418:0.01109,(X93928-1-1:0.03609,CP006939-3:0.03715)0.678:0.00520)0.927:0.01727)0.997:0.04856,((((DQ133256-1:0.00305,EF371457-1:0.00634)0.138:0.00121,AY312492-1:0.00336)0.893:0.00152,JXNS010001:0.00054)1.000:0.12707,CU466930-1:0.19679)0.713:0.01588)0.891:0.02000)1.000:0.03433,((((AB558169-1:0.01800,CP001739-1:0.03477)0.852:0.00833,(JQ087393-1:0.04836,(AB818949-1:0.00853,AB558170-1:0.00849)1.000:0.03743)0.102:0.00253)0.999:0.05122,(AJ307981-1:0.02133,((JAAF010000:0.00445,M58679-1-1:0.00303)0.940:0.00655,(((ACDC030000:0.00053,HM347058-1:0.00414)0.491:0.00108,(((AB639143-1:0.00072,CP012713-2:0.00092)0.998:0.00055,((ADEE020000:0.00055,GQ301042-1:0.00108)0.000:0.00055,CP007062-9:0.00055)0.000:0.00055)0.993:0.00796,(JAOZ010000:0.00236,(ACDE020000:0.00106,(CP003700-8:0.00310,AB540989-1:0.00209)0.788:0.00108)0.890:0.00284)0.322:0.00109)0.939:0.00411)0.992:0.01170,(AJ867032-1:0.00844,(M58686-1-1:0.00055,AJ867037-1:0.00055)0.969:0.00531)0.784:0.00146)0.552:0.00518)0.991:0.02275)0.986:0.02567)1.000:0.11096,((((AJ440237-1:0.05490,(((JQ511973-1:0.01850,(FN178464-1:0.00641,((FJ554832-1:0.02540,(LT223657-1:0.01370,(CYYF010000:0.02327,(AB031061-1:0.00216,AB031063-1:0.00337)0.986:0.01049)0.914:0.00658)0.915:0.00903)0.481:0.00943,((AB490806-1:0.02474,(HZ486404-3:0.01540,AB559823-1:0.01697)0.923:0.00910)0.773:0.00600,(AB019260-1:0.02841,(AB379693-1:0.02812,(AB306661-1:0.02693,((ACWN010000:0.00100,LC145578-1:0.00055)0.990:0.01760,HZ485698-1:0.01743)0.823:0.00789)0.098:0.00586)0.865:0.01606)0.883:0.01333)0.989:0.02915)1.000:0.05349)0.981:0.01805)0.957:0.01588,(HZ484999-5:0.01137,AB558168-1:0.00055)0.920:0.00955)1.000:0.07456,X87135-1-1:0.05707)0.453:0.00567)0.691:0.00668,((AB360346-1:0.06710,CP001631-1:0.03550)0.936:0.01148,((((Y08541-1-1:0.02209,((AJ316570-1:0.00059,(X92356-1-1:0.02672,EU181225-1:0.00647)0.742:0.00170)0.993:0.01342,((CP002801-2:0.00556,((CP000249-3:0.00421,(AJWA010000:0.00110,CT573213-5:0.00055)0.762:0.00111)0.774:0.00124,(CP000820-1:0.00225,CP002299-1:0.00516)0.942:0.00430)0.801:0.00168)0.783:0.00288,AJ007290-1:0.01582)0.895:0.00423)0.855:0.00654)0.825:0.00316,((((KF241148-1:0.01564,(((D89331-1-1:0.01264,(AB029087-1:0.00755,AY278626-1:0.01785)0.322:0.00863)0.897:0.01054,((JGZV010000:0.00949,((((AB006658-1:0.00394,CP000605-1:0.00858)0.980:0.01044,(D86183-1-1:0.00426,((D86182-1-1:0.00499,(D86187-1-1:0.00314,JF340474-1:0.00558)0.000:0.00055)0.998:0.00944,AF275881-1:0.00514)0.865:0.00241)0.912:0.00344)0.862:0.00419,(LSRC010000:0.02607,KJ412981-1:0.01123)0.899:0.00534)0.769:0.00230,(AB050137-1:0.01261,D86189-1-1:0.00784)0.989:0.01426)0.367:0.00271)0.773:0.00770,JWME010000:0.00924)0.964:0.02103)1.000:0.07244,((CYUL010000:0.02103,AJ234059-1:0.02449)0.897:0.00871,((((AJ540309-1:0.01599,(AJ243791-1:0.00409,(HM596281-1:0.00113,AJ234046-1:0.00055)0.830:0.00054)0.961:0.01136)0.769:0.01089,AJ249326-1:0.04564)0.880:0.00654,(AGWP010000:0.02851,(AJ318410-1:0.00064,AJ576047-1:0.00491)1.000:0.03354)0.957:0.01345)0.186:0.00298,(X78720-1-1:0.00991,(LLVT010000:0.00455,JWDO010001:0.00374)0.745:0.00120)0.991:0.01783)0.957:0.01198)0.726:0.01415)0.957:0.02116)0.171:0.00248,(((((AJ717351-1:0.01179,(AJKR010000:0.02691,AF251035-1:0.03365)0.880:0.00884)0.953:0.00856,(KF663871-1:0.01004,((LDRR010001:0.00054,JN700204-1:0.03128)0.999:0.01967,KR812390-1:0.01674)0.878:0.00358)0.851:0.00257)0.996:0.01257,(((Y18378-1-1:0.02036,((GU827555-1:0.00490,(KF318794-1:0.00151,JQ659579-1:0.00514)0.927:0.00579)0.851:0.00321,(FJ527726-1:0.00110,AF403541-1:0.01116)0.924:0.00698)0.574:0.00264)0.951:0.00592,X79450-1-1:0.00894)0.711:0.00109,((X78420-1-1:0.03034,(GQ339911-1:0.00110,(AB098579-1:0.00322,KM186613-1:0.01077)0.899:0.00537)0.982:0.01129)0.468:0.00332,(((EU147009-1:0.00236,JN592607-1:0.00055)0.883:0.00279,((AB089841-1:0.00053,(KF203122-1:0.00322,((CP003203-1:0.00054,HQ003443-1:0.02953)0.949:0.00410,(JWTB010000:0.00054,LN774762-1:0.00127)0.000:0.00054)0.895:0.00317)0.773:0.00113)0.954:0.00420,((LC125159-1:0.01828,AB023371-1:0.00355)0.960:0.00528,AFXQ010000:0.00420)0.918:0.00319)0.821:0.00176)0.877:0.00477,(CZJW010000:0.00962,(JQHE010000:0.00055,AB071952-1:0.00055)1.000:0.02314)0.958:0.00940)0.839:0.00405)0.888:0.00342)0.775:0.00229)0.834:0.00202,((JOIN010000:0.00390,AAMN010000:0.01319)0.849:0.00219,(D85486-1-1:0.00457,(AJ243919-1:0.00758,((AEIQ010000:0.00460,AFYF010000:0.01693)0.881:0.00597,AB550802-1:0.00802)0.509:0.00533)0.946:0.00701)0.866:0.00282)0.955:0.00673)0.944:0.00768,AY243345-1:0.03737)0.930:0.00679)0.964:0.00782,(LMWI010000:0.00405,(((CP005929-1:0.00113,((KJ094386-1:0.00112,AY040617-1:0.00055)0.990:0.00713,(AJ783996-1:0.01289,(AJ245712-1:0.00055,CP002399-2:0.00055)0.860:0.00054)0.965:0.00518)0.862:0.00247)0.775:0.00111,(AB037008-1:0.00318,FR733685-1:0.00394)0.808:0.00143)0.790:0.00152,CP003170-1:0.00300)0.810:0.00228)0.998:0.01407)0.902:0.00584,(((FJ486394-1:0.01895,D85475-1-1:0.01064)0.969:0.01001,(((((AHLX010000:0.00771,(X54286-1-1:0.03322,(Z38003-1-1:0.00235,(AJ306300-1:0.00108,(KJ433549-1:0.00843,JQ715420-1:0.01063)0.770:0.00054)0.830:0.00205)0.762:0.00138)0.358:0.00593)0.984:0.00924,(JMQJ010001:0.00313,(KJ396079-1:0.00699,ASJB010000:0.00210)0.000:0.00054)0.971:0.00628)0.769:0.00215,AFWY030000:0.01050)0.929:0.00644,((AVCN010003:0.00423,AF002818-1:0.00749)0.960:0.00906,AY340622-1:0.02798)0.974:0.00905)0.866:0.00359,((((((JFCR010000:0.00118,(X81913-1-1:0.01434,AB128981-1:0.00471)0.868:0.00602)0.961:0.00746,(AB004730-1:0.00725,(HM165487-1:0.00842,JYCR010000:0.01557)0.876:0.00525)0.864:0.00245)0.961:0.00559,((X82065-1-1:0.01607,(((JUMN010001:0.00312,((KC456598-1:0.02191,((AJ438041-1:0.0,AJ439348-1:0.0):0.00413,AJ439346-1:0.00209)0.811:0.00130)0.138:0.00110,(HM205109-1:0.01145,KC429600-1:0.00374)0.947:0.00531)0.769:0.00080)0.896:0.00215,CP003924-1:0.02022)0.748:0.00150,(EF463055-1:0.02162,(KF418790-1:0.00054,(JPUV010000:0.00055,LJVH010000:0.00481)0.882:0.00234)0.890:0.00473)0.733:0.00314)0.000:0.00055)0.911:0.00639,(AB055963-1:0.00468,(DQ171711-1:0.00447,X82053-1-1:0.00252)0.935:0.00741)0.925:0.00746)0.897:0.00378)0.833:0.00283,((LBNF010000:0.02625,AJ277970-1:0.01668)0.855:0.00788,AF543285-1:0.01970)0.777:0.00577)0.961:0.00860,(JVMD010000:0.00128,KF539917-1:0.00625)0.946:0.00747)1.000:0.02334,((AY608918-1:0.00229,AY608920-1:0.00200)0.999:0.02317,((((AB032565-1:0.00055,AY525785-1:0.00625)0.957:0.00522,(HM355749-1:0.00588,(LN854587-1:0.04919,AJ002093-1:0.00852)0.342:0.00124)0.888:0.00334)0.789:0.00227,(((JN627170-1:0.00212,HM195273-1:0.00055)0.000:0.00055,((((((AJ312907-1:0.00054,(JN627171-1:0.00224,FJ938167-1:0.00638)0.416:0.00322)0.740:0.00091,AF380930-1:0.00063)1.000:0.00060,(CP002907-2:0.00055,KC355269-1:0.00633)0.000:0.00055)0.000:0.00055,HG796145-1:0.00194)0.789:0.00107,AB162799-1:0.00403)0.870:0.00231,(FJ536300-1:0.00055,FJ536307-1:0.00055)0.975:0.00528)0.791:0.00108)0.993:0.01230,(HZ486626-1:0.00918,(FJ882017-1:0.02394,(AY337273-1:0.00545,((((((HE572590-1:0.00055,(CHJA010000:0.00057,AF480605-1:0.00055)1.000:0.00058)0.877:0.00166,(LWCM010000:0.00208,(((CP003899-4:0.00209,(AJ536032-1:0.00055,X58954-1-1:0.00055)0.819:0.00055)1.000:0.00058,X55587-1-1:0.00214)1.000:0.00056,(CP000479-1:0.00053,((CP002275-1:0.0,CP003347-1:0.0,CP003491-1:0.0):0.00055,(DD046432-1:0.00055,AM062764-1:0.00055)0.000:0.00055)0.854:0.00107)0.861:0.00109)0.731:0.00055)0.000:0.00055)0.883:0.00315,AJ536033-1:0.01226)0.766:0.00093,KP736080-1:0.00510)0.961:0.00532,KF378762-1:0.00866)0.753:0.00123,(JYNX010000:0.00101,((JN590246-1:0.00054,(HM770864-1:0.00211,((DQ054531-1:0.00244,(BCTB010000:0.00223,(HM011224-1:0.00416,AJ131761-1:0.00055)0.441:0.00211)0.638:0.00362)0.273:0.00338,((AY593980-1:0.00055,AB548599-1:0.00055)1.000:0.01271,AF480580-1:0.00052)0.918:0.00080)0.963:0.00052)0.802:0.00108)0.921:0.00303,((LN613105-1:0.00110,AF544638-1:0.00055)0.951:0.00316,((CP000384-3:0.0,CP000518-3:0.0):0.00055,AF387804-1:0.00055)0.994:0.00527)0.000:0.00054)0.914:0.00441)0.952:0.00518)0.815:0.00206)0.960:0.00630)0.507:0.00309)0.761:0.00189)0.954:0.00776)0.791:0.00271,(LN854589-1:0.04558,((KC262123-1:0.00054,(HM368646-1:0.00531,AY245543-1:0.00986)0.978:0.00653)0.933:0.00321,FN563149-1:0.00319)0.913:0.00380)0.564:0.00198)0.374:0.00214)0.928:0.00491)0.686:0.00132)0.747:0.00507)0.637:0.00285,(AJ865857-1:0.02218,(AB045870-1:0.00503,((JN609387-1:0.00428,(LC133074-1:0.00111,((((AB026220-1:0.00392,LC133071-1:0.00055)0.307:0.00111,(((((((((AB184123-1:0.00169,(LM999765-1:0.00055,(FJ486355-1:0.00402,KF973231-1:0.00113)0.628:0.00054)0.875:0.00206)0.791:0.00159,(JN885187-1:0.01567,KJ909966-1:0.01680)0.999:0.00054)0.000:0.00054,AB037565-1:0.00055)0.884:0.00214,(AFHJ010000:0.00055,HM235477-1:0.00220)0.904:0.00312)0.947:0.00421,DQ026632-1:0.00460)0.347:0.00055,AB184559-1:0.00109)0.913:0.00212,LFNT010001:0.00055)0.000:0.00055,(HE971709-3:0.00315,(HM149781-1:0.00112,((JN866753-1:0.00143,EU570387-1:0.00768)0.164:0.00272,DQ221754-1:0.00170)0.866:0.00227)0.792:0.00137)0.777:0.00109)0.786:0.00108,CP011664-1:0.00318)0.803:0.00083)0.905:0.00237,((((CP002993-9:0.00195,(CP011340-5:0.00110,(EU570732-1:0.00751,((EF408736-1:0.00423,(((LGUW010002:0.00416,(AB184420-1:0.00055,EU521693-1:0.00211)0.000:0.00055)0.833:0.00078,EF408733-1:0.00173)0.806:0.00180,EU841632-1:0.00640)0.784:0.00110)0.805:0.00110,KP739977-1:0.00456)0.485:0.00109)0.000:0.00054)0.862:0.00054)0.458:0.00110,CP003990-1:0.00091)0.915:0.00053,AJ391816-1:0.00737)0.000:0.00055,JYBE010001:0.00055)0.000:0.00055)0.757:0.00107,(LMWG010035:0.13155,JPPW010002:0.00810)1.000:0.00055)0.746:0.00110)0.889:0.00211)0.766:0.00112,AB022868-1:0.01174)0.921:0.00455)0.996:0.01429)0.977:0.00898)0.000:0.00053)0.572:0.00529)0.914:0.00590,((AY253863-1:0.01065,((Z78207-1-1:0.01605,(CCYQ010000:0.02217,(AF285117-1:0.01080,((ADXV010000:0.00524,(AFIL010000:0.0,CP002409-1:0.0):0.00196)0.989:0.00931,(AJ003055-1:0.00159,AB536774-1:0.01433)0.368:0.00324)0.963:0.00925)0.893:0.00729)0.990:0.01770)0.996:0.01817,(AF498652-1:0.01057,(JN180171-1:0.00964,ACLF030000:0.01885)0.873:0.00494)0.938:0.00668)0.931:0.00988)0.881:0.00915,AY650268-1:0.04628)0.956:0.00991)0.888:0.00778,(U58523-1-1:0.03699,(JOEP010001:0.01074,((AB006171-1:0.01423,(FJ481638-1:0.00426,AB184655-1:0.00215)0.995:0.01644)0.992:0.01549,D86945-1-1:0.02128)0.929:0.00746)0.912:0.00760)0.929:0.00912)1.000:0.03043)0.995:0.02072)1.000:0.03255,((((((((((EF565822-1:0.00937,CP000771-1:0.01258)1.000:0.05710,(M83140-1-1:0.00281,Z70248-1-1:0.02559)0.957:0.02053)0.906:0.01579,(AF355615-1:0.03750,((AB027016-1:0.00117,AB027017-1:0.00211)0.801:0.00248,(AB039768-1:0.00055,(CP000969-7:0.00111,M21774-1-1:0.00055)0.821:0.00110)0.870:0.00302)0.998:0.02567)0.895:0.01083)0.934:0.01224,((HM003109-1:0.05248,CP001634-1:0.01470)0.999:0.03857,AF326121-1:0.11865)0.604:0.01188)1.000:0.09021,((AF393376-1:0.05516,((AY263403-1:0.01782,AJ001049-1:0.00693)0.999:0.04819,((AF188332-1:0.00758,(AF528192-1:0.00829,CP001080-3:0.01343)0.998:0.02955)0.998:0.03437,((CP001130-7:0.00470,(CP004347-7:0.00055,CP004390-7:0.00054)0.880:0.00052)1.000:0.07662,((AJ278895-1:0.00985,Z30189-1-1:0.01511)0.762:0.01058,(ABHJ010000:0.03089,AJ309733-1:0.00820)0.992:0.02259)0.986:0.02698)0.996:0.03883)1.000:0.05478)0.996:0.03829)0.913:0.01272,(((JXOP010001:0.03710,X84211-1-1:0.04577)0.975:0.02088,(AJ430586-1:0.03012,(AB079382-1:0.02725,(((AIJQ010000:0.00089,AB020888-1:0.00141)0.982:0.01277,((L09663-1-1:0.00599,CP003126-1:0.00598)0.733:0.00743,LJJR010000:0.30697)0.732:0.00380)0.720:0.01091,Y18416-1-1:0.02516)1.000:0.03694)0.264:0.00619)0.855:0.01229)0.992:0.02986,(DQ022076-1:0.06581,((((AY743274-1:0.03664,(Y11332-1-1:0.01125,(AY876378-1:0.01305,EU427464-1:0.01231)0.249:0.00422)0.863:0.00546)0.181:0.00685,AJ000002-1:0.04900)0.866:0.00767,Y11331-1-1:0.01911)0.952:0.01407,EF141348-1:0.02043)1.000:0.04591)0.920:0.01701)1.000:0.07840)0.798:0.01235)0.211:0.00659,((DQ071273-1:0.04289,(((AF069287-1:0.05824,GQ149247-1:0.06106)0.326:0.00470,(U52817-1-1:0.05413,(ET631036-8:0.04119,AB565480-1:0.04631)0.070:0.00883)0.997:0.03586)0.754:0.01767,(AEIV010000:0.03778,(AF071414-1:0.13304,FR733707-1:0.00687)0.854:0.01867)0.984:0.02420)0.871:0.01624)0.362:0.01394,AB910748-1:0.06310)1.000:0.04338)0.270:0.00521,X69335-1-1:0.18151)0.955:0.01853,AM749780-1:0.12964)0.887:0.00774,((((AF391972-1:0.05728,(AJ420142-1:0.02813,JQ346739-1:0.10593)0.992:0.05447)0.915:0.01950,(((AB067647-1:0.06020,(LGFU010000:0.11388,(((JSWM010000:0.0,CP000688-8:0.0,CP001924-8:0.0):0.00055,AJ965256-8:0.00055)0.892:0.00055,(KC342961-1:0.00055,CP001827-8:0.00106)0.884:0.00175)1.000:0.11884)0.832:0.01791)0.919:0.01848,(FW306006-4:0.11343,((AB041226-1:0.00577,CP000686-1:0.02038)1.000:0.05419,(AF093427-1:0.04426,(CP001364-7:0.00054,(AJ308500-1:0.00229,AJ308499-1:0.02185)0.755:0.00113)0.996:0.03320)0.987:0.04066)0.964:0.03702)0.999:0.05950)0.582:0.01571,AM180156-1:0.14593)0.511:0.01115)0.997:0.03452,(X69194-1-1:0.00294,CP001251-1:0.00256)1.000:0.06699)0.925:0.01423,AB077817-1:0.11522)0.522:0.00207)0.385:0.00670,(((AF132790-1:0.00476,CP003587-2:0.00374)1.000:0.03403,((CP000239-1:0.01618,CP000240-1:0.01708)0.994:0.02812,((AB039018-1:0.02664,CP003594-1:0.05313)0.974:0.01796,((CP001344-5:0.01675,((BA000039-2:0.00055,CP006735-1:0.00106)0.999:0.02562,((AB058298-1:0.02554,(ABRV010000:0.01972,ALVN010000:0.02356)0.998:0.02150)0.070:0.00954,(CT978603-3:0.00336,((((AF001477-1:0.00118,KF417646-1:0.00503)0.966:0.00594,AANO010000:0.00307)0.922:0.00478,ABSE010000:0.00415)0.841:0.00530,(CP000551-3:0.01029,(((AAOK010000:0.00109,AF081834-1:0.00457)0.955:0.00414,(AGIK010000:0.00055,CP000435-5:0.00109)0.000:0.00054)0.932:0.00417,((AATZ010000:0.0,CP000097-3:0.0):0.00107,((AAUA010000:0.00522,(CP000110-4:0.0,AY172836-1:0.0):0.00417)0.782:0.00103,(AANP010000:0.00722,BX569694-1:0.00053)0.557:0.00303)0.000:0.00054)0.737:0.00110)0.910:0.00455)0.886:0.00552)0.926:0.00648)0.999:0.03450)0.937:0.01265)0.788:0.00536)0.871:0.00715,((((AJ344564-1:0.03923,(AB039008-1:0.02159,((AJ000708-1:0.01182,AJ000711-1:0.00802)1.000:0.03975,(AB035549-1:0.03466,CP002198-1:0.01059)0.910:0.01051)0.265:0.00640)0.544:0.00282)0.901:0.00733,((AJ000716-1:0.00498,CP003946-1:0.01142)1.000:0.03283,(AB039014-1:0.04660,(((AJ000715-1:0.02165,(CAQM010003:0.00799,(AAXW010000:0.00111,AF132771-1:0.00108)0.862:0.00396)0.961:0.00953)0.973:0.01349,(AF296873-1:0.00312,CP001701-2:0.00055)0.984:0.01168)0.909:0.00587,((AEPQ010002:0.00234,KP890773-1:0.02280)0.995:0.01999,(AF132782-1:0.03185,CP003947-1:0.01410)0.993:0.02591)0.257:0.00367)0.783:0.00277)0.761:0.00300)0.761:0.00408)0.942:0.00818,((GQ402018-1:0.03582,((AAVU010000:0.01318,(AB074508-1:0.00295,AF260509-1:0.00168)0.992:0.01800)0.970:0.01164,(AF284803-1:0.02102,(EU244875-1:0.00637,CP000393-3:0.00673)0.999:0.02027)0.778:0.00246)0.925:0.00903)0.913:0.00992,(((CP003630-3:0.02464,(((AM230677-1:0.02373,((HM573458-1:0.00756,(AB016520-1:0.00364,(AJ630454-1:0.00825,CP003548-2:0.00786)0.956:0.00718)0.911:0.00609)0.920:0.00635,(((AF247592-1:0.01329,(ACYB010000:0.00120,HG942524-1:0.02524)0.999:0.02329)0.887:0.00457,(CP003284-4:0.01592,AJ781132-1:0.01216)0.389:0.00396)0.863:0.00633,HQ700838-1:0.02067)0.371:0.00058)0.543:0.00271)0.884:0.00378,CP003943-1:0.00195)0.807:0.00188,AF132789-1:0.00271)0.999:0.02112)0.443:0.00305,(AB039005-1:0.04263,CP003646-4:0.01633)0.941:0.00979)0.879:0.00425,((AJUB010000:0.03452,CP003600-1:0.02754)0.302:0.00869,AB115964-1:0.01930)0.956:0.01106)0.243:0.00286)0.628:0.00583)0.955:0.01110,CP003591-2:0.02659)0.835:0.00678)0.969:0.01220)0.998:0.02540)0.860:0.01115)1.000:0.05607,((((((AJ229235-1:0.01321,(ABEA030001:0.00671,(AHKS020000:0.0,CP007053-2:0.0):0.00481)0.995:0.01990)0.970:0.02382,(ABSI010000:0.04831,AB266750-1:0.04795)0.650:0.02080)0.999:0.06692,(CP000975-8:0.07287,(ABOX020000:0.06455,(AY388649-1:0.03420,(AY271254-1:0.06706,X90515-1-1:0.04243)0.962:0.02213)0.873:0.03066)0.888:0.02049)0.951:0.03531)0.991:0.04391,((AY390428-1:0.09589,AY049713-1:0.08098)0.997:0.05866,((D85718-1-1:0.01061,(JN606073-1:0.00523,(D85708-1-1:0.00304,(AB001778-1:0.00055,(AB001784-1:0.00106,AB001783-1:0.00106)0.000:0.00055)0.777:0.00107)0.847:0.00295)0.965:0.01054)1.000:0.04798,(AF042496-1:0.05354,(U68460-1-1:0.06855,(DQ309029-1:0.01021,KF924591-1:0.02517)0.897:0.01323)0.861:0.01115)0.714:0.01142)1.000:0.11002)0.497:0.02229)0.276:0.02328,(AB447464-1:0.18891,(((AJ231191-1:0.11796,(AJ231195-1:0.05368,KF467526-1:0.03529)1.000:0.08347)0.862:0.01810,(AJ231183-1:0.06392,(FJ624344-1:0.05961,X62912-1-1:0.04573)0.305:0.01284)0.969:0.02322)0.723:0.00544,((AM162407-1:0.04958,X62911-1-1:0.04381)0.995:0.03338,(AJ231184-1:0.03550,AJ231190-1:0.05764)0.806:0.01833)0.956:0.01985)0.998:0.05432)0.999:0.06401)0.990:0.02392,((U32595-1-1:0.05970,X89077-1-1:0.04310)0.999:0.04733,(L22016-1-1:0.01307,(AB022034-1:0.01405,CP002304-9:0.00054)1.000:0.06994)0.986:0.03204)0.985:0.03247)0.848:0.00619)0.829:0.00407)0.945:0.01027)0.920:0.01061,(((((AJ518871-1:0.04942,(AB036759-1:0.02731,(M59120-1-1:0.01494,X96954-1-1:0.02471)0.949:0.01210)0.987:0.02455)0.975:0.02184,((((AP012202-1:0.0,AP012209-4:0.0):0.00392,AP012210-4:0.00127)1.000:0.07751,((CP000673-1:0.02421,(GU139551-1:0.00111,Y18178-1-1:0.00053)0.982:0.01550)0.997:0.02321,((LHYV010000:0.00297,AB035087-1:0.00129)1.000:0.02839,(((HM051337-1:0.01853,(AB971795-1:0.01397,(LIDW010000:0.00468,(CP006721-5:0.00055,((U16122-37-:0.00055,(AB020187-1:0.00279,GU060306-1:0.00324)0.927:0.00055)0.809:0.00055,(AFWX010000:0.00107,FJ610237-1:0.00852)0.000:0.00055)0.819:0.00103)0.897:0.00337)0.974:0.00867)0.847:0.00377)0.855:0.00705,FR870444-1:0.02135)0.784:0.00477,((LAGH010000:0.01776,X74770-1-1:0.02627)0.955:0.01170,((JF824801-1:0.01508,(FR733710-1:0.01808,HC491093-1:0.02108)0.917:0.00690)0.574:0.00718,X71849-1-1:0.01845)0.847:0.00754)0.760:0.00157)0.867:0.00736)0.741:0.00741)0.420:0.00563)1.000:0.04148,(HE582772-1:0.04022,(((HM596293-1:0.03038,((FJ577254-1:0.01392,GU993268-1:0.01372)0.586:0.01374,(EU526290-1:0.02608,(AF542230-1:0.02113,(BAEW010000:0.01177,LRQE010000:0.01109)0.993:0.01783)0.958:0.01410)0.895:0.01079)0.957:0.01579)0.986:0.02066,(((AF542229-1:0.00319,KC311747-1:0.00433)0.984:0.02115,(AF542232-1:0.00928,AF542233-1:0.01327)0.940:0.01488)1.000:0.07565,(AY435495-1:0.05677,(DQ082898-1:0.08317,AB109769-6:0.03961)0.753:0.00416)0.764:0.00666)0.852:0.00690)0.979:0.01701,((((AY326462-1:0.00218,DQ160208-1:0.00310)0.994:0.02172,(AB075770-1:0.01234,(ABEZ020000:0.00945,AB023970-1:0.01575)0.044:0.00273)0.861:0.00654)0.999:0.03090,(AJ006962-1:0.07645,(ACON010000:0.02614,AGWI010000:0.02312)0.998:0.03195)0.436:0.00613)0.878:0.01056,(HZ484951-8:0.03323,HZ484952-2:0.01592)0.979:0.02002)0.984:0.02287)0.649:0.00909)0.871:0.00810)0.420:0.00958)0.919:0.01441,((X71851-1-1:0.05157,(((AB038359-1:0.03107,((ACTV010000:0.00055,AB534168-1:0.00055)0.996:0.01379,(CYXL010000:0.01395,(ACII020000:0.00598,CZBA010000:0.01143)0.987:0.01160)0.646:0.00480)0.709:0.00480)0.910:0.00737,((ACTX010000:0.00106,ADCR010000:0.00055)0.976:0.00732,(((((HZ486353-2:0.00496,((CZAX010000:0.00837,DM464569-1:0.00218)0.925:0.00399,(ACTN010000:0.01034,(ACWQ010000:0.0,AAVP020000:0.0):0.00129)0.818:0.00208)0.950:0.00541)0.926:0.00054,(JAGQ010000:0.00052,ACTO010000:0.00209)0.960:0.00316)0.962:0.00439,ADBG010001:0.01040)0.813:0.00074,((CZAC010000:0.00874,CS600346-9:0.01250)0.977:0.00901,((AB023972-1:0.00451,AF262239-1:0.00055)0.970:0.00797,AB020727-1:0.01742)0.428:0.00404)0.876:0.00238)0.811:0.00156,L34421-1-1:0.02049)0.843:0.00224)0.761:0.00154)0.716:0.00106,((((AJ311620-1:0.01995,((ACCJ010005:0.00320,(DQ279737-1:0.00865,(ABQR010000:0.00420,(AJ002591-1:0.00138,AB649278-1:0.00110)0.932:0.00374)0.000:0.00055)0.258:0.00427)0.976:0.01069,((ACWK010001:0.0,CYZY010000:0.0):0.01383,(ACFX020000:0.00055,FP929060-3:0.01808)0.956:0.00788)0.922:0.00748)0.740:0.00174)0.801:0.00426,(HZ485101-4:0.03675,((((((AY169428-1:0.01765,CYYR010000:0.01308)0.280:0.00424,AB004910-1:0.03192)0.774:0.00318,(CYZJ010000:0.00054,HM007565-1:0.00659)0.745:0.00186)0.850:0.00570,AF399956-1:0.03486)0.919:0.00559,(AY169422-1:0.01425,ACTP020000:0.02174)0.920:0.00577)0.859:0.00249,(AGEL010000:0.03994,(X87151-1-1:0.06265,(FJ577249-1:0.02519,(FJ577261-1:0.00198,(AFZC020000:0.00109,(HM120211-1:0.00055,HM596292-1:0.00055)0.917:0.00209)0.665:0.00054)0.964:0.01237)0.451:0.01039)0.025:0.00492)0.960:0.00997)0.832:0.00268)0.784:0.00186)0.875:0.00340,((AJ318527-2:0.02998,AP012212-1:0.03035)0.970:0.01351,((AB372004-1:0.01538,CP001810-1:0.03941)0.974:0.01205,((CYYZ010000:0.02380,L34420-1-1:0.02226)0.966:0.01051,(HZ485231-9:0.01354,AB525414-1:0.02889)0.938:0.00866)0.810:0.00304)0.000:0.00053)0.887:0.00500)0.883:0.00378,(JPOF010000:0.03554,(AJ270487-1:0.00902,((JYFK010001:0.0,CYXT010000:0.0):0.00106,ABGC030000:0.00055)0.972:0.00798)0.979:0.01343)0.938:0.00703)0.784:0.00455)0.983:0.02176)0.999:0.03775,(((((FW562650-1:0.00808,CP003259-4:0.00073)0.997:0.02748,((AB186359-1:0.00310,(HG917926-1:0.00055,AJ310082-1:0.06266)0.995:0.01527)0.979:0.01024,JQ820024-1:0.00235)0.974:0.01440)0.965:0.01283,(CP001850-2:0.04484,(AB238598-1:0.02897,(ADDX020000:0.00697,(EU541439-1:0.00615,HZ486287-1:0.00332)0.945:0.00878)0.847:0.01159)0.998:0.02650)0.897:0.01475)0.966:0.01429,HW313928-1:0.06610)0.903:0.00865,(ABCA030000:0.04947,((Y18181-1-1:0.02329,(AY445600-1:0.02655,(JN866826-1:0.02476,AB910742-1:0.00838)0.847:0.00949)0.863:0.00675)0.801:0.01005,(AJ315980-1:0.03124,((ACWW010000:0.01000,AJ518869-1:0.03020)0.995:0.02271,(AY295777-1:0.04475,X85099-1-1:0.03334)0.851:0.01150)0.157:0.00405)0.944:0.01120)0.329:0.00554)0.534:0.01031)0.977:0.02218)0.943:0.01569)0.947:0.01335,(((((AY422712-1:0.03689,((((X59765-1-1:0.02488,X70907-1-1:0.03294)1.000:0.04237,((((JUIL010000:0.00054,((HG931728-1:0.00850,EU526815-1:0.00112)0.835:0.00103,AB008212-1:0.00055)0.798:0.00105)0.983:0.00992,(((((JROC010000:0.00574,(AJ292530-4:0.01211,(AY253659-1:0.00281,(KC561105-1:0.01912,(EU547312-1:0.00267,EU626021-1:0.00692)0.961:0.00865)0.765:0.00323)0.981:0.01397)0.977:0.01045)0.371:0.00243,(HG798472-1:0.04014,AY253658-1:0.00283)0.887:0.00521)0.999:0.01972,((EU559597-1:0.01161,(((FR681899-1:0.00109,FR681901-1:0.00113)0.840:0.00275,((JRUT010000:0.00114,((AY253660-1:0.00055,((LJOL010001:0.00212,JRQG010002:0.00415)0.789:0.00104,AJ575259-1:0.00526)0.785:0.00106)0.434:0.00108,EF120368-1:0.00411)0.594:0.00216)0.881:0.00340,HZ485807-3:0.00712)0.269:0.00340)0.941:0.00828,AB680531-1:0.02370)0.965:0.01072)0.868:0.00650,(Y16329-1-1:0.01683,(AB008209-1:0.00055,(FJ557010-1:0.00222,FR681902-1:0.00206)0.790:0.00105)0.764:0.00104)0.915:0.00662)0.999:0.02171)0.267:0.00429,((AB023238-1:0.00716,(JWHT010000:0.00273,AY035891-1:0.01980)0.882:0.00476)0.420:0.00540,(AB023239-1:0.01090,((AB022924-1:0.01584,AB221475-1:0.00052)1.000:0.10227,(AB023242-1:0.00463,(CCNH010000:0.00231,((AM491819-1:0.00055,CP002898-1:0.00055)0.812:0.00109,((AB470240-1:0.01681,CP003839-1:0.00053)0.331:0.00105,AB022925-1:0.00219)0.878:0.00206)0.353:0.00191)0.464:0.00687)0.594:0.00672)0.367:0.00470)0.998:0.02781)0.999:0.03072)0.716:0.00668,((EU626024-1:0.01775,(AB326350-1:0.01398,AB326354-1:0.02062)0.888:0.01030)0.831:0.00629,AY255802-1:0.01266)0.874:0.01428)0.802:0.00389)0.859:0.00565,(((KM005146-1:0.00814,KJ128214-1:0.00243)0.939:0.00720,((LBDF010000:0.01378,(LQNG010001:0.01073,(BCLJ010000:0.01680,AJ496791-1:0.00967)0.974:0.01196)0.366:0.00247)0.638:0.00242,(AJ621555-1:0.00747,(LJIU010000:0.00101,AB018212-1:0.03504)0.797:0.00239)0.994:0.01324)0.558:0.00339)0.012:0.00416,(KC416987-1:0.02867,M58818-1-1:0.00843)0.980:0.01628)0.386:0.00383)0.939:0.00987,(LN827925-1:0.00055,AJ270951-1:0.00055)0.981:0.00956)0.916:0.00869)0.750:0.00548,(AP012046-2:0.03051,(((HM218552-1:0.00473,((HG798413-1:0.08429,AB012306-1:0.02009)0.993:0.02675,(LTAK010000:0.01363,((((((LQZF010001:0.0,AGZY010000:0.0):0.00055,(KM225750-1:0.00055,KC817215-1:0.00055)0.934:0.00208)0.912:0.00093,(((CHNY010000:0.00257,(JUQX010000:0.0,JVQB010015:0.0,JYGM010000:0.0):0.00107)0.723:0.00055,AJMM010000:0.00055)0.000:0.00055,JUNW010000:0.00055)1.000:0.00054)0.763:0.00206,((((AB002484-1:0.00211,DQ462421-1:0.00108)0.780:0.00055,(EU620577-1:0.00421,JRQN010000:0.00511)0.924:0.00305)0.376:0.00308,LBKL010000:0.00114)0.972:0.00628,(LAWK010000:0.00055,(((JUYP010000:0.00204,(CP006776-3:0.0,CP006805-1:0.0):0.00189)0.350:0.00151,AB008314-1:0.00312)0.757:0.00133,((((AY584477-1:0.00735,DQ303194-1:0.00274)0.879:0.00457,((AP012054-1:0.00055,(LQOF010004:0.00055,HE613569-1:0.00106)0.768:0.00106)0.809:0.00106,(LPVR010000:0.00055,(AJ297214-1:0.00055,KC433735-1:0.00055)1.000:0.00059)0.823:0.00106)0.804:0.00107)0.777:0.00130,(((AB002483-1:0.01401,LRHG010000:0.22443)0.645:0.00053,AB002515-1:0.02676)0.876:0.00080,(AB002523-1:0.00310,DQ303203-1:0.00212)0.810:0.00186)0.797:0.00312)0.890:0.00314,((HM596280-1:0.00081,((HM596286-1:0.0,CP002888-1:0.0):0.00055,CP006819-1:0.00103)0.991:0.00856)0.595:0.00211,FILM010000:0.00641)0.418:0.00110)0.769:0.00081)0.778:0.00106)0.981:0.00412)0.650:0.00054)0.881:0.00193,((LQRC010002:0.00226,AY099095-1:0.00498)0.772:0.00212,AB008313-1:0.00097)0.001:0.00054)0.946:0.00626,(HM596279-1:0.01097,((AJ420199-1:0.02169,(EU483236-1:0.00586,AJ420201-1:0.00868)0.867:0.00526)0.828:0.00597,(BASW010000:0.00667,(JVLV010000:0.00055,AB355605-1:0.00055)0.943:0.00578)0.863:0.00516)0.722:0.00511)0.906:0.00628)0.206:0.00337)0.932:0.01018)1.000:0.02843)0.885:0.00456,(JUPQ010000:0.00196,(JULR010002:0.00206,JN995580-1:0.00851)0.925:0.00334)0.782:0.00209)0.200:0.00055,(((JUOP010002:0.0,FP929058-3:0.0):0.00647,AJ301842-1:0.01069)0.780:0.00096,(CDRD010022:0.00055,(AB681191-1:0.00210,JN645290-1:0.00110)0.805:0.00110)0.807:0.00109)0.785:0.00109)0.790:0.00092)0.968:0.00667)0.703:0.00175,(((JN801174-1:0.00556,D50540-1-1:0.00054)0.914:0.00640,(HZ485561-4:0.01431,(Y15716-1-1:0.01796,(Y10772-1-1:0.00355,Y18053-1-1:0.00319)0.896:0.00723)0.969:0.01277)0.993:0.02010)0.939:0.00647,(KC213904-1:0.00708,(CP002563-2:0.00158,(ABHH010000:0.00204,CP006812-1:0.00053)0.473:0.00265)0.957:0.00695)0.955:0.00791)0.751:0.00085)0.761:0.00206)0.981:0.01389,(JN852815-1:0.00238,((EU545982-1:0.00110,DQ065846-2:0.00055)0.796:0.00080,((FJ774235-1:0.00054,(DQ065839-2:0.00055,AJ549930-1:0.00111)0.917:0.00206)0.804:0.00109,JRYZ010000:0.00620)0.722:0.00137)0.966:0.01025)0.993:0.01294)0.851:0.00453,(((DQ302410-1:0.01432,(CP006866-2:0.00055,(DQ019164-1:0.00055,GQ869573-1:0.00110)0.764:0.00108)0.901:0.00406)1.000:0.01773,((((AB112727-1:0.00328,((FJ851432-1:0.00586,AY373018-1:0.02360)0.873:0.00466,(BARH010000:0.00841,(((CP001638-1:0.00055,(AJJN010000:0.00110,CP002293-1:0.00055)0.945:0.00317)0.876:0.00323,((EU484348-1:0.00055,((JYCF010000:0.0,CP001794-1:0.0,CP002050-1:0.0,CP002442-1:0.0):0.00057,CP004008-1:0.00114)1.000:0.00058)0.968:0.00498,(CP006254-1:0.00316,(ABVH010000:0.00055,CP000557-1:0.00214)0.000:0.00054)0.650:0.00053)0.754:0.00503)0.929:0.00810,AY753654-1:0.02421)0.848:0.00745)0.845:0.00359)0.799:0.00054)0.777:0.00103,(EF581819-1:0.04602,JQ073764-1:0.00855)0.905:0.01076)0.854:0.00325,(EU628681-1:0.00356,KT719928-1:0.01775)0.769:0.00193)0.923:0.00349,((((AB013373-4:0.00574,((EU605978-1:0.01574,AB112720-1:0.00732)1.000:0.03745,(AB254031-1:0.02451,(((AB073202-1:0.01538,CP001656-1:0.00419)0.932:0.00689,(((JN650279-1:0.00652,(AF039409-1:0.01142,(AEXS010000:0.00055,CP001793-1:0.00055)0.898:0.00054)0.964:0.00698)0.821:0.00238,(AJ318910-1:0.00500,(JMIQ010000:0.00055,HG794410-1:0.00127)0.912:0.00478)0.961:0.00804)0.952:0.00737,((HM059716-1:0.01803,GQ266393-1:0.00404)0.988:0.01571,(CAES010001:0.02051,AB073204-1:0.00567)0.839:0.00501)0.827:0.00337)0.876:0.00331)0.321:0.00459,(HM071942-1:0.00540,AB073200-1:0.00544)0.853:0.00301)0.897:0.00454)0.915:0.00873)0.968:0.01257)0.771:0.00165,((AB043852-1:0.00615,CP001791-1:0.01122)0.990:0.01320,EU533950-1:0.03443)0.849:0.00332)0.964:0.00535,((LC099530-1:0.01428,HQ586882-1:0.00754)0.885:0.00421,(AGAV010000:0.02108,(D82065-1-1:0.02255,(ANPF010001:0.00461,EU602318-1:0.01161)0.679:0.00536)0.961:0.01061)0.821:0.00444)0.897:0.00403)0.881:0.00213,(((((HM245299-1:0.01176,AB017538-1:0.01129)0.846:0.00430,(AJ314744-1:0.00055,(ANBV010000:0.00211,LK391661-1:0.00055)0.907:0.00211)0.911:0.00503)0.849:0.00357,(AAOX010000:0.00053,HM209762-1:0.00233)0.906:0.00320)0.760:0.00118,(((AB720123-1:0.00915,(KT720097-1:0.01464,((JN999842-1:0.00055,AB021199-1:0.00209)1.000:0.00055,((JSZW010000:0.00055,(LOMT010000:0.00055,(JEOF010001:0.00055,LC092937-1:0.07560)0.000:0.00054)1.000:0.00054)0.000:0.00053,AJ310100-1:0.00055)0.905:0.00078)0.728:0.00198)0.959:0.00671)0.832:0.00237,((KJ496371-1:0.00726,(CAEU010000:0.00514,JF824796-1:0.00110)0.990:0.00974)0.966:0.00816,((AJ006086-2:0.00543,JQ958844-1:0.01195)0.981:0.00868,(AAXV010000:0.00209,LK391668-1:0.00055)0.986:0.00902)0.909:0.00455)0.896:0.00507)0.451:0.00488,ACPC010000:0.01127)0.791:0.00378)0.819:0.00180,(ABCF010000:0.02191,((JYBQ010000:0.00109,JN700094-1:0.00319)0.779:0.00110,(((LK391703-1:0.02241,(JXHQ010001:0.00055,(LHCC010000:0.00055,(AB021198-1:0.00055,(JN824998-1:0.01682,JN585825-1:0.00212)0.999:0.00055)1.000:0.00058)0.000:0.00056)0.780:0.00102)0.998:0.00055,(AJST010000:0.0,AP012495-9:0.0,CP003492-9:0.0):0.00055)0.000:0.00055,((LDWK010000:0.00054,KC414720-1:0.00055)0.738:0.00054,AJ971880-1:0.00431)0.967:0.00409)0.464:0.00210)0.989:0.01106)0.652:0.00288)0.889:0.00054)0.760:0.00079)0.976:0.00866)0.818:0.00539,(KC212014-1:0.00054,(FJ536211-1:0.00792,(AB009934-1:0.00202,((((LORQ010000:0.00054,(((CVOX010000:0.00055,DQ127902-1:0.00055)0.924:0.00207,JUUP010002:0.00110)0.000:0.00055,(AB009935-1:0.00055,AB626127-1:0.00055)0.000:0.00055)0.876:0.00186)0.794:0.00206,((HM100199-1:0.00393,AB233327-1:0.00105)0.876:0.00255,(HG941668-1:0.00311,EU707796-1:0.00728)0.924:0.00312)0.809:0.00130)0.809:0.00083,LC126626-1:0.01269)0.000:0.00053,AJ717375-1:0.00055)0.903:0.00322)0.633:0.00433)0.999:0.02548)0.999:0.02391)0.020:0.00323)0.908:0.01255,(JUOB010000:0.00148,JQ726525-1:0.00074)1.000:0.04054)0.880:0.01483,(EF999972-1:0.02916,(((((((JN644755-1:0.00313,AJ419900-1:0.00055)1.000:0.03146,(AF412969-1:0.02074,(X52083-1-1:0.03410,(AF538682-1:0.00601,AB680678-1:0.00499)0.914:0.00879)0.956:0.01186)0.788:0.00721)0.961:0.02389,(AL445565-1:0.03811,((EU714234-1:0.00952,(JN935889-1:0.02322,U44770-1-1:0.01091)0.987:0.01593)1.000:0.03783,(JRHE010000:0.00835,M24580-1-1:0.00821)0.998:0.02723)0.862:0.01103)0.581:0.00377)1.000:0.10794,(JX843736-1:0.14116,(AB681225-1:0.01138,(U26055-1-1:0.00826,(CP010267-6:0.00055,(U26045-1-1:0.00055,FR668087-2:0.00055)0.000:0.00055)0.964:0.00864)0.950:0.01079)0.999:0.04981)0.470:0.00746)0.985:0.02859,(M23932-1-1:0.04397,(FJ943262-1:0.05478,FO681347-2:0.01189)0.783:0.00788)1.000:0.07341)0.238:0.01158,(((AB649277-1:0.01441,(ACTK010000:0.00838,ACTJ010001:0.00055)0.976:0.01799)0.796:0.01497,(AB018186-1:0.02785,(CVOD010001:0.02835,ABYT010000:0.02345)0.863:0.00986)0.983:0.01910)1.000:0.04357,(LT223581-1:0.03408,(AB034200-1:0.01906,AF220064-1:0.04924)0.218:0.00922)0.964:0.02289)0.928:0.01650)0.591:0.01531,(AJ621549-1:0.10471,(M23731-1-1:0.00900,AB818948-1:0.01694)0.798:0.01864)0.998:0.04537)0.991:0.02731)0.949:0.01988)0.986:0.01911)0.979:0.01933,(((HM228391-1:0.03862,AF130258-1:0.06443)0.961:0.02317,(AP006840-2:0.07031,((AB680831-1:0.04952,(AB042056-1:0.01256,AB059678-1:0.00822)0.992:0.03110)0.971:0.02977,(AB089842-1:0.11345,(AB011495-1:0.00152,AF343566-1:0.00414)0.991:0.02411)0.175:0.01291)0.869:0.01048)0.831:0.01153)0.891:0.00566,(((((AJ294431-1:0.04447,(Y11566-1-1:0.05248,((AY961415-1:0.01500,EF081293-1:0.00730)0.888:0.00516,(AB294140-1:0.01663,(AY742958-1:0.01548,CP000612-1:0.00836)0.177:0.00203)0.900:0.00519)0.995:0.02019)0.666:0.01184)0.927:0.00840,(AB035723-1:0.02787,AJ294427-1:0.05315)0.740:0.00322)0.913:0.00890,(CP002028-2:0.04068,(((((AHLV010000:0.00108,AF076244-1:0.00218)0.841:0.00209,(AJ493052-1:0.00394,CP003639-1:0.00393)0.887:0.00298)0.908:0.00436,((CP003869-3:0.0,CP003870-3:0.0):0.01881,(CP002547-2:0.03187,(AF297871-1:0.00432,(AJ565938-1:0.00544,(AJ276701-1:0.00214,L28946-1-1:0.00434)0.781:0.00102)0.948:0.00430)0.896:0.00695)0.149:0.01067)0.000:0.00054)0.999:0.02393,((X65935-1-1:0.01219,AF473835-1:0.00525)1.000:0.03798,((((FJ489243-1:0.01045,AB300988-1:0.00335)1.000:0.03984,((AB003379-1:0.01132,GU227153-1:0.02080)0.997:0.02694,(D89882-1-1:0.02893,((D89883-1-1:0.00520,(HZ486369-2:0.00817,(AY878645-1:0.01265,(AGZT010000:0.00421,(AENV010000:0.00110,HM596274-1:0.00110)0.000:0.00055)0.956:0.00663)0.906:0.00738)0.868:0.00321)0.452:0.00134,AF287802-1:0.00119)0.982:0.01556)0.660:0.00975)0.955:0.01142)0.897:0.00793,(FR749974-1:0.03162,(LK391729-1:0.02951,AJ010964-1:0.01984)0.936:0.01122)0.818:0.00672)0.851:0.01178,((AY850117-1:0.00708,(AB626632-1:0.01313,(CYZS010004:0.00285,AB370249-1:0.00455)0.877:0.00436)0.838:0.00954)1.000:0.03552,((LSDO010000:0.00113,(AY995768-1:0.00055,(HM596287-1:0.00213,LOJO010000:0.00215)0.865:0.00212)0.789:0.00104)0.999:0.02400,(KC632239-1:0.01594,(U95027-1-1:0.01626,AFIJ010000:0.01913)0.796:0.00120)0.988:0.01661)0.129:0.00221)0.981:0.01540)0.484:0.00761)1.000:0.03862)0.791:0.00920,AB100836-1:0.05991)0.099:0.00711)0.211:0.00388)0.944:0.01273,(AJ242494-1:0.02848,((AB021305-1:0.02996,DQ449034-1:0.02973)0.998:0.02876,((LN831307-1:0.02908,((AJ250846-1:0.01228,AY701758-1:0.00398)0.980:0.01719,((AF542517-1:0.00236,(HE601761-1:0.00543,(ACXP020000:0.0,CP000923-4:0.0,CP002210-4:0.0):0.00055)0.000:0.00054)0.766:0.00149,(HM228407-1:0.00550,(DQ681066-1:0.00055,AF120479-1:0.00212)0.927:0.00425)0.894:0.00526)0.959:0.01134)0.970:0.01939)0.992:0.02058,((AB020336-1:0.03618,CP000141-1:0.04525)0.296:0.01200,(CP000860-1:0.05278,CP001785-1:0.03201)0.976:0.02119)0.880:0.00779)0.950:0.01185)0.795:0.00583)0.942:0.00968)0.907:0.00741,(CP001034-1:0.04817,(ACJM010000:0.03648,FJ620692-1:0.07270)0.690:0.02166)0.875:0.01251)0.652:0.00248)0.672:0.00216)0.966:0.01174)0.885:0.00649)0.905:0.00732)0.761:0.00232,(((AP009510-1:0.07530,(AM490846-1:0.09499,FJ902046-1:0.05079)0.992:0.04324)1.000:0.07076,(AB231858-1:0.09363,(FP929003-1:0.08757,(JN007036-1:0.04297,(AJ237903-1:0.00416,AY485647-1:0.00125)0.956:0.01300)0.997:0.04844)0.986:0.03887)0.680:0.01518)0.957:0.02038,((CP000473-1:0.07807,(LMXM010000:0.09852,(CP000360-5:0.03106,(AB561885-1:0.01883,((DQ660892-1:0.00781,((HQ687088-1:0.0,CP002480-3:0.0):0.01146,CP003130-6:0.00997)0.928:0.00799)0.806:0.00421,CP002467-3:0.00593)0.831:0.00592)0.859:0.01777)0.999:0.05084)0.448:0.01174)0.986:0.03341,(X77215-1-1:0.07398,FP565575-1:0.06023)0.608:0.01987)0.721:0.00836)0.860:0.01186)0.000:0.00051,(CP002432-1:0.09772,(AF146526-1:0.07393,(AB364234-1:0.05486,(AB086060-1:0.03102,CP002858-2:0.03988)0.771:0.01236)0.426:0.00977)0.997:0.03406)0.948:0.01713)0.987:0.01383)0.791:0.00254,((JN896752-1:0.05996,(AB071665-1:0.01772,(((((((AY509242-1:0.01125,(AB680510-1:0.03003,((AP012222-2:0.00328,((AJVL010000:0.00618,JGVR010000:0.00137)0.775:0.00619,(AAQG010000:0.00777,(JX002660-1:0.00410,(KC764963-1:0.01746,AY519129-1:0.00175)0.916:0.00054)0.990:0.01024)0.831:0.00283)0.923:0.00908)0.982:0.01023,((AB021370-1:0.01098,(KJ606798-1:0.00055,(AHIS010001:0.00411,AIDW010000:0.00108)0.624:0.00054)0.851:0.00267)0.894:0.00532,(AF503278-1:0.01346,(JQMC010000:0.00603,(AFMP010000:0.00924,CP004036-1:0.00236)0.648:0.00366)0.965:0.00988)0.819:0.00724)0.730:0.00760)0.865:0.00476)0.960:0.00944)0.827:0.00302,((GU244504-1:0.00409,((KP721487-1:0.00111,(LN613121-1:0.01428,EU984513-1:0.00248)0.919:0.00501)0.880:0.00427,((ADAE010000:0.00566,AEUE010000:0.00620)0.999:0.02031,(JMIX010000:0.00370,AAMW010000:0.00774)0.885:0.00771)0.949:0.00973)0.905:0.00322)0.762:0.00100,DQ448852-1:0.00991)0.949:0.00494)0.367:0.00246,AMRV010000:0.02165)0.996:0.02155,CP002382-4:0.07654)0.623:0.00608,((ALYF010000:0.02946,(HZ486159-1:0.01377,((AB014055-1:0.00644,AB016610-1:0.00831)0.861:0.01318,((CP000927-4:0.01277,(LNIY010000:0.00463,(AB008531-1:0.00055,AB023427-1:0.00055)0.931:0.00376)0.620:0.00193)0.752:0.00565,(ABRU010000:0.00118,(HM172498-1:0.01258,AB008392-1:0.01374)0.871:0.00411)0.879:0.00660)0.583:0.00899)0.970:0.01585)0.997:0.02445)0.975:0.01207,(((((JQ659558-1:0.01433,(HQ025927-1:0.00573,X67221-1-1:0.00682)0.985:0.01456)0.926:0.01044,(((JN592453-1:0.01797,(AB175630-1:0.00051,(HM355658-1:0.00055,AB175632-1:0.00055)1.000:0.00064)0.934:0.00901)0.944:0.00908,(AJUA010000:0.01390,(AB252199-1:0.00554,CP000943-2:0.00531)0.958:0.01077)0.128:0.00473)0.963:0.01192,(((AB119197-1:0.01781,AJ491847-1:0.01051)0.982:0.01192,(AEVM020000:0.00099,AJ431384-1:0.00440)0.983:0.01084)0.231:0.00187,(AB648997-1:0.00378,(AKZI010001:0.01593,(((AF239255-1:0.00110,(D84604-1-1:0.00519,((((HM053959-1:0.00110,EU531568-1:0.00313)0.965:0.00523,(((AGWY010000:0.0,AFOF010000:0.0):0.00303,JGCL010000:0.00055)0.379:0.00209,(AY568506-1:0.00741,(AB099659-1:0.00055,(ADVZ010000:0.00055,AF288310-1:0.00055)0.973:0.00413)0.939:0.00324)0.883:0.00191)0.999:0.00055)0.000:0.00055,(AHLW010000:0.0,AHMB010000:0.0):0.00107)0.793:0.00111,(HM371092-1:0.02167,AM286396-1:0.00115)0.779:0.00208)0.796:0.00101)0.784:0.00109)0.946:0.00312,D78366-1-1:0.00054)0.000:0.00055,(LFGY010000:0.02571,CP000494-1:0.00053)0.874:0.00202)1.000:0.02236)0.987:0.01325)0.365:0.00391)0.779:0.00825)0.944:0.00972)0.909:0.00985,(AB250621-1:0.03018,(CP006912-6:0.01176,(AJ854111-1:0.00403,FN667863-1:0.01545)1.000:0.04200)0.983:0.02308)0.895:0.00772)0.808:0.00274,((CP000390-2:0.00728,((BBWO010000:0.02315,U53824-1-1:0.01024)0.982:0.01095,((KC618482-1:0.00875,((EU440986-1:0.01647,JF957616-1:0.00995)0.983:0.01139,(HG932494-1:0.00054,(KM192336-1:0.00055,EF535812-1:0.00055)0.948:0.00312)0.809:0.00188)0.797:0.00170)0.863:0.00225,(KT337528-1:0.00857,EU709017-1:0.02319)0.179:0.00270)0.904:0.00365)0.000:0.00054)0.879:0.00211,(CP010522-3:0.02492,((((AIMB010000:0.00592,((DQ538394-1:0.00110,(LN624000-1:0.00110,EU571939-1:0.00055)0.934:0.00318)0.799:0.00110,(((HG969192-1:0.00055,Z31349-1-1:0.00055)0.000:0.00054,(((M11927-1-1:0.00415,FJ719017-1:0.00336)0.799:0.00110,(HG965802-1:0.00055,((AIMA010000:0.00297,AJ278187-1:0.00053)0.976:0.00522,M65249-1-1:0.00611)0.766:0.00120)0.818:0.00109)0.777:0.00109,(CALY020000:0.00213,AJ002139-1:0.00208)0.759:0.00110)0.803:0.00109)0.795:0.00106,(Z31350-1-1:0.00055,(AF204274-1:0.00055,(Z31351-1-1:0.00054,Z31352-1-1:0.00086)0.905:0.00357)0.982:0.00055)0.748:0.00055)0.803:0.00109)0.957:0.00474)0.495:0.00207,KC854977-1:0.01484)0.401:0.00236,AB246801-1:0.00333)0.927:0.00424,(((ATTL010000:0.00095,AL591688-2:0.00055)0.895:0.00211,(AJQO010002:0.00118,((((AECL010000:0.0,AE007869-2:0.0):0.00054,AF364838-1:0.00417)0.948:0.00427,(AFSD010000:0.00319,(FW575611-1:0.00055,CP002248-5:0.00055)0.800:0.00103)0.426:0.00105)0.914:0.00587,(AHZC010001:0.00267,GU224288-1:0.01981)0.872:0.00439)0.955:0.00616)0.782:0.00110)0.799:0.00124,((JN703473-1:0.00152,((JUHU010000:0.0,JUHQ010000:0.0,HQ670653-1:0.0):0.00318,EU488751-1:0.00104)0.860:0.00388)0.830:0.00543,(FO082820-3:0.01520,(HM030758-1:0.00246,((JENZ010000:0.00055,KJ575023-1:0.00211)0.867:0.00077,(EU053207-1:0.00312,(ACEH010000:0.00108,((LIUD010000:0.0,AM040264-1:0.0,CP000708-1:0.0,CP000872-1:0.0,CP013964-1:0.0):0.00055,(AM158981-1:0.00055,AM392287-1:0.00055)0.923:0.00055)0.000:0.00055)0.724:0.00054)0.613:0.00145)0.404:0.00208)0.912:0.00501)0.944:0.00687)0.691:0.00384)0.912:0.00411)0.924:0.00486)0.854:0.00249)0.783:0.00112)0.768:0.00169,((AEEB010000:0.03701,(((AEFL010001:0.00877,(D88520-1-1:0.00269,GU125655-1:0.01550)0.914:0.00459)0.689:0.00336,CXWD010000:0.00531)0.914:0.00937,(ABXL010000:0.0,CP003147-9:0.0):0.02084)0.465:0.01047)0.366:0.00683,(AF544015-1:0.05546,(((((((((ABCL010000:0.00109,AAMV010000:0.00565)0.933:0.00588,JQ045812-1:0.03547)0.843:0.00284,((LN774719-1:0.01793,(((JQ045786-1:0.02521,JQ045797-1:0.01009)0.976:0.01689,(ACOA010000:0.00999,(EU694388-1:0.00675,(ABXS010000:0.00112,(AALZ010000:0.0,AALV010000:0.0):0.00318)0.953:0.00532)0.880:0.00312)0.462:0.00490)0.678:0.00067,((((U14583-1-1:0.00111,CP003740-2:0.00055)0.978:0.00931,CP000264-4:0.01793)0.810:0.00264,((AY424896-1:0.01149,ABXE010000:0.01542)0.784:0.00514,HM997022-1:0.00939)0.881:0.00379)0.930:0.00578,((AAYB010000:0.00656,(AAXZ010000:0.01942,AATR010000:0.02968)0.863:0.01105)0.354:0.00842,AJ582226-1:0.01288)0.917:0.00799)0.879:0.00426)0.473:0.00384)0.818:0.00254,(((ABCR010000:0.00540,((ABXF010000:0.00633,DQ915607-1:0.00461)0.962:0.00553,(AJ867254-1:0.00055,(AAYC010000:0.00415,AANB010000:0.00665)0.955:0.00540)0.777:0.00183)0.944:0.00558)0.294:0.00054,(((ACNZ010000:0.00283,CP000376-5:0.00262)0.946:0.00732,(FJ937909-1:0.00316,((ACCW010000:0.00107,AEYW010000:0.00055)0.835:0.00205,HQ908678-1:0.01797)0.801:0.00133)0.923:0.00605)0.908:0.00565,ABXM010000:0.00388)0.961:0.00631)0.734:0.00403,JQ905065-1:0.01012)0.000:0.00054)0.508:0.00055)0.782:0.00146,((AJ534211-1:0.02311,(DQ915443-1:0.01167,DQ915615-1:0.01370)0.243:0.00440)0.500:0.00714,AMGO010000:0.02153)0.953:0.01045)0.448:0.00093,(AJKJ010001:0.01059,(ACNW010000:0.00755,(AATQ010000:0.0,DQ178660-1:0.0):0.00552)0.951:0.00661)0.747:0.00246)0.996:0.01525,(ACYY010000:0.00455,LLVU010000:0.01653)0.936:0.00757)0.849:0.00482,(HG917908-1:0.02871,GU201846-1:0.00421)0.962:0.01359)0.998:0.02966,((AB008849-1:0.01525,(AAMQ010000:0.00643,AJ309862-1:0.00233)1.000:0.03796)0.937:0.01008,(AJ421782-1:0.04330,AB680593-1:0.03127)0.915:0.00884)0.967:0.01586)0.657:0.00952,AY387398-1:0.03251)0.054:0.00259)0.554:0.00890)0.945:0.00919)0.758:0.00305)0.903:0.00531)0.959:0.00941,(((CP003801-1:0.08503,((CVSC010000:0.01190,CP003809-1:0.01067)0.998:0.03617,(ADAC020000:0.02048,CP002511-1:0.03873)0.961:0.01887)1.000:0.06166)0.939:0.02281,AF069496-1:0.07105)0.514:0.00920,(((M73219-1-1:0.00054,AF036649-1:0.01001)1.000:0.07020,(((ABZA010000:0.01646,(KU255225-1:0.00638,HE660029-9:0.01553)0.929:0.00517)0.666:0.00137,(CP001391-1:0.00055,((DQ412084-1:0.0,DQ412085-1:0.0):0.00055,AAQP010000:0.00180)0.868:0.00055)0.865:0.00223)0.998:0.02962,(((M73222-1-1:0.00233,(AF318021-1:0.00520,JN622141-1:0.00727)0.777:0.00080)0.240:0.00226,U15527-1-1:0.00444)0.991:0.02323,(AB196721-1:0.01173,(HM439433-1:0.00130,AF283007-1:0.00602)0.864:0.00740)0.275:0.00403)0.998:0.02721)0.830:0.01342)0.997:0.02669,(AF478127-1:0.04744,(((L36214-1-1:0.00107,((U11014-1-1:0.00186,(U12459-1-1:0.00284,(CP000053-4:0.00055,(AJ429500-1:0.02024,L36099-27-:0.00312)0.988:0.00055)0.985:0.00054)0.717:0.00207)0.897:0.00231,((U12461-1-1:0.00311,((CP001227-1:0.0,CP001612-8:0.0,CP002428-8:0.0,CP003308-9:0.0):0.00055,(AF541999-1:0.00055,(U12462-1-1:0.00055,DQ150682-1:0.00108)0.000:0.00055)0.999:0.00055)0.761:0.00055)0.874:0.00201,((AF178037-1:0.00055,AP011533-8:0.00055)0.900:0.00201,(AICO010000:0.00396,L36104-27-:0.00521)0.816:0.00055)0.374:0.00107)0.792:0.00055)0.579:0.00055)0.000:0.00055,L36216-1-1:0.00107)0.897:0.00204,L36215-1-1:0.00054)0.997:0.02592)0.997:0.03172)0.931:0.01023)0.906:0.00819)0.891:0.00527,(((FR733695-1:0.00815,(CU459003-4:0.01750,(M58171-1-1:0.00200,D17514-1-1:0.00054)0.967:0.00800)0.864:0.00373)0.993:0.02051,((CP000613-2:0.02933,(AB049111-1:0.00654,DQ104848-1:0.01893)0.964:0.00972)0.619:0.00834,(AJ222662-1:0.04365,EU440789-1:0.04399)0.817:0.01122)0.942:0.01439)0.911:0.00868,(((AGEZ010000:0.00583,EU742165-1:0.01840)1.000:0.03082,((AMPS010002:0.01458,(AB006711-1:0.00109,Y18445-1-1:0.00451)0.999:0.02027)0.951:0.00885,(((AGFR010000:0.01540,(((LC108745-1:0.00211,EU096234-1:0.01149)0.950:0.00415,JOKL010000:0.00108)0.761:0.00055,BBMU010006:0.00501)0.981:0.01081)0.966:0.00863,((AB166735-1:0.00125,(HM100242-1:0.00549,AJ001631-1:0.00346)0.956:0.00577)0.925:0.00325,(LN623610-1:0.20928,JQ280391-1:0.00812)0.900:0.00578)0.566:0.00055)0.927:0.00519,EF408914-1:0.01310)0.950:0.00798)0.890:0.00651)1.000:0.03302,((AFXB010000:0.01645,CP001751-2:0.01163)0.996:0.02137,(ABHC010000:0.01302,CP003539-1:0.03386)0.981:0.01658)0.970:0.01469)0.915:0.00718)0.931:0.00754)0.090:0.00054)0.997:0.02611)0.709:0.00839,((((KC921178-1:0.06445,((AJ233936-1:0.00413,((AJ233922-1:0.00210,AB218215-1:0.00055)0.756:0.00158,(KC169882-1:0.00322,KJ018123-1:0.01423)0.956:0.00055)0.990:0.01817)1.000:0.03565,(CP000769-2:0.00914,CP001131-1:0.00790)0.779:0.00934)0.990:0.02351)0.838:0.01418,(AJ233938-1:0.03818,(AB016470-1:0.04215,AB083432-1:0.05730)0.990:0.02923)0.347:0.00959)0.981:0.02113,(((((JN982207-1:0.00443,((CP000698-1:0.00268,(EU660516-1:0.00055,CP001390-2:0.00055)0.941:0.00558)0.782:0.00429,((HZ485683-8:0.0,CP001661-1:0.0):0.00095,CP002479-8:0.00637)0.930:0.00459)0.948:0.00642)0.427:0.00110,X70954-1-1:0.00674)0.894:0.00535,(L07834-1-1:0.01217,CP002031-1:0.00812)0.785:0.00401)0.991:0.01428,(U23141-1-1:0.00774,AY187305-1:0.01834)0.891:0.00547)0.959:0.01302,((LUKD010000:0.02081,CP003537-7:0.02898)1.000:0.07074,((((AY493562-1:0.02985,((AF418177-1:0.03815,(AJ441316-1:0.01877,M26633-1-1:0.03003)0.995:0.02200)0.986:0.02618,CP000859-6:0.02484)0.267:0.00438)0.950:0.01083,AF084854-1:0.08039)0.941:0.01099,(GU993263-1:0.03856,(AF002671-1:0.05032,AF418174-1:0.04371)0.971:0.01856)0.434:0.00233)0.728:0.00225,(AM086646-1:0.04293,(X82874-1-1:0.06053,((AY459365-1:0.01505,CP001940-1:0.00857)0.999:0.02840,((Y13672-1-1:0.02403,AF099062-1:0.01271)0.994:0.02297,AY548789-1:0.02929)0.197:0.00634)0.962:0.01581)0.970:0.01524)0.846:0.00641)0.709:0.00562)0.920:0.01052)0.843:0.01226)0.989:0.01443,((((((D43944-1-1:0.00776,(AECZ010000:0.00602,AHMC010000:0.00228)0.348:0.00502)1.000:0.04603,(AY726757-1:0.04528,((AB294142-1:0.02120,(KJ459860-1:0.01113,AF192152-1:0.01187)0.997:0.02479)0.962:0.01877,(((KP682308-1:0.02926,AF458778-1:0.01074)0.990:0.02270,(HM852532-1:0.01601,X95230-1-1:0.01399)0.978:0.02151)0.071:0.00690,DQ365926-1:0.04376)0.638:0.00531)0.579:0.01399)0.227:0.00809)0.337:0.01077,CP003221-1:0.03893)0.716:0.00965,AJ277894-1:0.02318)0.751:0.00813,(U48244-1-1:0.06076,EU296537-1:0.03219)0.745:0.01181)0.996:0.02726,((JQ346734-1:0.16736,Y18292-1-1:0.10483)0.258:0.01292,((AY691430-1:0.01452,AF357197-1:0.01870)0.993:0.02818,(AP009178-3:0.01104,((((AP012048-1:0.00328,(KJ364501-1:0.01744,EU106661-1:0.01426)0.950:0.01293)1.000:0.04170,((AB368775-1:0.00347,U41564-1-1:0.01980)0.990:0.02469,((HM536952-1:0.00461,((AF550655-1:0.00532,AF550659-1:0.00293)0.982:0.00737,AF550650-1:0.00109)0.929:0.00535)0.858:0.00437,((((AF550640-1:0.02463,(HM007568-1:0.00125,(FBKY010000:0.00055,CP007776-1:0.00303)0.855:0.00197)0.807:0.00335)0.999:0.01671,(AY621110-1:0.00818,AY621303-1:0.00116)0.977:0.00690)0.197:0.00053,JX232347-1:0.01329)0.992:0.01566,(AF550656-1:0.00935,AJ251584-1:0.03147)0.971:0.01422)0.428:0.00293)1.000:0.03981)0.840:0.01282)0.943:0.01574,(AB175500-1:0.04279,AP009179-3:0.02769)0.978:0.01860)0.226:0.00712,(((AB053951-1:0.00409,CP003920-6:0.00447)0.999:0.02719,((ABXD010000:0.0,AFRZ010000:0.0):0.00607,(AB088431-1:0.01638,L40808-1-1:0.02325)0.786:0.01107)1.000:0.03812)0.926:0.01465,(M88159-1-1:0.01524,((AF246984-1:0.00441,(JNOA010000:0.00205,((JRPI010000:0.00239,(AB275317-1:0.00668,AY631952-1:0.00596)0.993:0.01145)0.925:0.00913,KJ534295-1:0.00054)0.957:0.00710)0.927:0.00636)0.895:0.00587,(M35048-1-1:0.01248,((AY366425-1:0.00463,(CDMM010000:0.00055,Y09404-1-1:0.00107)0.771:0.00096)0.993:0.01503,(M88148-1-1:0.00700,(LLVX010000:0.01514,FN565164-1:0.00421)0.821:0.00227)0.869:0.00767)0.991:0.01520)0.596:0.00478)0.831:0.00989)1.000:0.04060)0.836:0.00794)1.000:0.05737)0.976:0.02965)0.998:0.04332)0.987:0.02677)0.556:0.00710)0.933:0.01162)0.925:0.00982)0.664:0.00620)0.947:0.01865)0.927:0.01318,(AJ298748-1:0.00622,(AJ298726-1:0.00685,CP002086-1:0.00389)0.046:0.00232)0.996:0.02369)0.876:0.00973,(((LN614387-1:0.02677,(EU697015-1:0.02310,(((FJ654662-1:0.00526,(HM205110-1:0.00212,((((M22516-1-1:0.00590,(AF328145-1:0.01374,LXSI010000:0.00757)0.528:0.00218)0.930:0.00460,(AF395911-1:0.00054,(AJ239291-1:0.00055,FJ823154-1:0.00388)0.999:0.00054)0.000:0.00053)0.803:0.00108,CCJT010000:0.00735)0.824:0.00054,((JREU010000:0.00055,((((HZ486040-1:0.00365,(DQ117530-1:0.00960,HZ486039-1:0.00217)0.788:0.00159)0.875:0.00413,(HZ486035-9:0.00055,HF558383-1:0.00055)0.856:0.00310)0.757:0.00197,AJ239284-1:0.00337)0.703:0.00246,CQLT010000:0.00619)0.000:0.00053)0.884:0.00228,KJ585681-1:0.00199)0.797:0.00303)0.900:0.00391)0.397:0.00114)0.778:0.00081,FJ823141-1:0.01115)1.000:0.02333,(LKIW010000:0.01306,(AY609199-1:0.00301,AP012224-4:0.00123)0.986:0.01040)0.807:0.00304)0.922:0.00924)0.866:0.01331)0.576:0.00493,(((AB070984-1:0.00590,((JZQZ010001:0.00642,HM446363-1:0.02550)0.959:0.01100,(AJ621026-1:0.00292,CP002552-6:0.00971)0.988:0.00931)0.925:0.00565)0.824:0.00276,((AB506456-1:0.01420,(DQ386859-1:0.01874,(AY277622-1:0.00607,(CP000089-1:0.02116,CP001715-2:0.01378)0.746:0.00445)0.954:0.01089)0.976:0.01273)0.227:0.00423,(CP002159-1:0.01771,((AAUX010000:0.02622,(DQ287786-1:0.00145,CP002056-1:0.00840)0.898:0.00418)0.945:0.00602,(DM169692-4:0.00955,(AY486133-1:0.00954,CP002252-7:0.00055)0.963:0.00649)0.938:0.00580)0.981:0.01009)0.917:0.00659)0.935:0.00691)0.997:0.01744,((((ABCT010000:0.00896,HZ485887-1:0.01527)0.668:0.00421,((L29303-1-1:0.01510,((((LN870300-1:0.00055,((HM042692-1:0.00520,AB066372-1:0.00121)1.000:0.01566,CP002663-6:0.00762)0.915:0.00591)0.609:0.00414,(HM560954-1:0.00055,(LNOL010000:0.00055,DQ001159-1:0.00427)0.000:0.00055)0.999:0.02097)0.877:0.00300,(((CVJA010000:0.00055,JQ231232-1:0.00123)0.808:0.00109,(AJ278452-1:0.00055,LRII010000:0.00055)0.000:0.00055)0.890:0.00214,(KU129011-1:0.00332,(CP002287-2:0.00109,(LGYD010000:0.00109,JWMK010000:0.00055)0.000:0.00055)0.821:0.00106)0.938:0.00316)0.794:0.00110)0.284:0.00055,EU603444-1:0.00290)0.299:0.00563)0.997:0.01650,(((AY455809-1:0.00054,AM492684-1:0.00315)0.999:0.01492,(((AHLZ010000:0.00436,(AB016167-1:0.00485,AF176594-1:0.00736)0.714:0.00262)0.684:0.00123,(FW561815-2:0.00664,AF244133-1:0.00109)0.857:0.00234)0.968:0.00802,(((((AGTS010000:0.00055,HM027578-1:0.00318)0.883:0.00337,((((AJ418042-1:0.00544,(CP000539-1:0.0,CP001392-1:0.0):0.00094)0.217:0.00206,LN558651-1:0.07568)0.803:0.00246,((JXDJ010000:0.00110,AB021421-1:0.00055)0.785:0.00092,(JN627864-1:0.00623,KT345639-1:0.00275)0.954:0.00518)0.942:0.00447)0.865:0.00286,(JOUB010000:0.00109,CP002735-6:0.00055)0.971:0.00674)0.537:0.00222)0.829:0.00191,CP003872-1:0.00114)0.678:0.00054,DQ327668-1:0.01504)0.873:0.00291,((CP000316-4:0.00166,AY166684-1:0.00267)0.944:0.01069,(KF528736-1:0.01194,CP004885-2:0.02069)0.913:0.00668)0.721:0.00387)0.977:0.01121)0.994:0.01395)0.945:0.00834,(HM037997-1:0.02193,AB370250-1:0.03687)0.929:0.01006)0.722:0.00442)0.746:0.00453)0.733:0.00178,(((CDLW010000:0.00055,(AKCV010000:0.00955,(ACTT020000:0.00109,JFZH010000:0.00055)0.865:0.00210)0.495:0.00432)0.960:0.00664,(AB055427-1:0.00318,((JN688161-1:0.01237,AB007995-1:0.00217)0.485:0.00371,(JFZD010000:0.00054,(AM397067-1:0.00511,CP004348-3:0.00125)1.000:0.02652)0.893:0.00261)0.837:0.00055)0.880:0.00288)0.959:0.00867,((AY268170-1:0.00055,AF139174-1:0.00055)0.995:0.01286,((AJHK020000:0.0,CP003087-1:0.0):0.00143,(AP013058-1:0.00123,(((CHKS010000:0.00055,((LOYX010000:0.00214,JX986970-1:0.00055)0.801:0.00109,((KF995705-1:0.00055,((LEKY010000:0.00111,LPDN010000:0.00110)0.822:0.00110,AM905038-1:0.00214)0.000:0.00055)0.000:0.00055,(JN695897-1:0.03016,(LAUA010000:0.00054,LOXD010000:0.00054)1.000:0.00051)0.791:0.00123)0.790:0.00112)0.812:0.00110)0.916:0.00080,(DQ108388-1:0.00110,(LOXG010001:0.00110,JNOV010000:0.00055)0.000:0.00055)0.000:0.00053)0.991:0.00837,((HM019519-1:0.00111,((AY435213-1:0.00055,(CP002217-2:0.0,CP002519-1:0.0):0.00055)0.000:0.00054,(((FM209483-1:0.00054,LC104297-1:0.00750)0.903:0.00206,(ABYL010003:0.00055,CP002013-1:0.00309)0.984:0.00866)0.921:0.00055,(ADNR020000:0.00055,(EF139187-1:0.00164,LC104283-1:0.05555)0.801:0.00159)0.000:0.00055)0.805:0.00108)0.980:0.00535)0.879:0.00232,HQ005405-1:0.00407)0.268:0.00143)0.886:0.00293)0.774:0.00407)0.971:0.00877)0.929:0.00674)0.951:0.00763)0.854:0.00426,((HG917902-1:0.00877,(EU549853-1:0.00511,((AKJW010001:0.00879,(((JF970593-1:0.00405,(AMWD010000:0.00055,LK391531-1:0.01209)0.270:0.00313)0.990:0.00872,CP000269-2:0.00055)0.155:0.00139,AY728038-1:0.00086)0.913:0.00531)0.432:0.00479,AY281135-1:0.00563)0.797:0.00426)0.243:0.00506)0.999:0.01920,(KJ147082-1:0.01440,(AB024934-1:0.00983,(CR555306-1:0.00500,(AP012304-7:0.00527,(AM406670-2:0.00420,CP001281-4:0.01197)0.940:0.00756)0.316:0.00221)0.967:0.00890)0.944:0.00648)0.941:0.00742)0.697:0.00392)0.696:0.00473)0.278:0.00206)1.000:0.05027,AJ421425-9:0.05373)0.859:0.00616)0.640:0.00387)0.919:0.00652)0.768:0.00465,(((KM192265-1:0.00806,CP003380-1:0.00155)0.678:0.00226,(ABXT010000:0.00151,AFIG010000:0.00944)0.709:0.00442)0.998:0.02116,L40994-1-1:0.03914)0.942:0.00847)0.961:0.00697)0.187:0.00262)0.843:0.00421,(FP929140-1:0.05496,(AJ563935-1:0.00953,((AFWS020000:0.00951,(((AJ224438-1:0.02873,(DQ062160-1:0.01778,FM178270-1:0.01335)0.950:0.01007)0.849:0.00555,FM178273-1:0.00054)0.738:0.00464,AJ224439-1:0.01341)0.914:0.00653)0.863:0.00626,AJ010125-1:0.01001)0.994:0.01774)0.480:0.00251)0.341:0.00545)0.928:0.00710)0.846:0.00738)0.935:0.00933,((AJ431699-1:0.01722,(AAOE010000:0.02641,AY136131-1:0.02624)0.495:0.01089)0.894:0.00862,((AANE010000:0.00643,(EU188440-1:0.00811,(EF094505-1:0.01803,CP002771-1:0.00349)0.878:0.00591)0.939:0.00834)0.977:0.01600,(AB021367-1:0.02217,GQ245895-1:0.02914)0.914:0.01091)0.407:0.00456)0.986:0.01482)0.728:0.00843,((AGIG010000:0.03029,(CP000488-1:0.04118,(AF268219-1:0.00323,(AHBH010000:0.00792,AHBG010000:0.00498)0.813:0.00482)1.000:0.05190)0.770:0.01370)0.790:0.00340,((AAVT010000:0.01544,(ABXQ010000:0.00778,((ACCY010000:0.00373,AAVV010000:0.01128)0.937:0.01002,(ACCX010000:0.00055,AAOA020000:0.00218)0.943:0.00657)0.879:0.01030)0.963:0.01565)0.959:0.01303,JQ661003-1:0.05210)0.907:0.00942)0.874:0.00526)0.287:0.00566,(((HQ189532-1:0.00325,(JXQW010000:0.00110,(((((AY907566-1:0.00109,((JFBC010011:0.0,CP003961-1:0.0):0.00055,((JXOG010000:0.00109,AJJP010002:0.00055)0.921:0.00209,JTBY010000:0.00055)0.000:0.00055)0.903:0.00055)0.000:0.00055,((((AYJR010000:0.00055,JN637321-1:0.00428)0.922:0.00098,HG796168-1:0.00061)0.917:0.00053,((CP006852-1:0.00103,((AJ889838-1:0.00110,(JSED010011:0.00055,(JN627143-1:0.00055,(AB680056-1:0.00055,(AB021402-1:0.00055,(AJ278812-1:0.00148,D84007-1-1:0.00318)0.475:0.00055)0.000:0.00055)0.000:0.00055)0.927:0.00055)0.730:0.00055)0.849:0.00109,((D84025-1-1:0.00055,JQ045802-1:0.01581)0.487:0.00055,AJ583501-1:0.00055)0.258:0.00054)1.000:0.00054)0.919:0.00079,AHHC010000:0.00055)0.922:0.00054)0.878:0.00210,(CP003880-1:0.00210,AKJO010000:0.00055)1.000:0.00054)0.922:0.00090)0.869:0.00212,LVEJ010000:0.00110)0.760:0.00104,(AJWX010000:0.00414,AB021413-1:0.00319)0.913:0.00318)0.784:0.00111,((JTFL010001:0.00208,((JXJL010000:0.00053,JVYC010001:0.00199)0.897:0.00294,(ANIR020000:0.00535,(CVWN010001:0.00527,EU497964-1:0.00054)0.967:0.00512)0.925:0.00319)0.867:0.00210)0.000:0.00055,LDSY010000:0.01497)0.893:0.00209)0.777:0.00110)0.929:0.00409)0.866:0.00366,(GQ273962-1:0.01251,(LK391969-2:0.00156,AB021419-1:0.00576)0.964:0.01459)0.949:0.00865)0.994:0.01294,(AFPJ010000:0.02222,((EU604077-1:0.01614,CP000282-1:0.01261)0.916:0.00545,(EF617350-1:0.01810,AF452103-1:0.01950)0.894:0.00556)0.910:0.01049)0.952:0.00962)0.360:0.00552)0.835:0.00339)0.840:0.00603,(HQ908701-1:0.03937,(HQ641752-1:0.00965,(LN651140-1:0.00892,(AHBC010000:0.00111,(JF340230-1:0.00096,(LK391683-1:0.00542,EU651835-1:0.00252)0.768:0.00143)0.857:0.00412)0.968:0.00957)0.960:0.01155)0.985:0.01964)0.944:0.01009)0.996:0.01759)0.524:0.00528)0.972:0.01104,((((ABCQ010000:0.02566,AB013839-1:0.00619)0.998:0.01759,((AF011335-1:0.01232,(AJ551090-1:0.00282,(AB003189-1:0.00108,D21225-1-1:0.00210)0.913:0.00346)0.942:0.00540)0.891:0.00337,(DQ286387-1:0.00849,((AY579750-1:0.00694,JF412207-1:0.00054)0.997:0.01379,AF005248-1:0.02417)0.000:0.00054)0.978:0.00606)0.738:0.00145)0.708:0.00085,(GQ414577-1:0.00054,((DQ010165-1:0.00856,(AJ000214-1:0.00055,(EU543691-1:0.00209,((LRDC010000:0.00309,AJ311964-1:0.00963)0.961:0.00529,CP000503-3:0.00055)0.969:0.00055)0.832:0.00107)0.981:0.00054)0.754:0.00104,(CP000446-4:0.00054,(AF005253-1:0.00218,(KF469178-1:0.03234,AF136392-1:0.00820)0.690:0.00054)0.987:0.00054)0.000:0.00053)0.999:0.01067)0.986:0.00934)0.971:0.00890,(((JN681805-1:0.01413,(JXXX010000:0.00055,KC534219-1:0.00055)0.885:0.00244)0.963:0.00735,(LC131144-1:0.04038,((CP001796-3:0.00055,(LK391678-1:0.00534,(KF245483-1:0.01931,KP347044-1:0.01175)0.965:0.00055)0.739:0.00055)0.783:0.00095,(((FJ457127-1:0.00307,EF198383-1:0.00126)0.169:0.00309,(JJNZ010000:0.00055,DQ517869-1:0.00108)0.895:0.00191)1.000:0.00054,KC178900-1:0.01055)0.934:0.00321)0.985:0.00879)0.794:0.00184)0.192:0.00212,(JXYA010000:0.00501,JPWZ010000:0.01312)0.232:0.00205)1.000:0.02506)0.747:0.00469)0.776:0.00328)0.464:0.00430,(EU620413-1:0.03224,(JQ666155-1:0.02056,((EU817498-1:0.00055,(JX122604-1:0.00055,EU909459-1:0.00383)0.952:0.00054)0.848:0.00548,(AFHI010000:0.00466,KT446403-1:0.07321)0.955:0.00975)0.997:0.02614)0.860:0.01238)0.885:0.00614)0.923:0.00988)0.966:0.01090)0.770:0.00317)0.997:0.01468)0.000:0.00054)0.195:0.00306,(CP002038-1:0.00207,(AFWW010000:0.00629,AWXH010000:0.00628)0.891:0.00211)0.865:0.00237)0.964:0.00609,(((JXUR020002:0.00415,AY278672-1:0.00426)0.987:0.00855,(D78007-1-1:0.00283,AY286478-1:0.00151)0.718:0.00149)0.623:0.00171,((LGAY010000:0.00314,KJ127202-1:0.00532)0.944:0.00559,(HM038004-1:0.00218,(CBWE010000:0.01494,((LCVM010001:0.00311,JTAU010000:0.00414)0.801:0.00109,(JN644539-1:0.00431,KC210840-1:0.00213)0.890:0.00292)0.856:0.00054)0.388:0.00177)0.742:0.00291)0.920:0.00541)0.973:0.00672)0.917:0.00406)0.968:0.00620,AKXM010000:0.00201)0.853:0.00331,((CCES010000:0.00572,((AJ233432-1:0.00311,(JSXC010000:0.00273,(JSYH010000:0.00208,(JQHO010000:0.00308,(JMDL010000:0.0,CP003415-2:0.0):0.00055)0.774:0.00108)0.937:0.00466)0.945:0.00534)0.800:0.00135,(((ADCU020000:0.00500,(JQ014184-1:0.00343,((CAQH010000:0.00268,((CQDU010000:0.00109,CQER010000:0.00107)0.809:0.00109,(((LQBA010001:0.0,CQDI010000:0.0):0.00055,EF179121-1:0.00210)0.937:0.00311,((CQCB010000:0.0,CTIO010000:0.0):0.00055,(CQAG010000:0.00055,EF179125-1:0.00055)0.839:0.00055)0.000:0.00055)0.839:0.00109)0.316:0.00055)0.720:0.00209,(AJHJ010000:0.00116,CP002505-4:0.00127)0.802:0.00129)0.615:0.00054)0.867:0.00306)0.342:0.00055,(LHUQ010000:0.00054,(JN596115-1:0.00055,KC178580-1:0.00055)0.893:0.00204)0.391:0.00108)0.820:0.00119,(LRQU010000:0.0,CP002774-2:0.0,CP002775-2:0.0):0.00193)0.795:0.00164)0.353:0.00310)0.784:0.00153,(JUOM010000:0.00055,JUSZ010001:0.00055)0.000:0.00055)0.919:0.00301)0.000:0.00055,CP003938-4:0.00215)0.000:0.00054,JHQH010000:0.00055)0.823:0.00106,JUQI010001:0.00052)0.888:0.00190)0.688:0.00208,(JQ271806-1:0.00424,(JUPK010023:0.00055,(JUPU010003:0.0,LESR010000:0.0,AKTT010000:0.0):0.00055)0.817:0.00108)1.000:0.00055)0.919:0.00087,Y17664-1-1:0.00213)0.871:0.00209)0.770:0.00107)0.791:0.00110,(AB682284-1:0.00107,((((AP012551-9:0.00517,CP002433-2:0.00415)0.000:0.00054,(((CP002124-2:0.00090,(FJ595864-1:0.00259,EU490590-1:0.00054)0.271:0.00146)0.802:0.00112,(LHXI010000:0.00111,HM582879-1:0.01767)0.796:0.00148)0.854:0.00190,(JUQR010003:0.00055,(AF373198-1:0.00053,(CVNH010000:0.00055,(ADWZ010000:0.0,LVHW010000:0.0,AEDL010000:0.0):0.00107)0.951:0.00315)0.972:0.00414)0.870:0.00204)0.353:0.00109)0.981:0.00606,((BBVM010000:0.00253,(((JURW010006:0.0,ACAC020000:0.0,JZWN020000:0.0):0.00055,JTBI010000:0.00108)0.000:0.00055,(AEME010000:0.00208,JQ315913-1:0.00616)0.000:0.00055)0.798:0.00052)0.905:0.00291,(KP776467-1:0.06765,(JPZH010002:0.00055,((JN205049-1:0.00055,(HM069223-1:0.00055,EF059839-1:0.00055)0.921:0.00215)0.912:0.00213,HM069209-1:0.00322)0.000:0.00055)0.866:0.00132)0.783:0.00208)0.348:0.00110)0.293:0.00051,(KC178578-1:0.00312,(((JQ659688-1:0.00055,(LECA010000:0.00055,(CCUF010000:0.00055,((AB045730-1:0.00053,AB045737-1:0.00108)0.977:0.00506,AB680018-1:0.00109)0.781:0.00055)0.832:0.00108)0.914:0.00273)0.698:0.00210,(HM748091-1:0.00578,(JUXS010002:0.00110,JUOE010004:0.00052)0.895:0.00207)0.868:0.00255)0.827:0.00069,AB273738-1:0.00315)0.000:0.00052)0.699:0.00055)0.671:0.00109)0.000:0.00055);
